# Supplementary material for: In silico predictions of protein interactions between Zika virus and human host
Source: PeerJ journal article supplement (doi:10.7717/peerj.11770), 2021-08-24

# INOSITOL PHOSPHATE METABOLISM

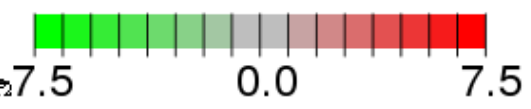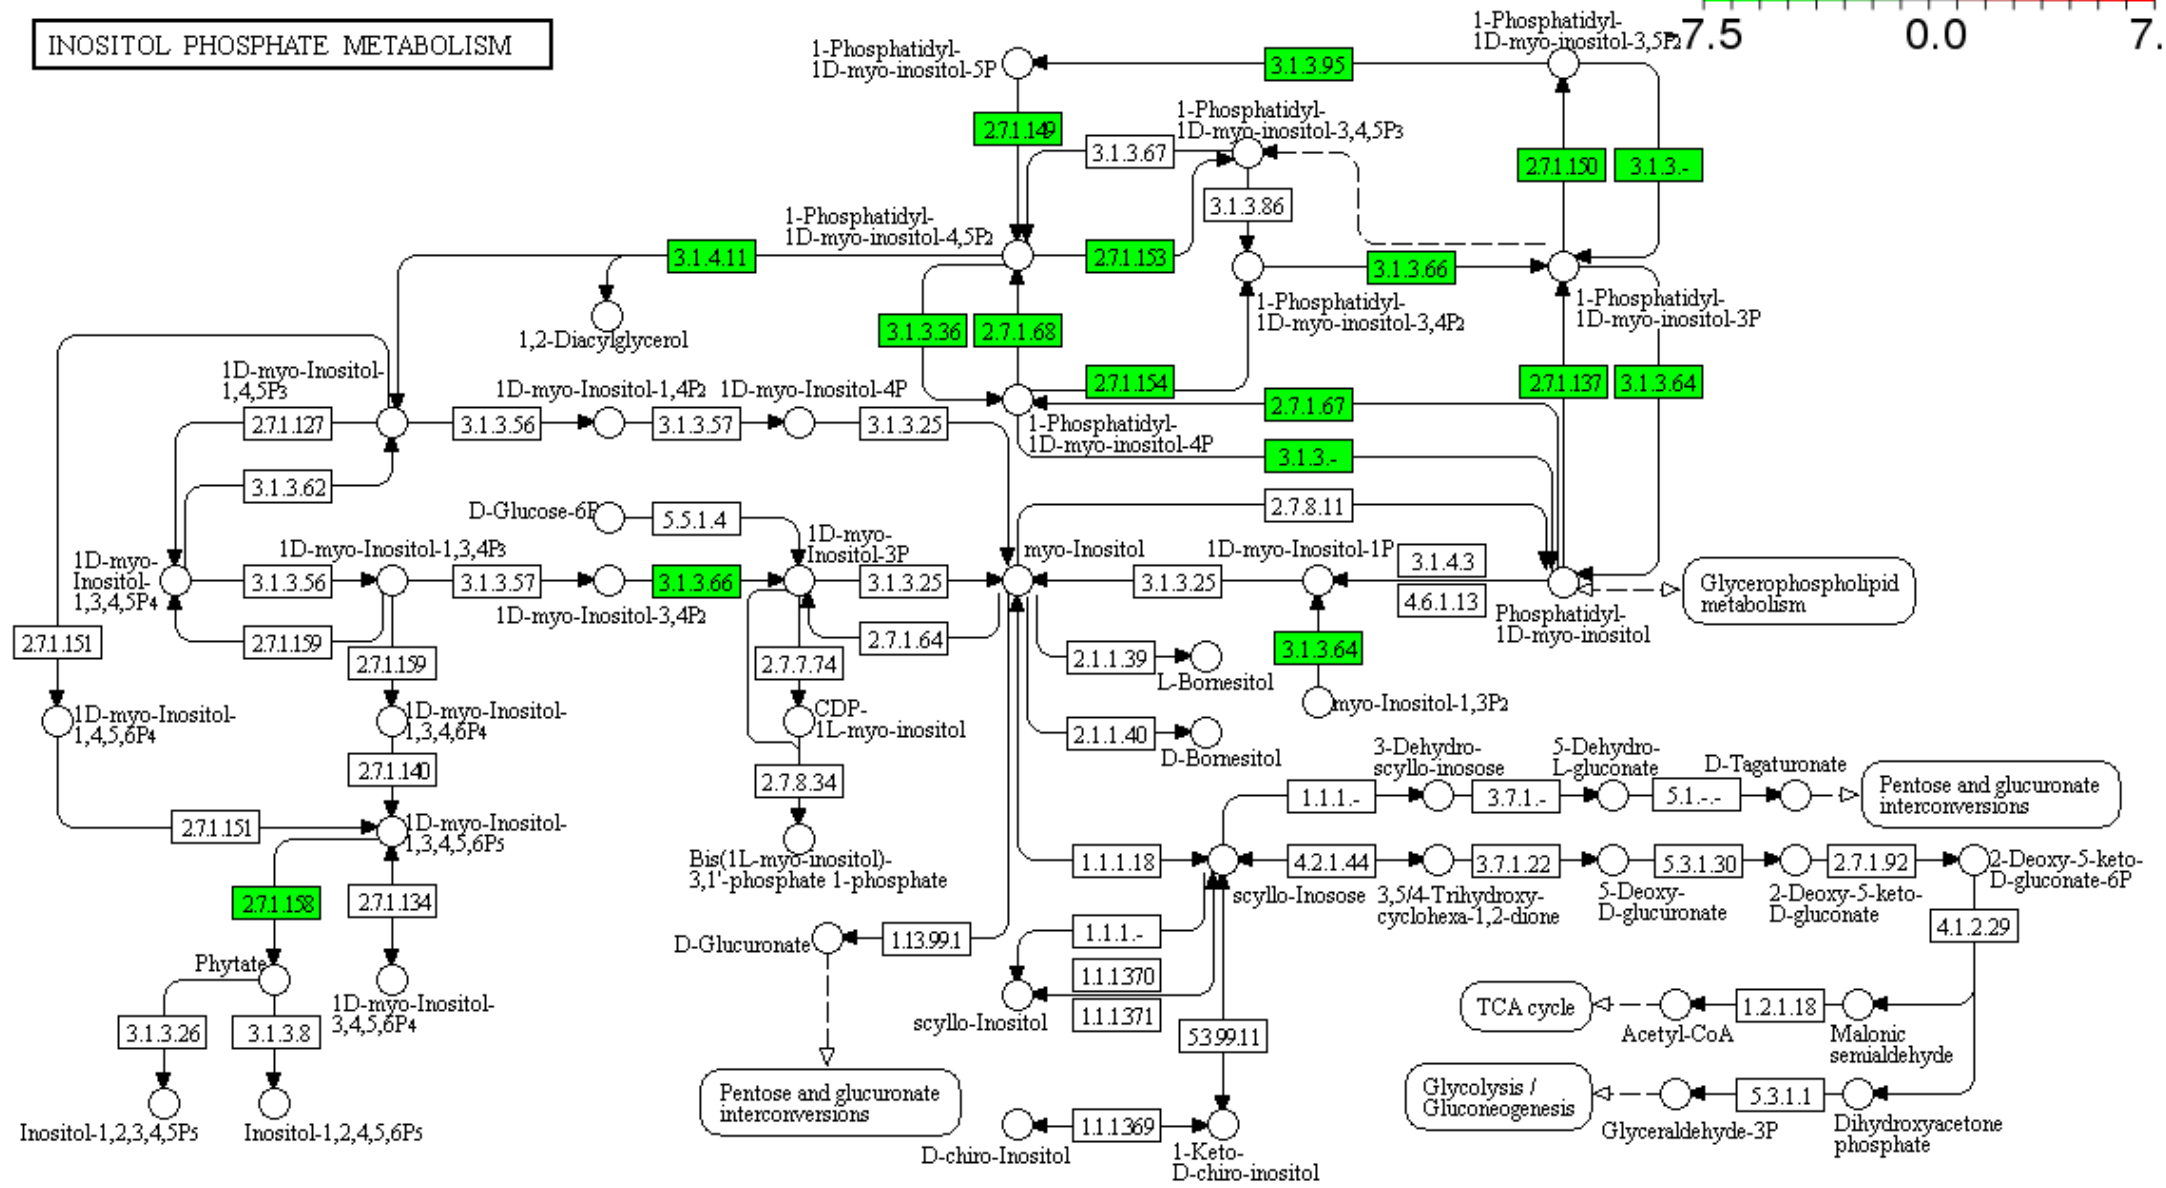

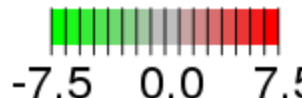

**FANCONI ANEMIA PATHWAY**

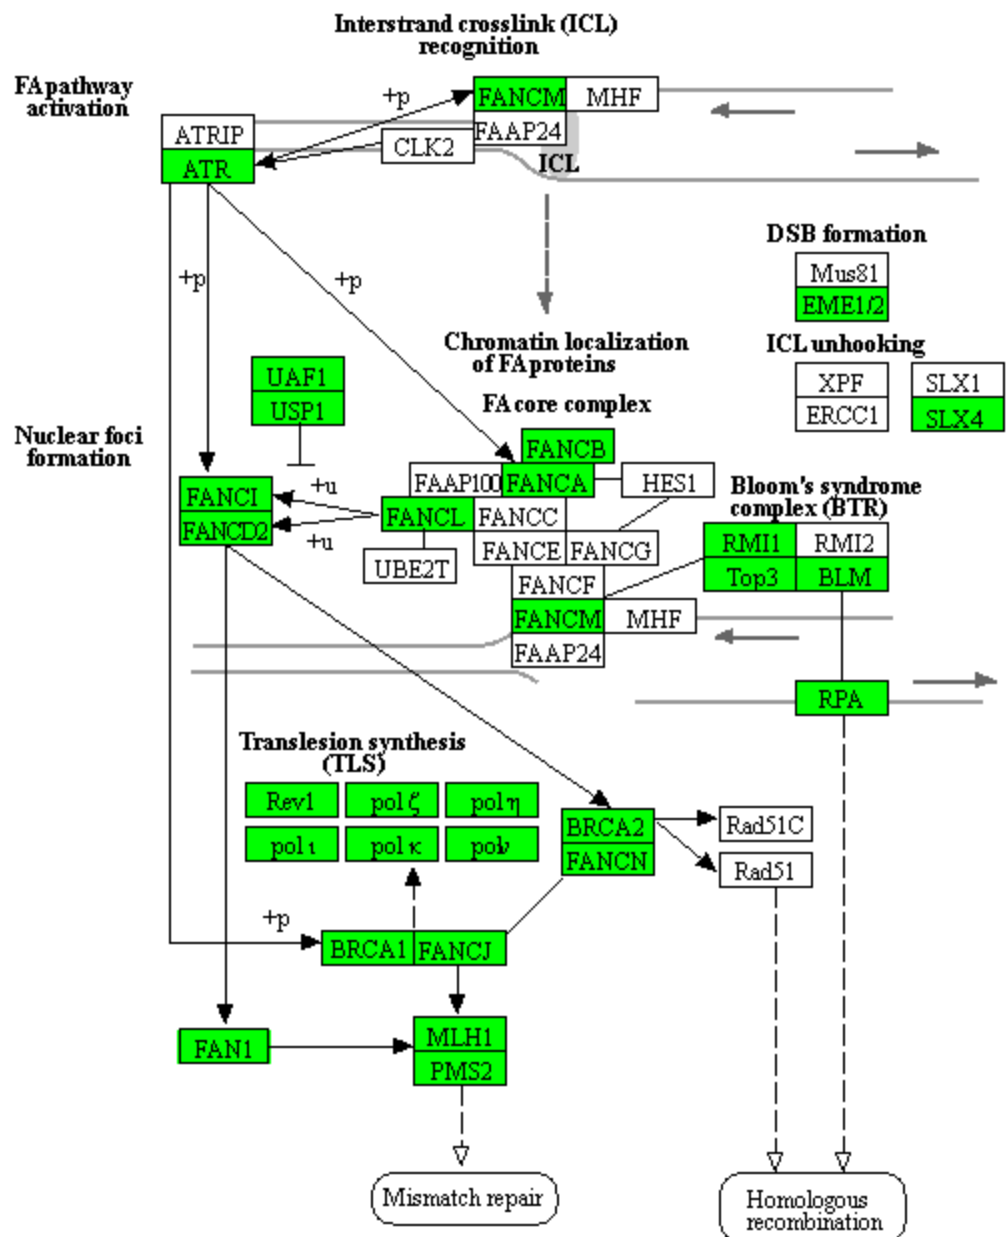

ERBB SIGNALING PATHWAY

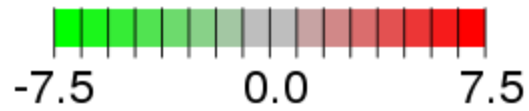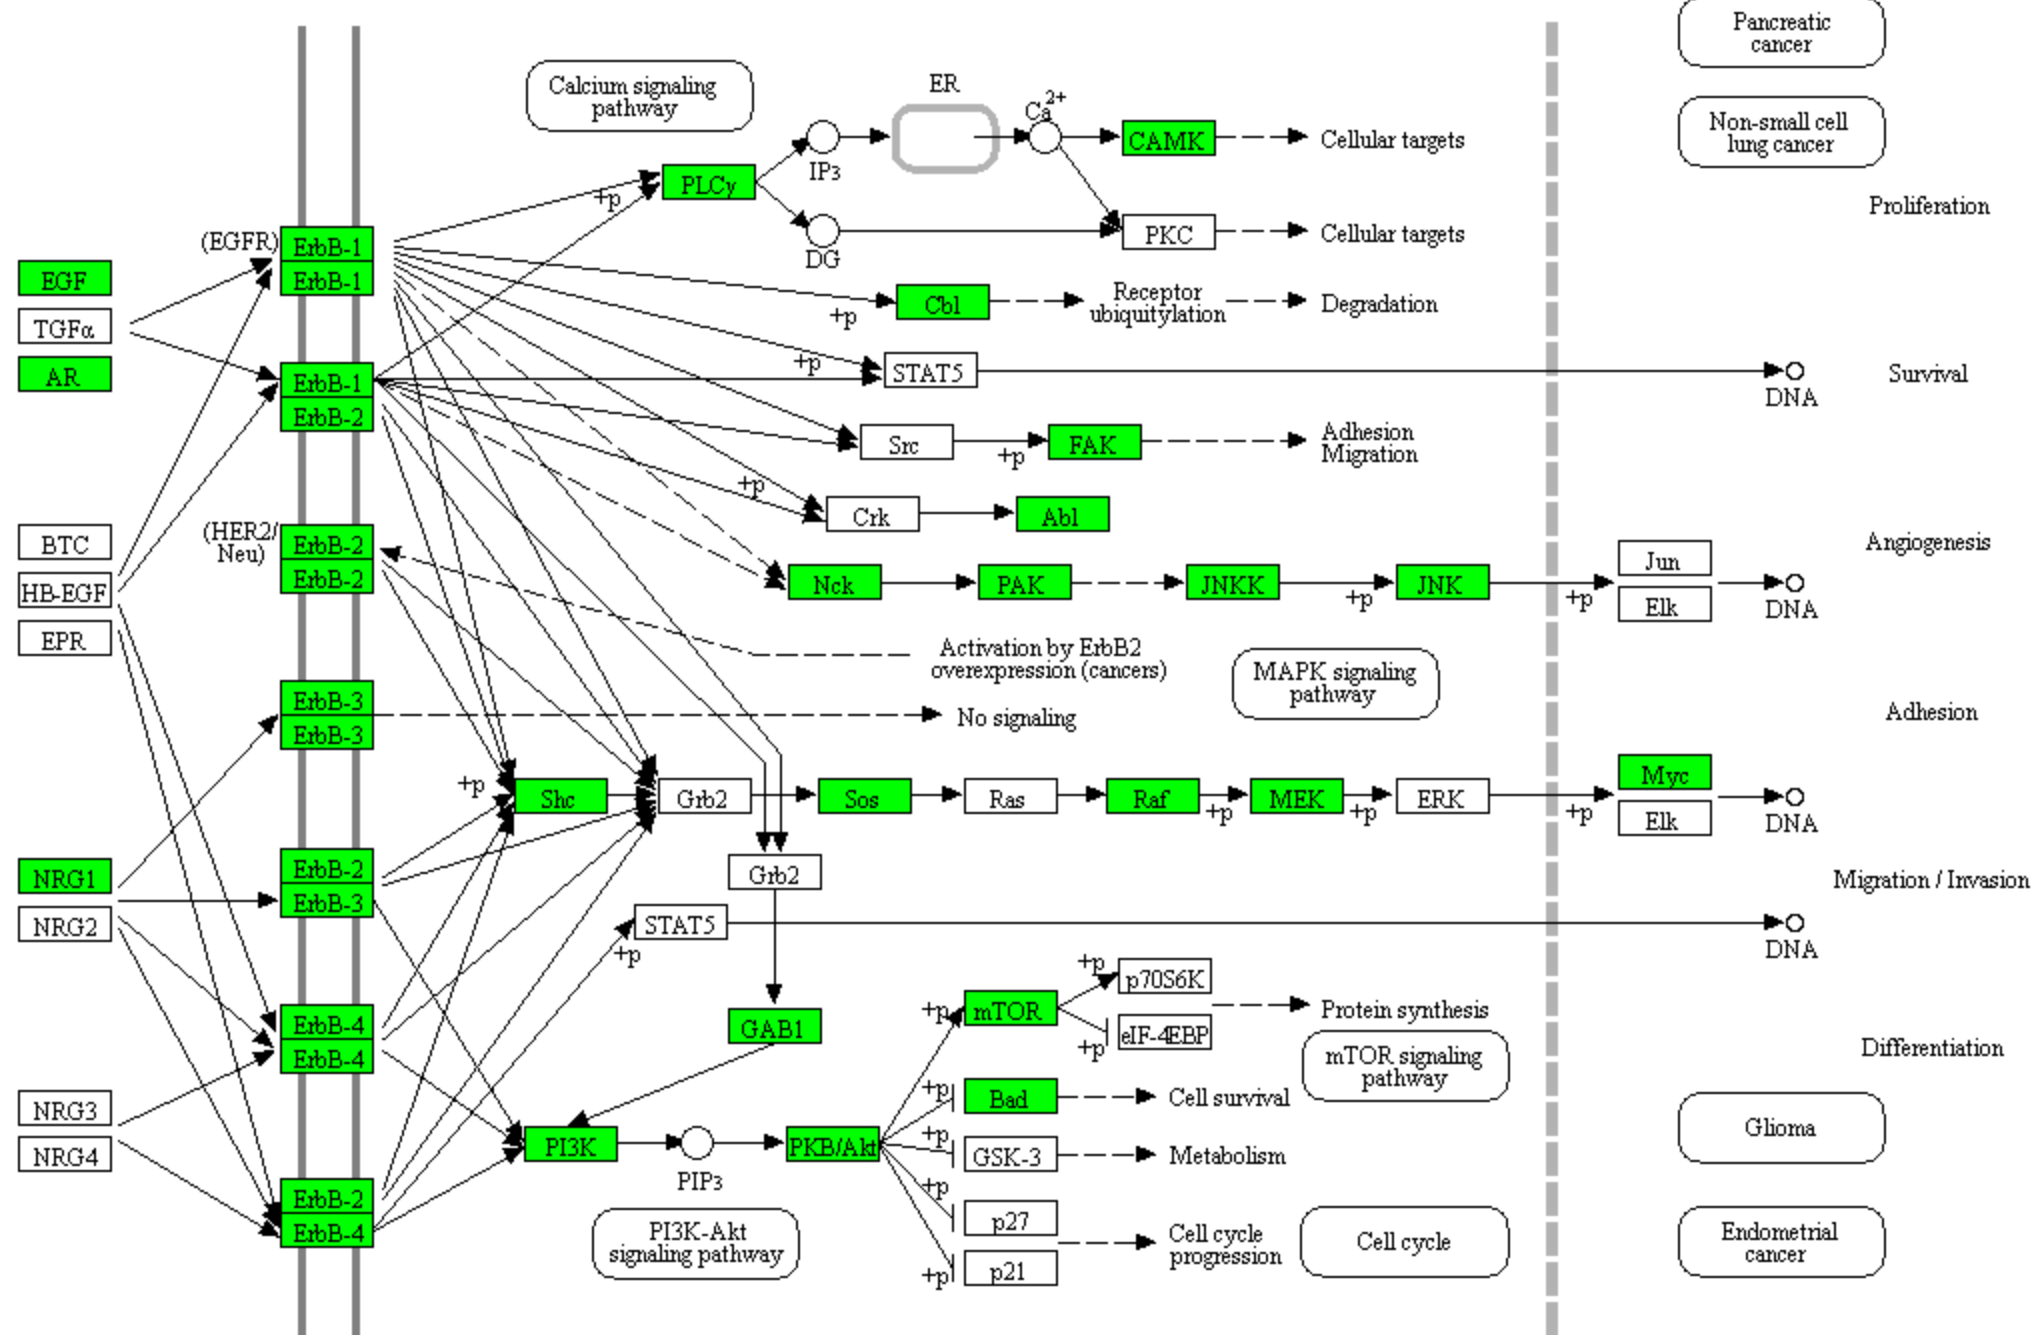

- Pancreatic cancer
- Non-small cell lung cancer

Proliferation

Survival

Angiogenesis

Adhesion

Migration / Invasion

Differentiation

- Glioma

- Endometrial cancer

RAS SIGNALING PATHWAY

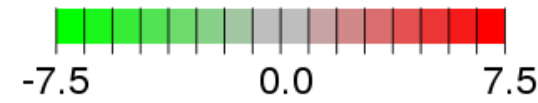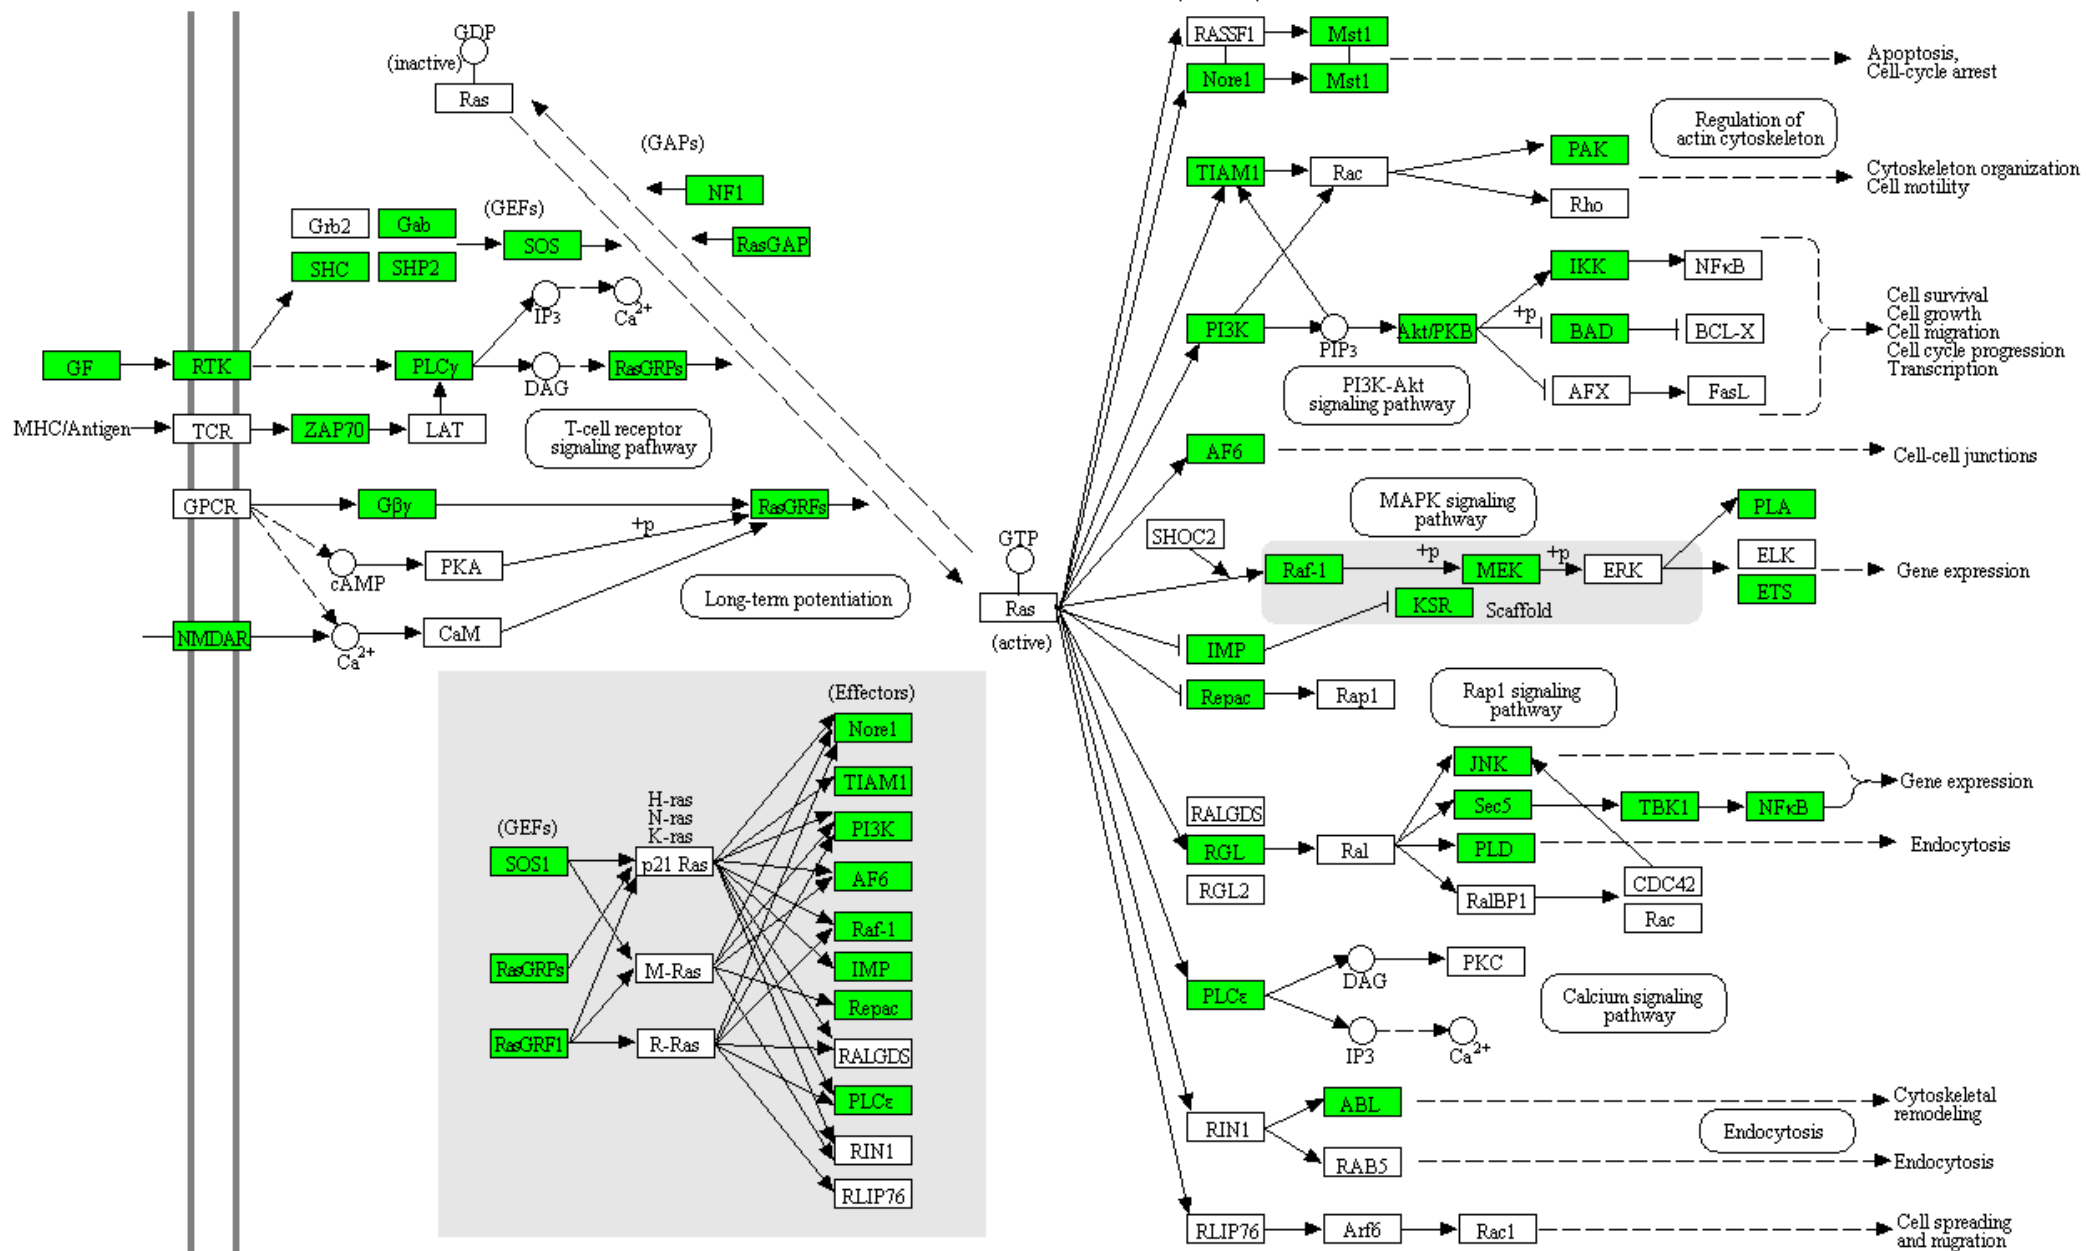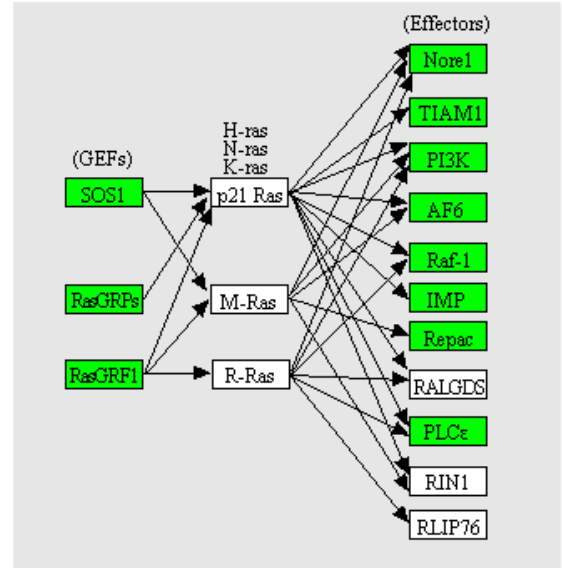

NF-KAPPA B SIGNALING PATHWAY

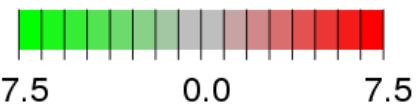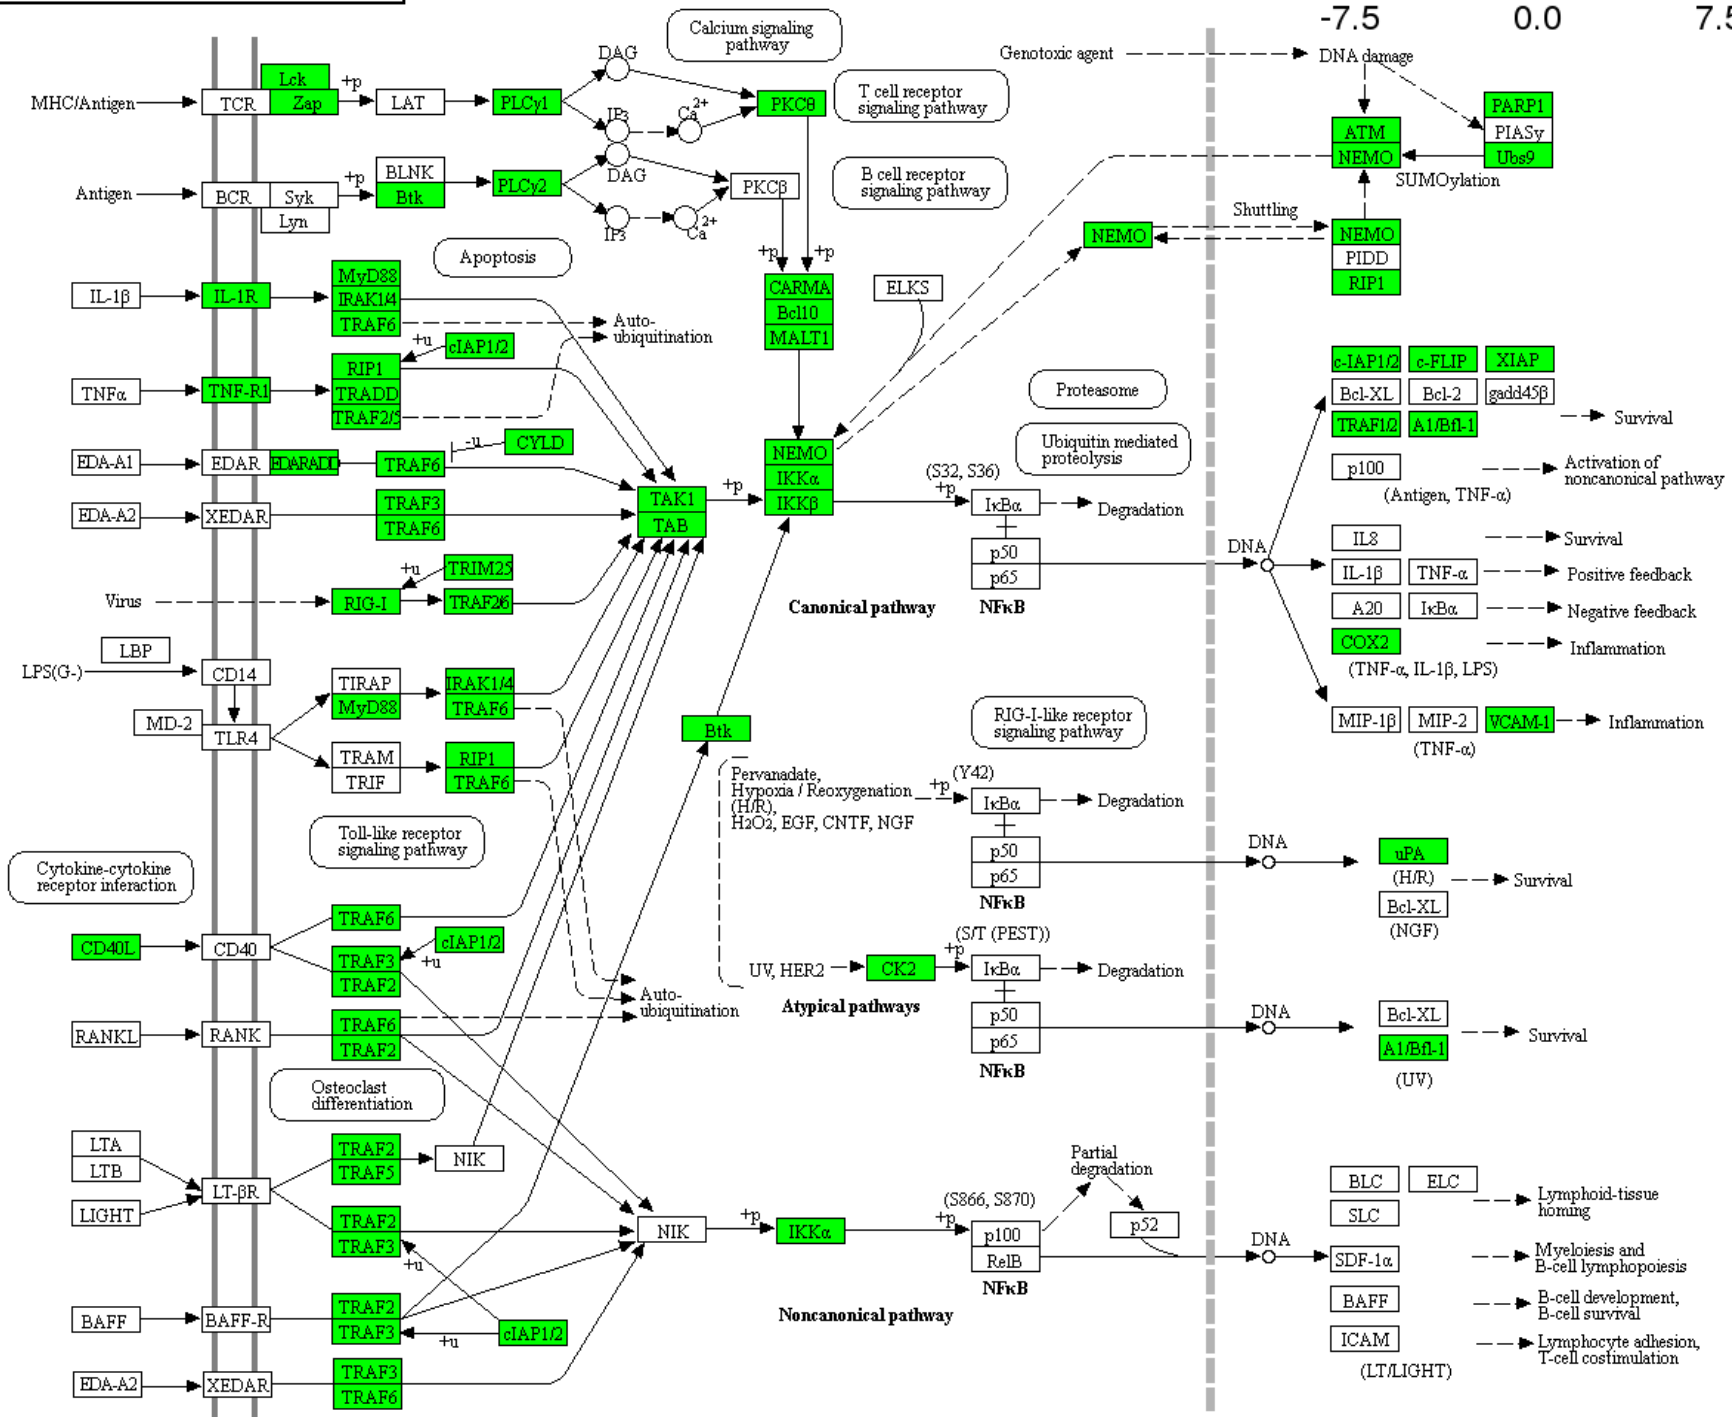

Data on KEGG graph  
Rendered by Pathview

PHOSPHATIDYLINOSITOL SIGNALING SYSTEM

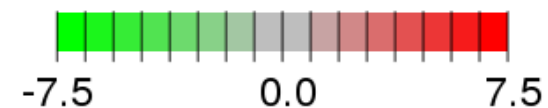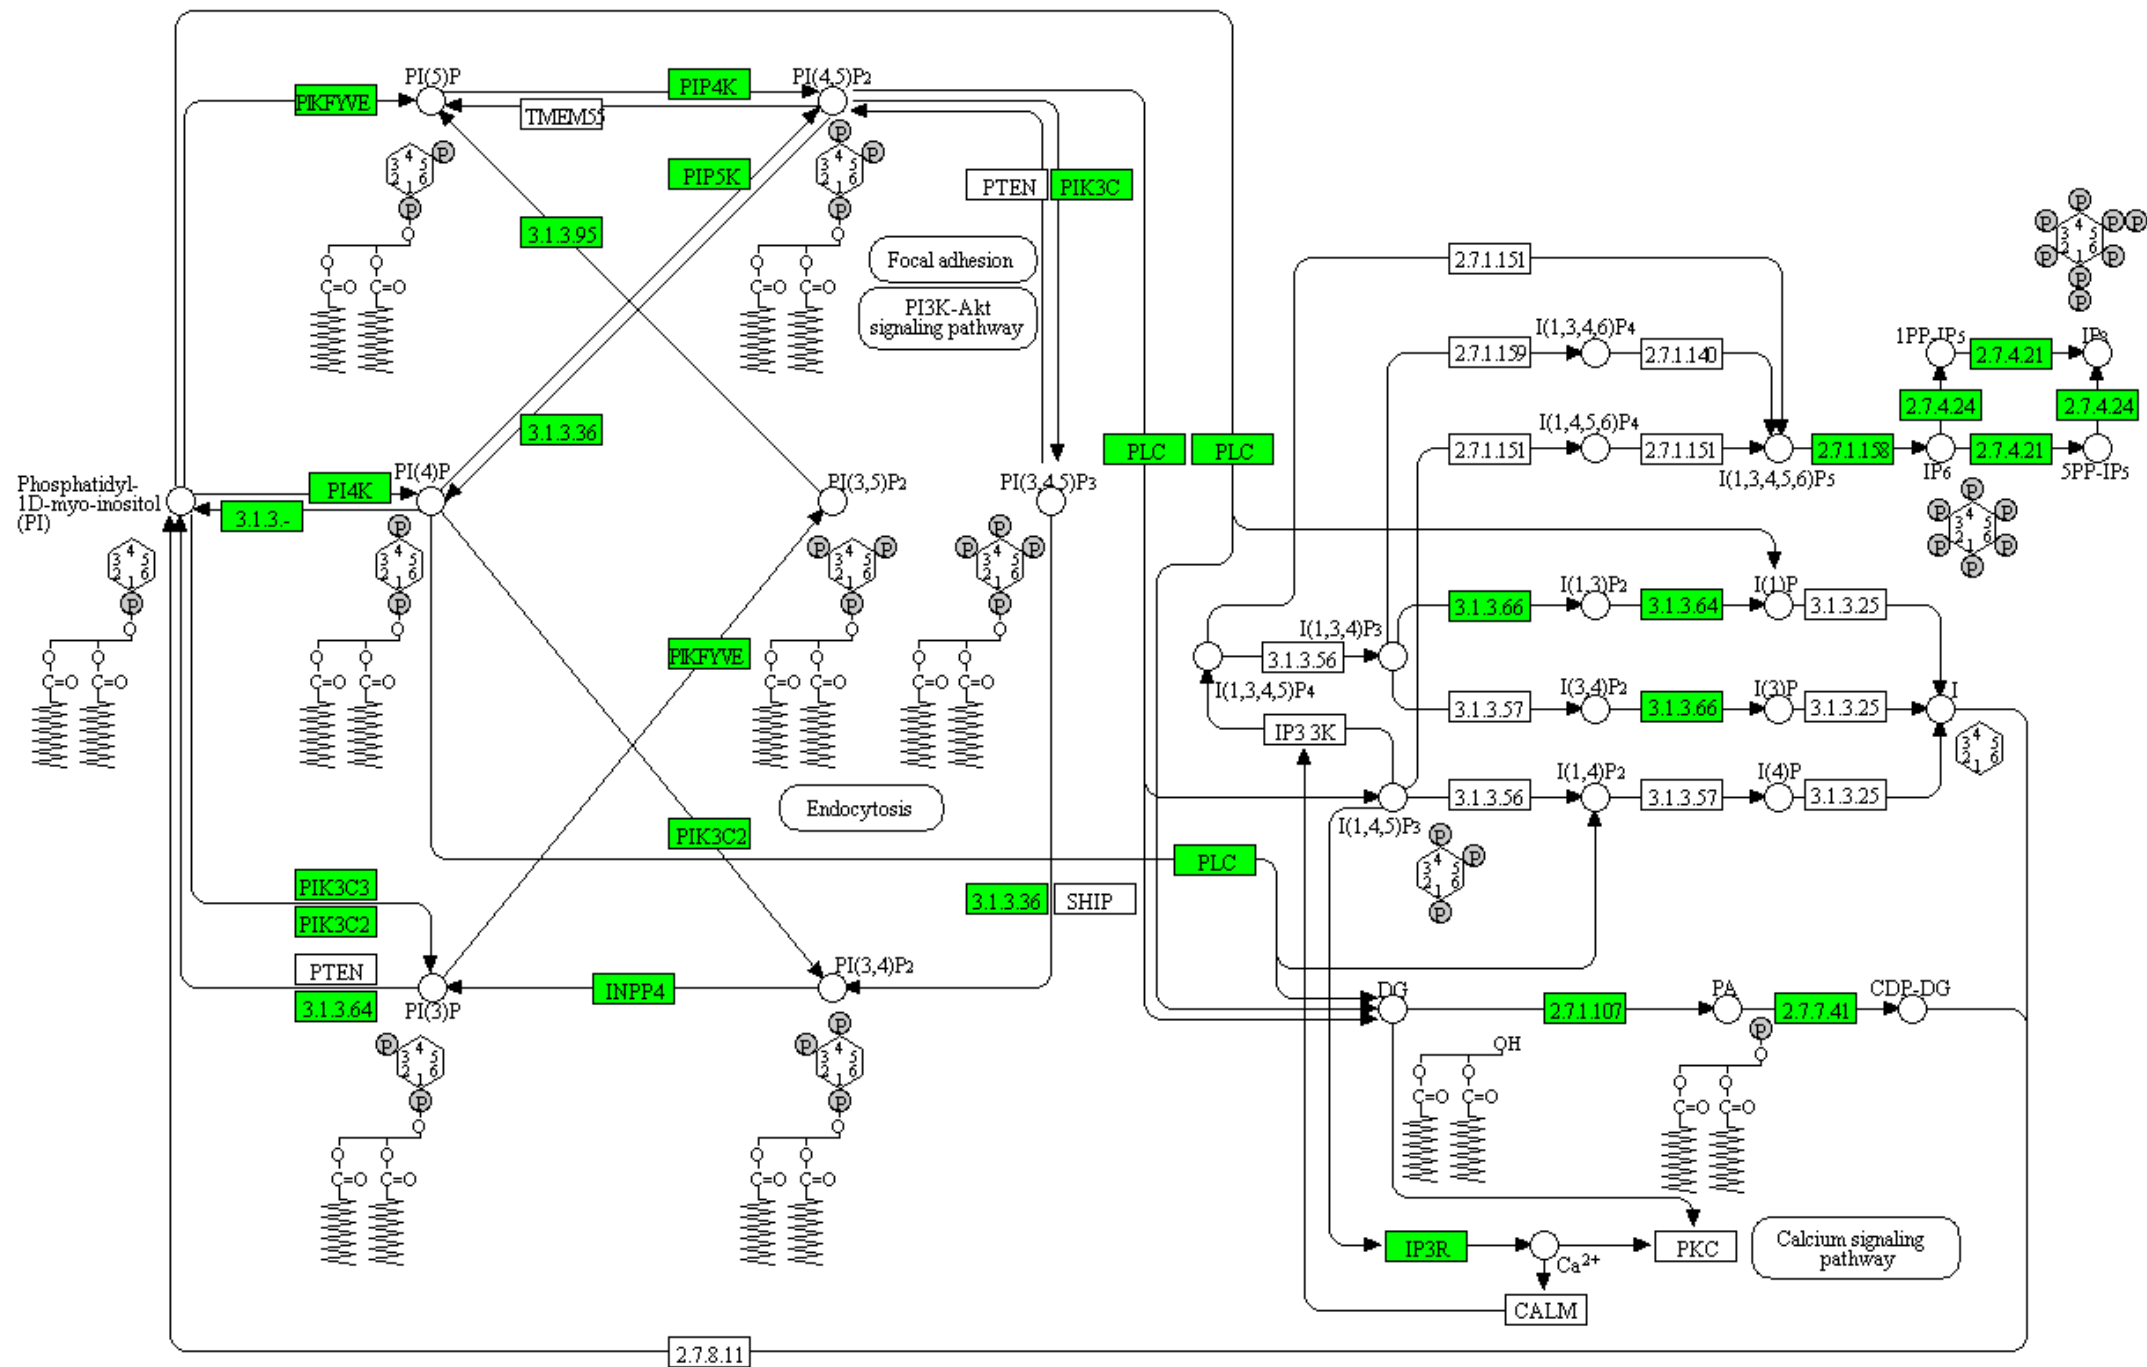

CELL CYCLE

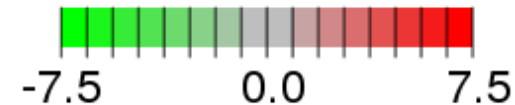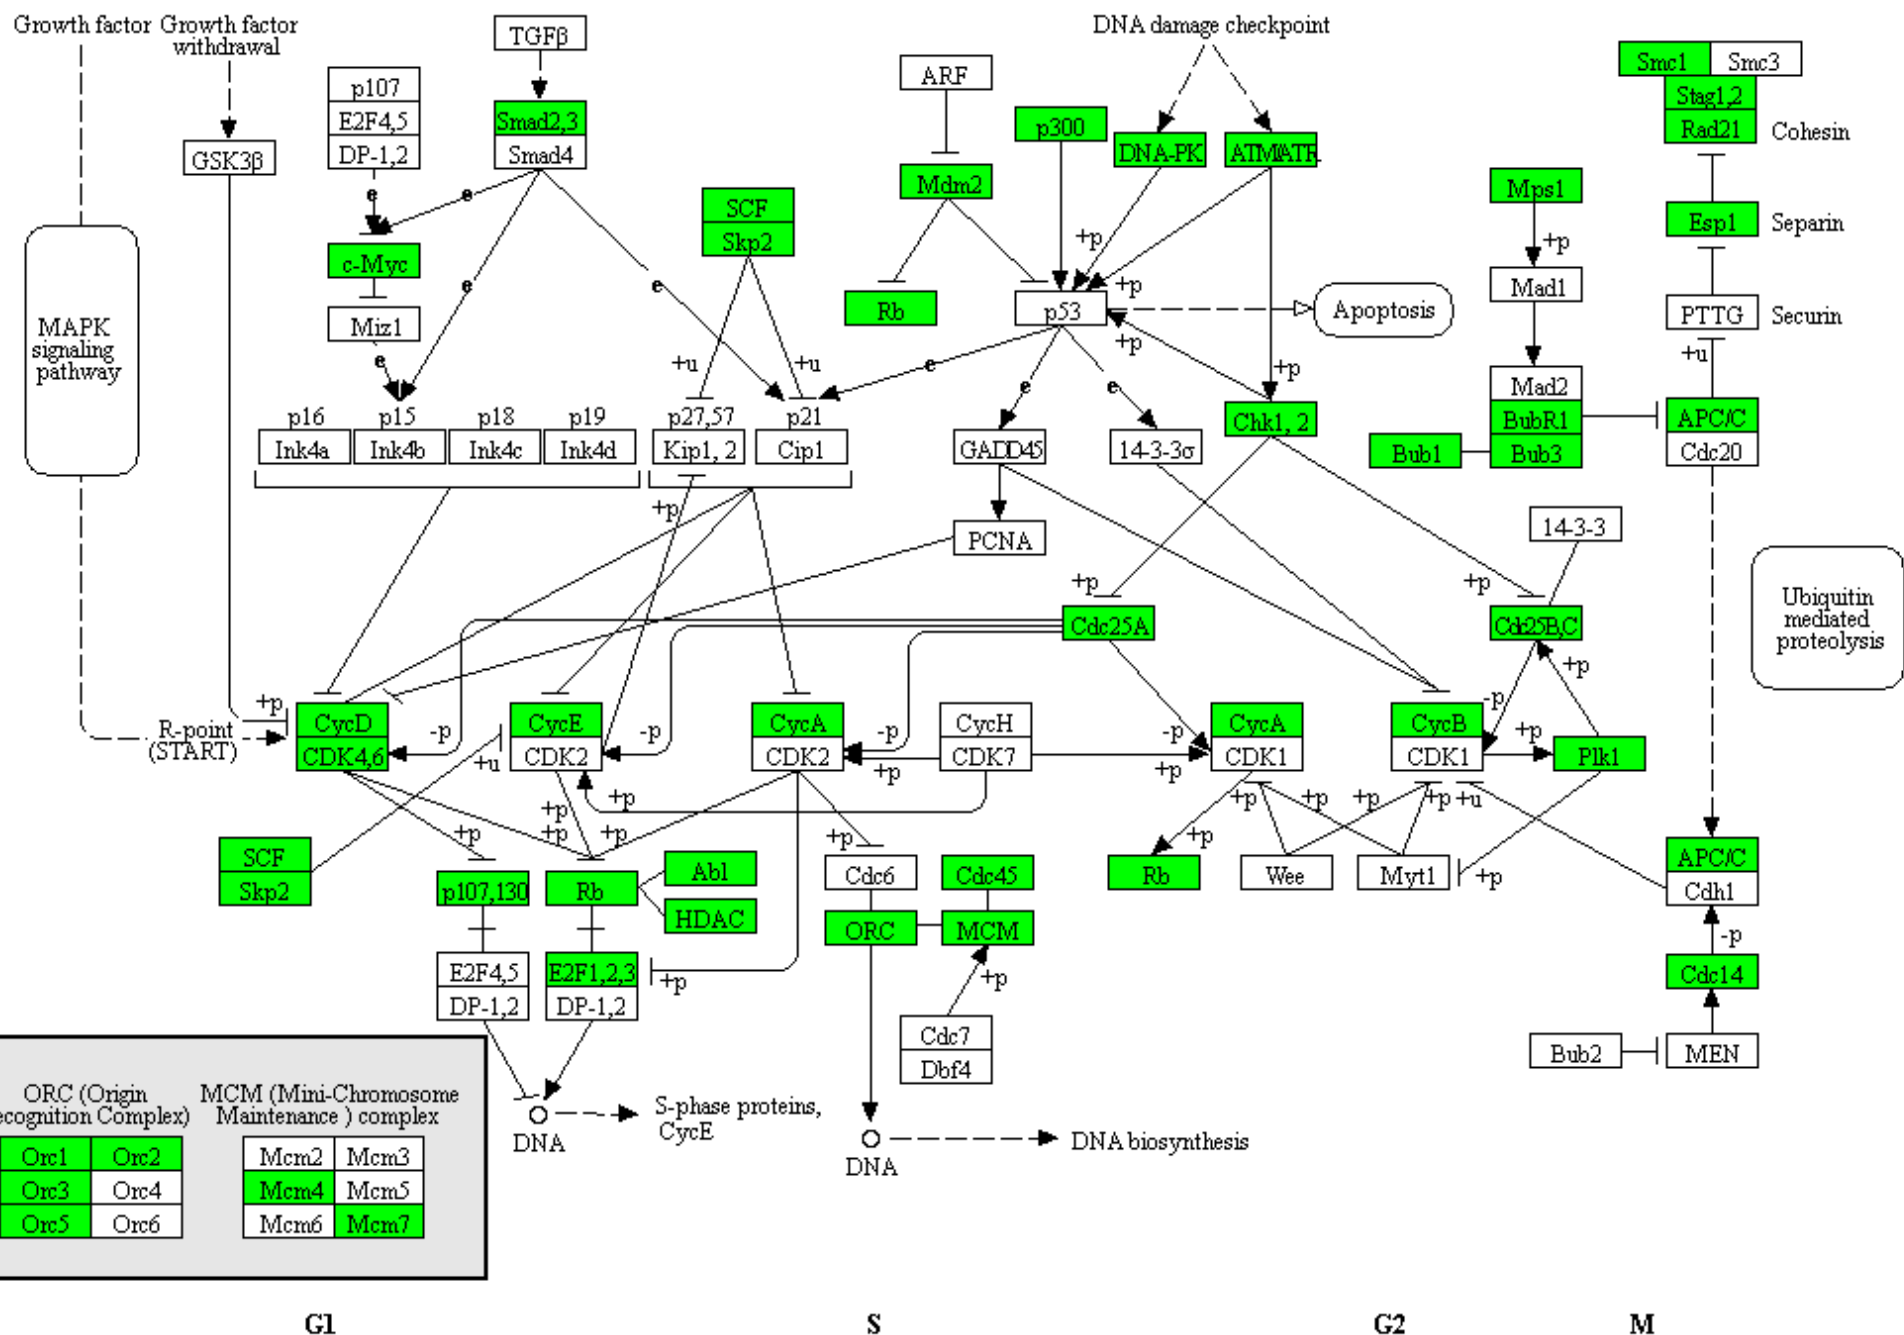

# UBIQUITIN MEDIATED PROTEOLYSIS

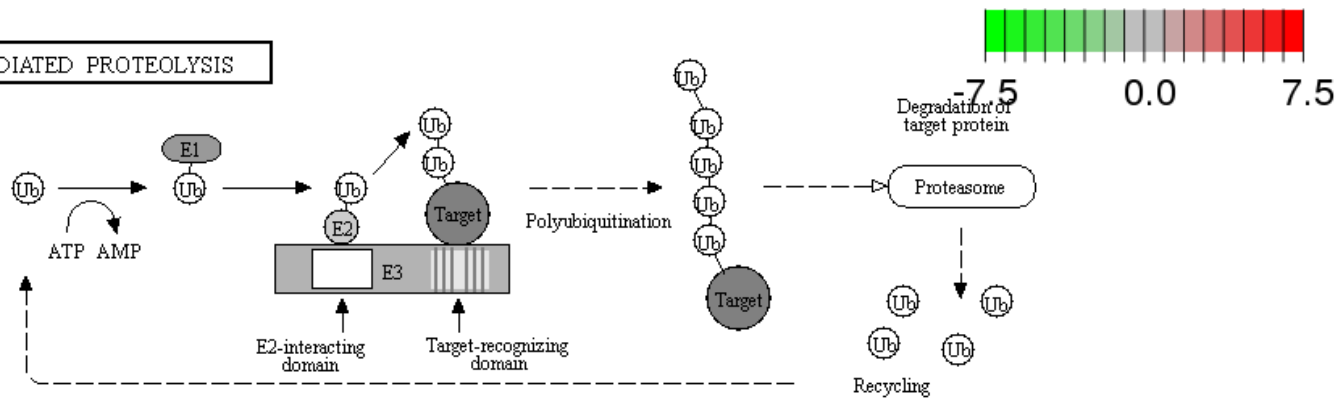

**E1**  
(Ubiquitin-activating enzyme)

UBE1 UBE1A UBE1B UBE1C

**E2**  
(Ubiquitin-conjugating enzyme)

UBE2A UBE2B UBE2C UBE2D UBE2E UBE2F UBE2G1 UBE2G2 UBE2H  
 UBE2I UBE2J1 UBE2J2 UBE2L3 UBE2L6 UBE2M UBE2N UBE2O  
 UBE2Q UBE2R UBE2S UBE2U UBE2W UBE2Z HIP2 AFCL1CN

**E3**  
(Ubiquitin ligase)

HECT type E3

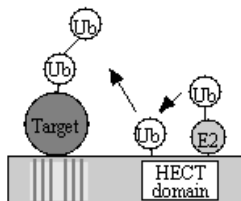

E6AP UBE3B UBE3C Smurf Itch  
 WWP1 WWP2 TRIP12 NEDD4 ARF-BP1  
 EDD1 HERC1 HERC2 HERC3 HERC4

U-box type E3

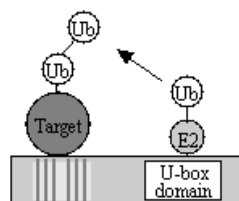

UBE4A UBE4B CHIP  
 CYC4 PRP19 UIP5

single RING-finger type E3

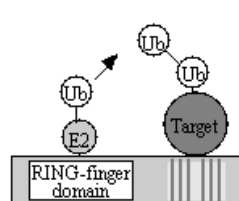

Mdm2 CBL Parkin SHAH-1 PML TRAF6 MEKK1  
 COP1 PIRH2 cIAPs PIAS SYVN NHLRC1 AIRE  
 MGRN1 BRCA1 FANCL MID1 Trim32 Trm37

multi subunit RING-finger type E3

Cullin-Rbx E3

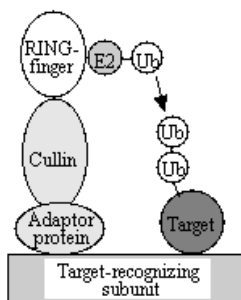

|              | RING finger | Cullin | Adaptor protein | Target recognizing subunit |
|--------------|-------------|--------|-----------------|----------------------------|
| SCF complex  | RBX1        | Cul1   | Skp1            | F-box                      |
| ECV complex  | RBX1        | Cul2   | EloB<br>EloC    | VHLbox                     |
| Cul3 complex | RBX1        | Cul3   |                 | BTB                        |
| Cul4 complex | RBX1        | Cul4   |                 | DDB1<br>DCAF               |
| ECS complex  | RBX2        | Cul5   | EloB<br>EloC    | SOC3box                    |
| Cul7 complex | RBX1        | Cul7   | Skp1            | Fbxw8                      |

APC/C

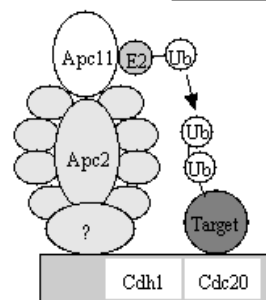

| RING finger | Cullin | Adaptor protein | Target recognizing subunit | Other subunits                                                                |
|-------------|--------|-----------------|----------------------------|-------------------------------------------------------------------------------|
| Apc11       | Apc2   | ?               | Cdc20                      | Apc1 Apc3<br>Cdh1 Apc4 Apc5<br>Apc6 Apc7<br>Apc8 Apc9<br>Apc10 Apc12<br>Apc13 |



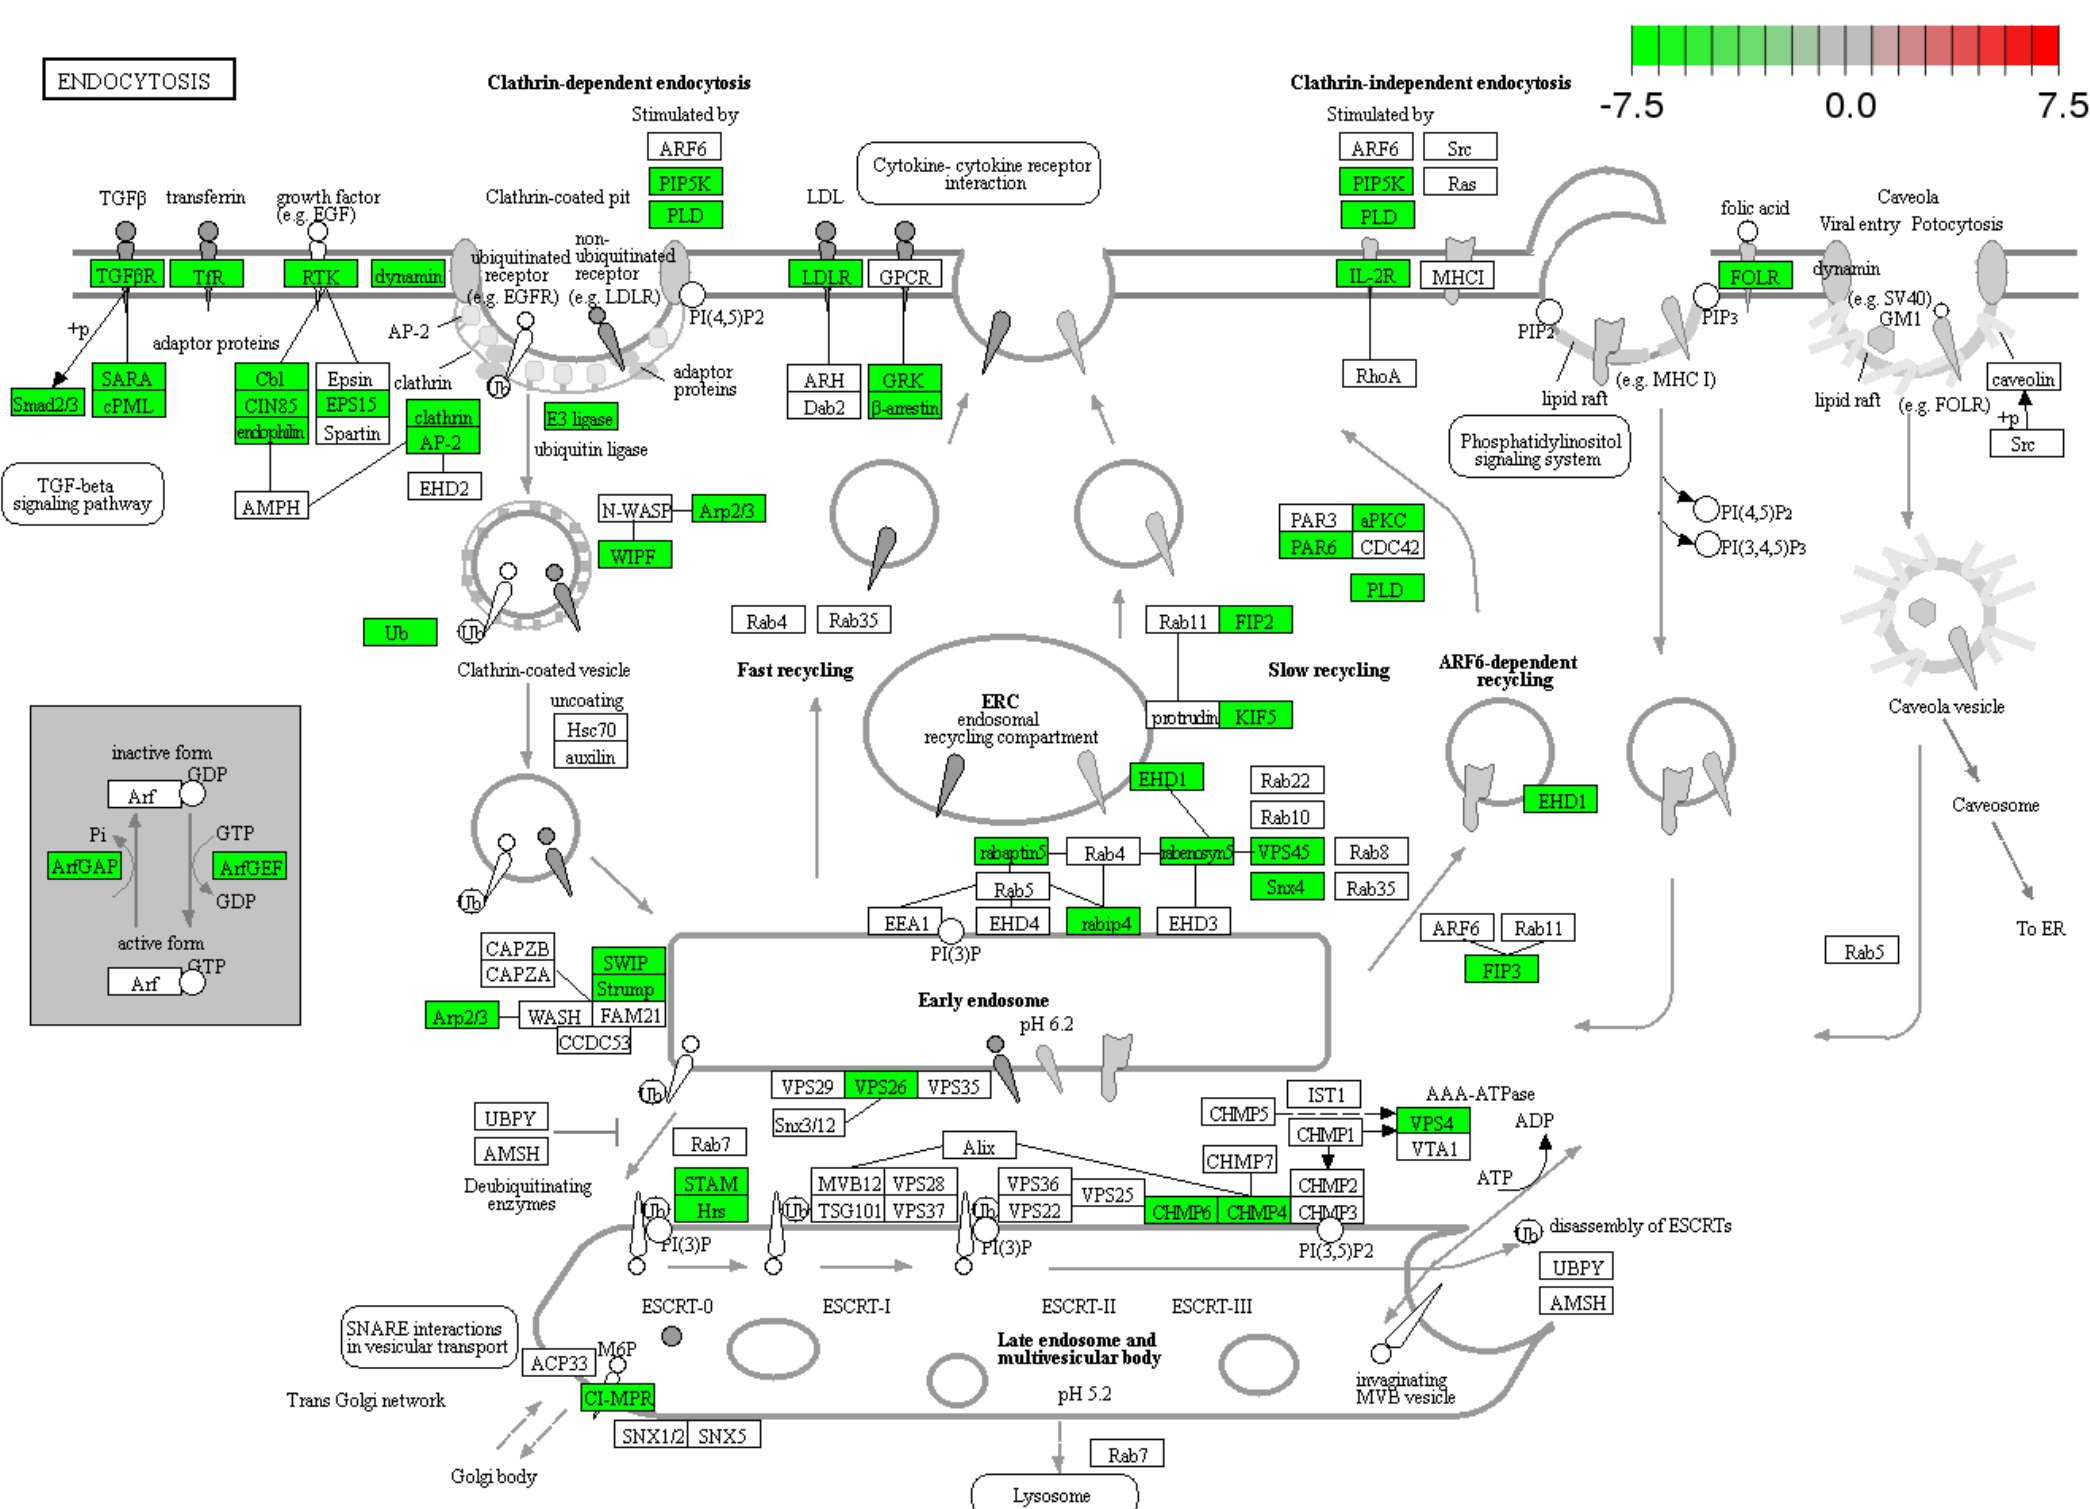

PI3K-AKT SIGNALING PATHWAY

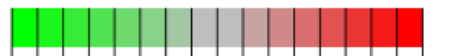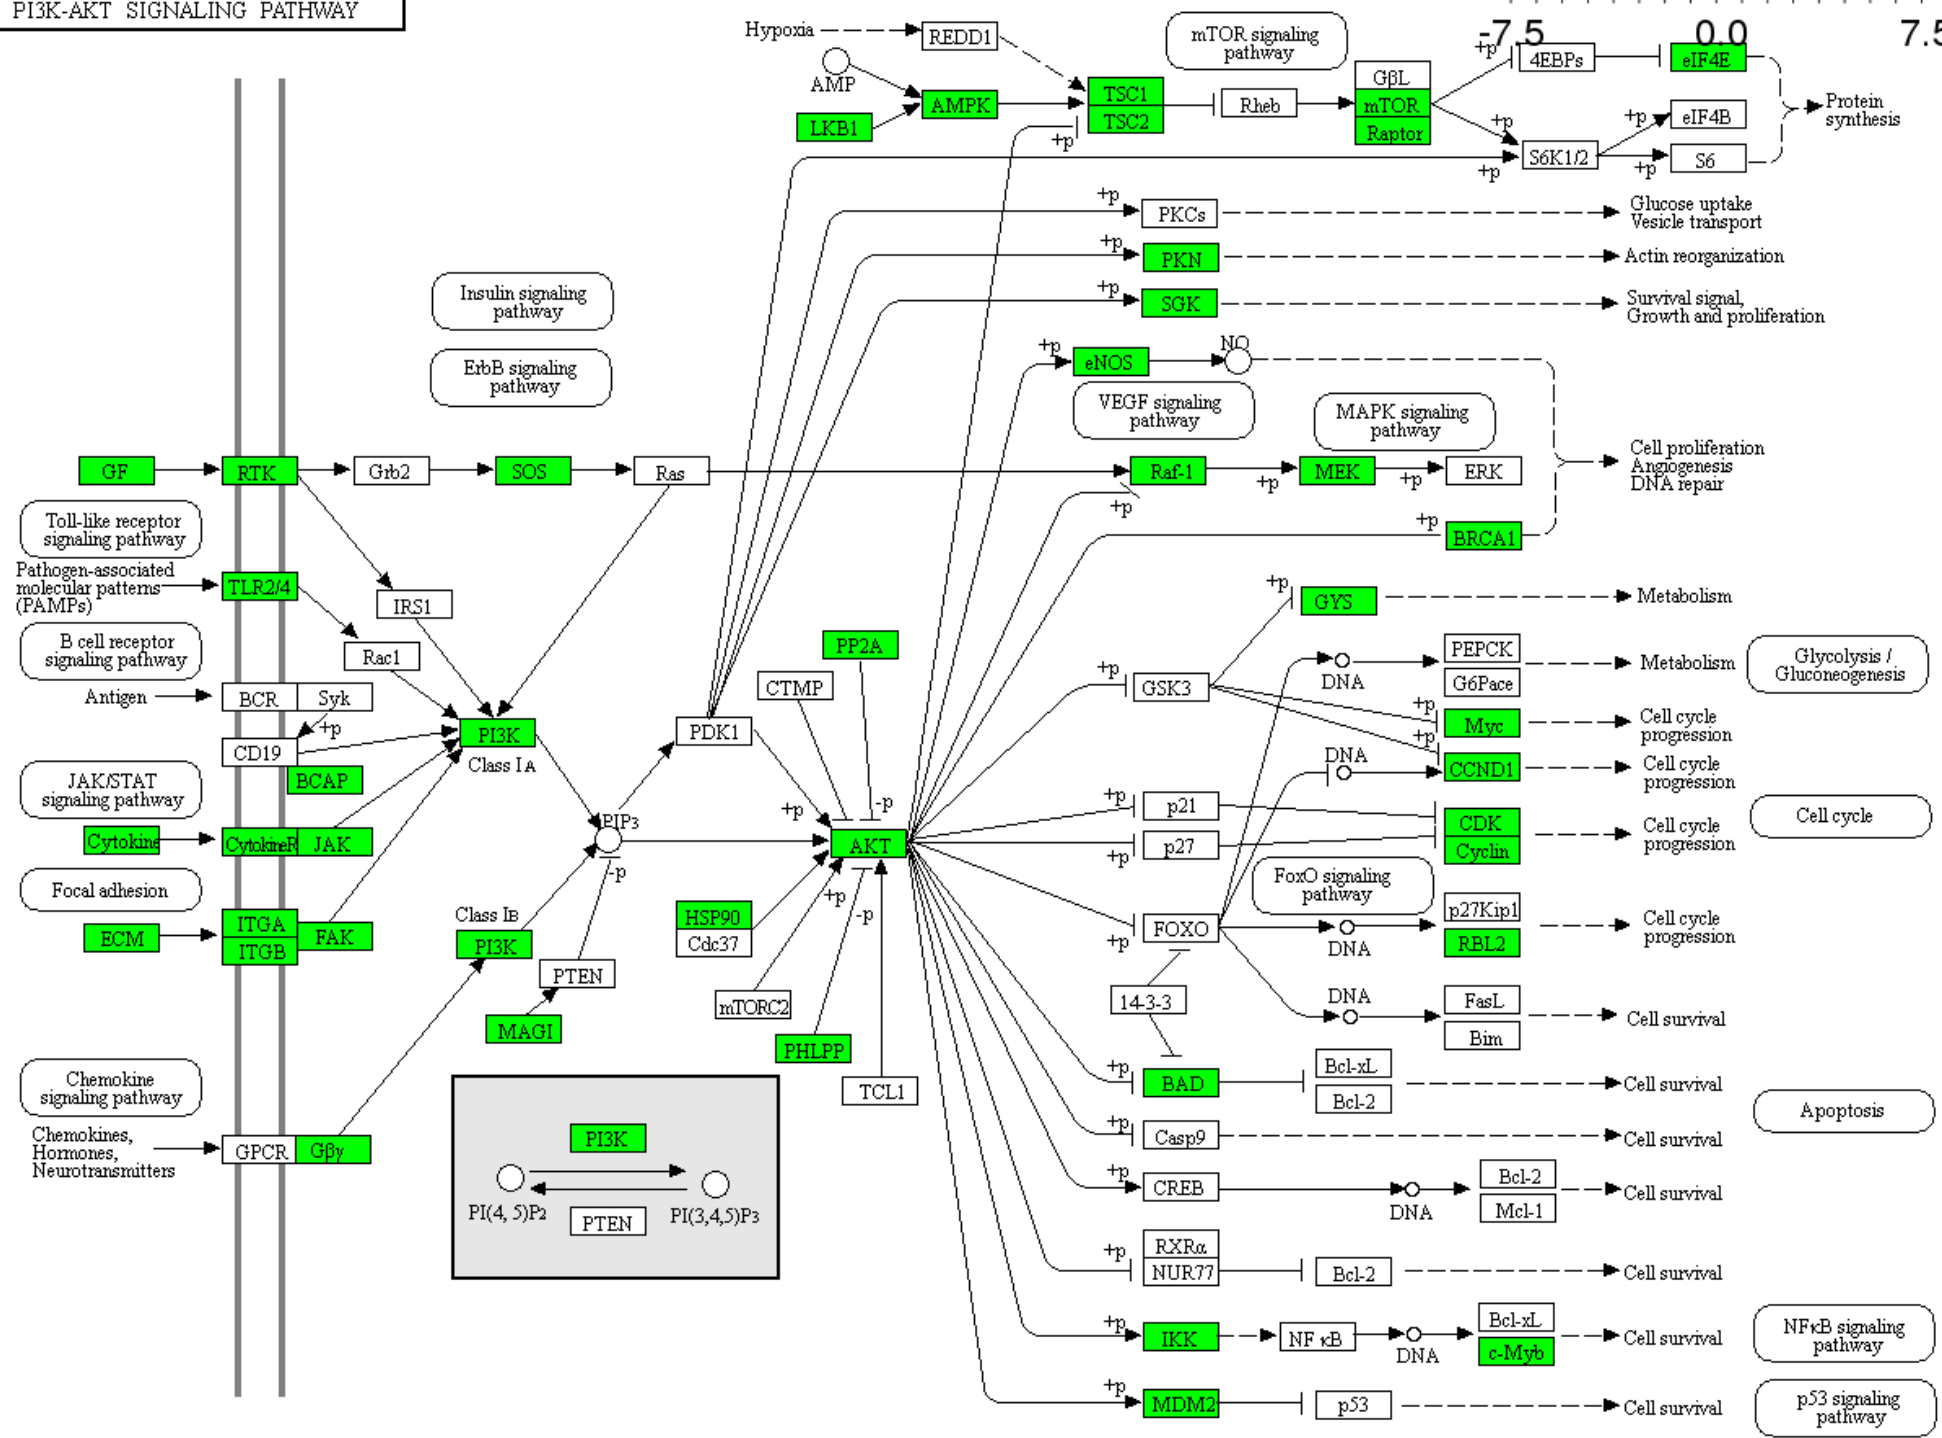

APOPTOSIS

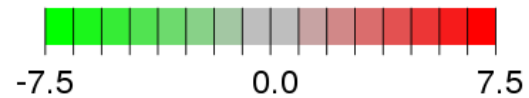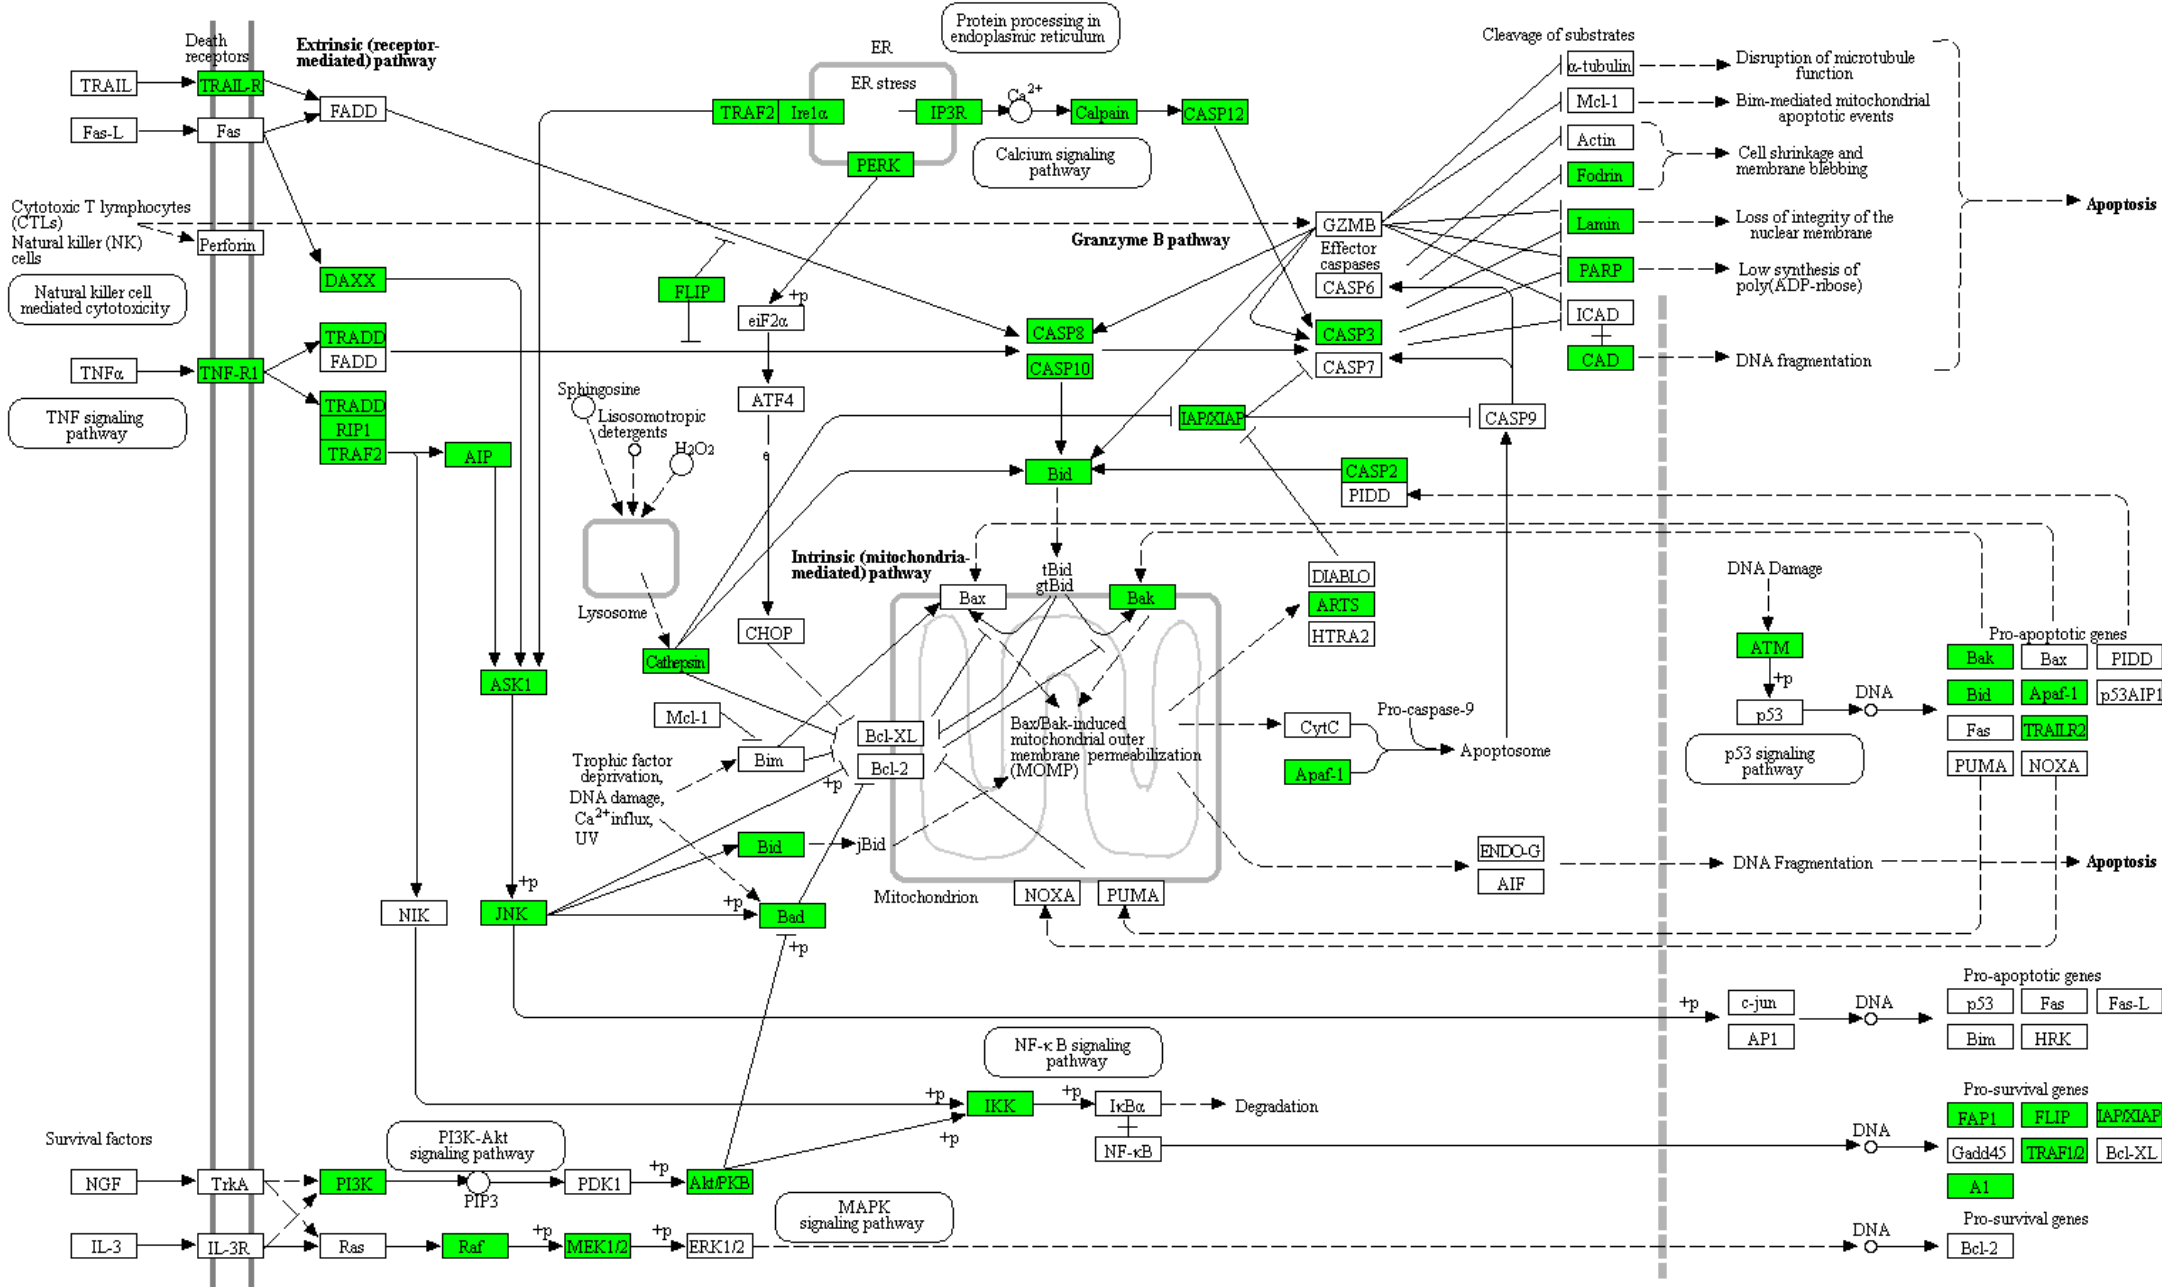

AXON GUIDANCE

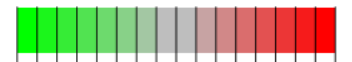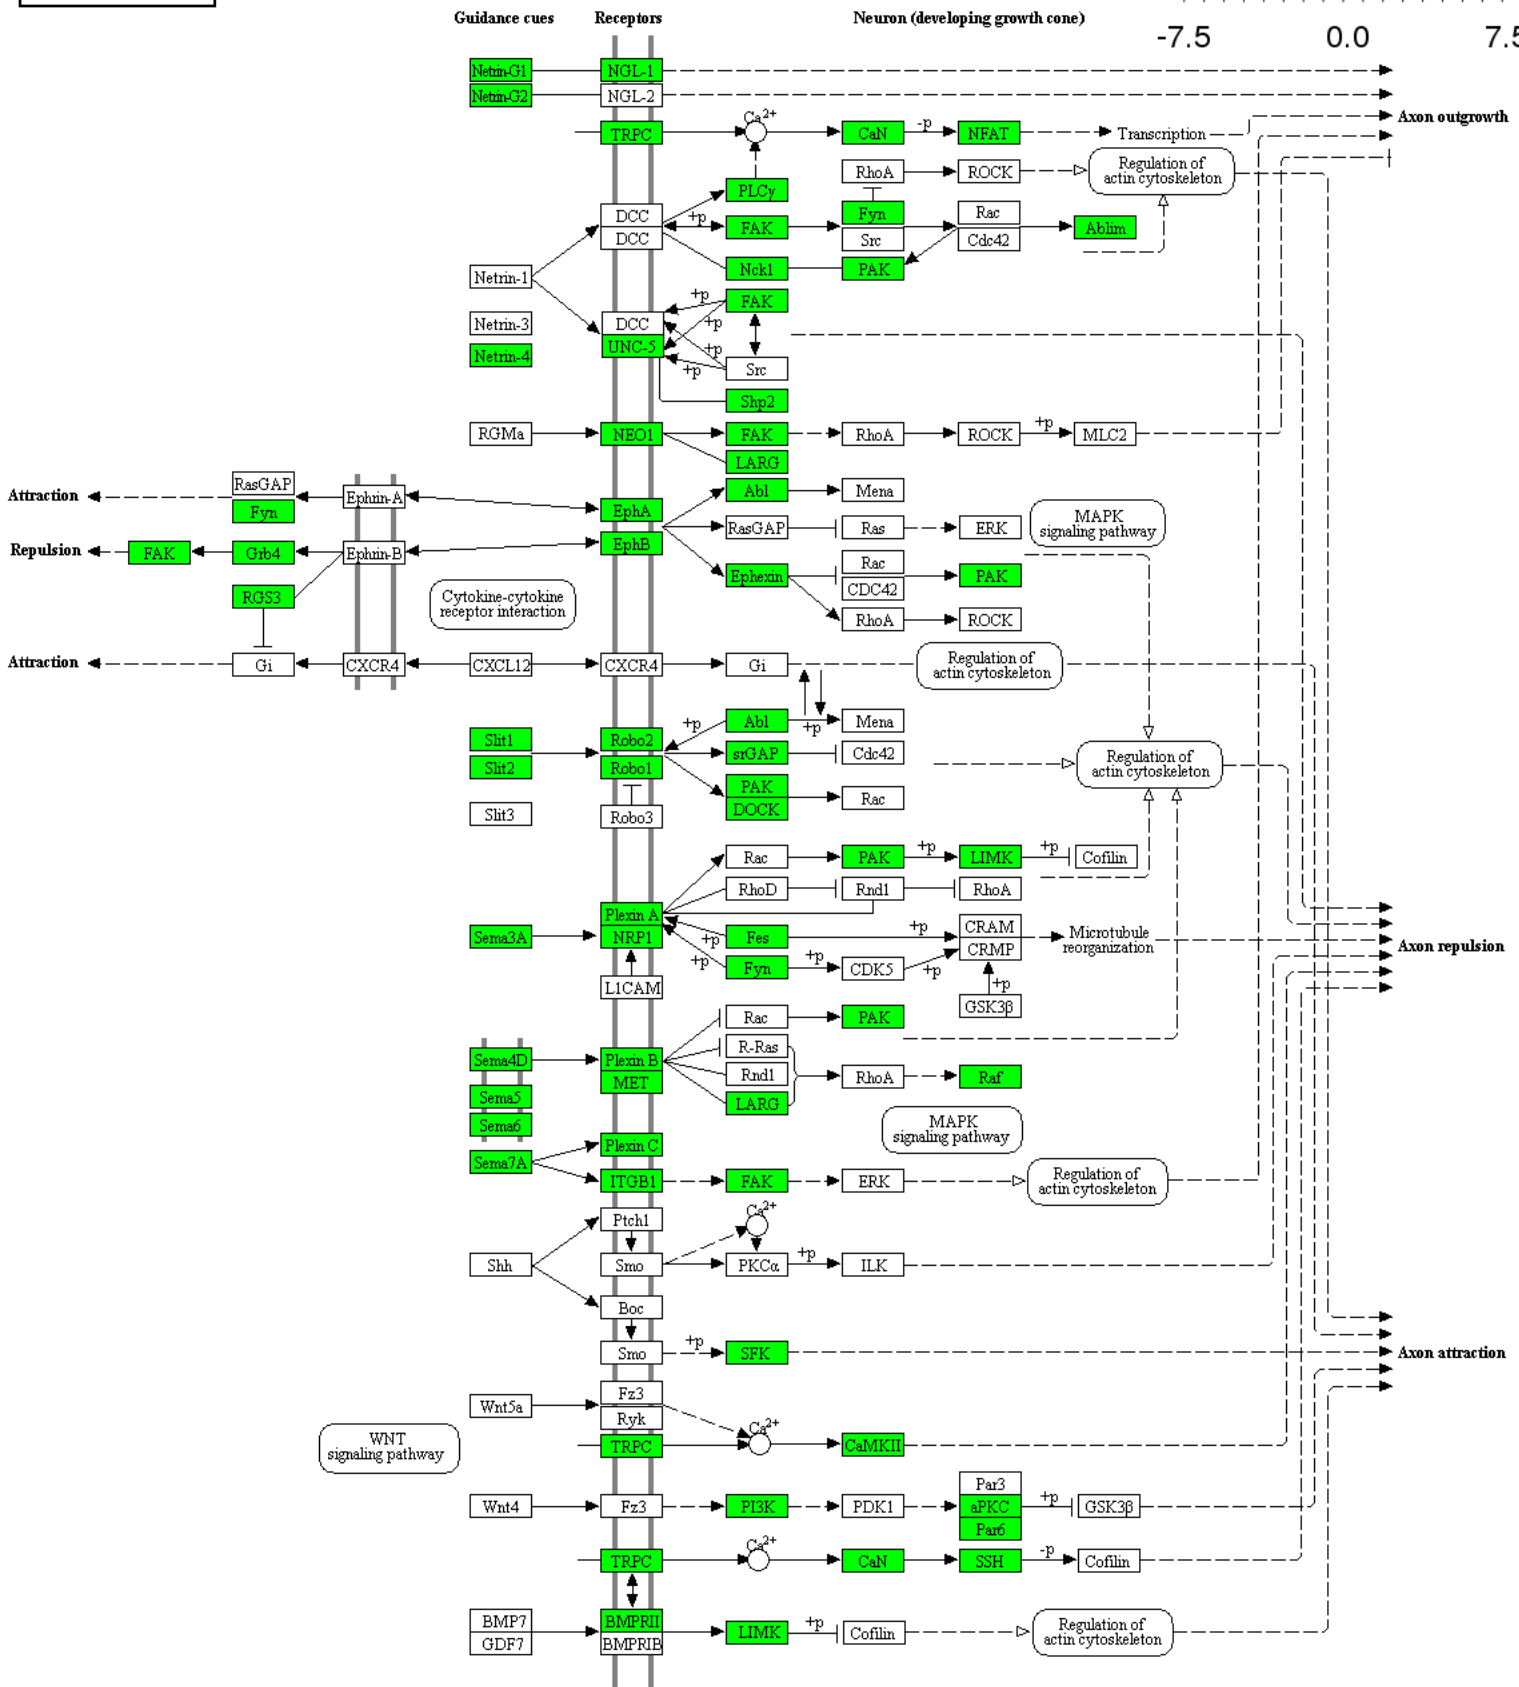

**FOCAL ADHESION**

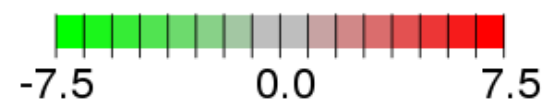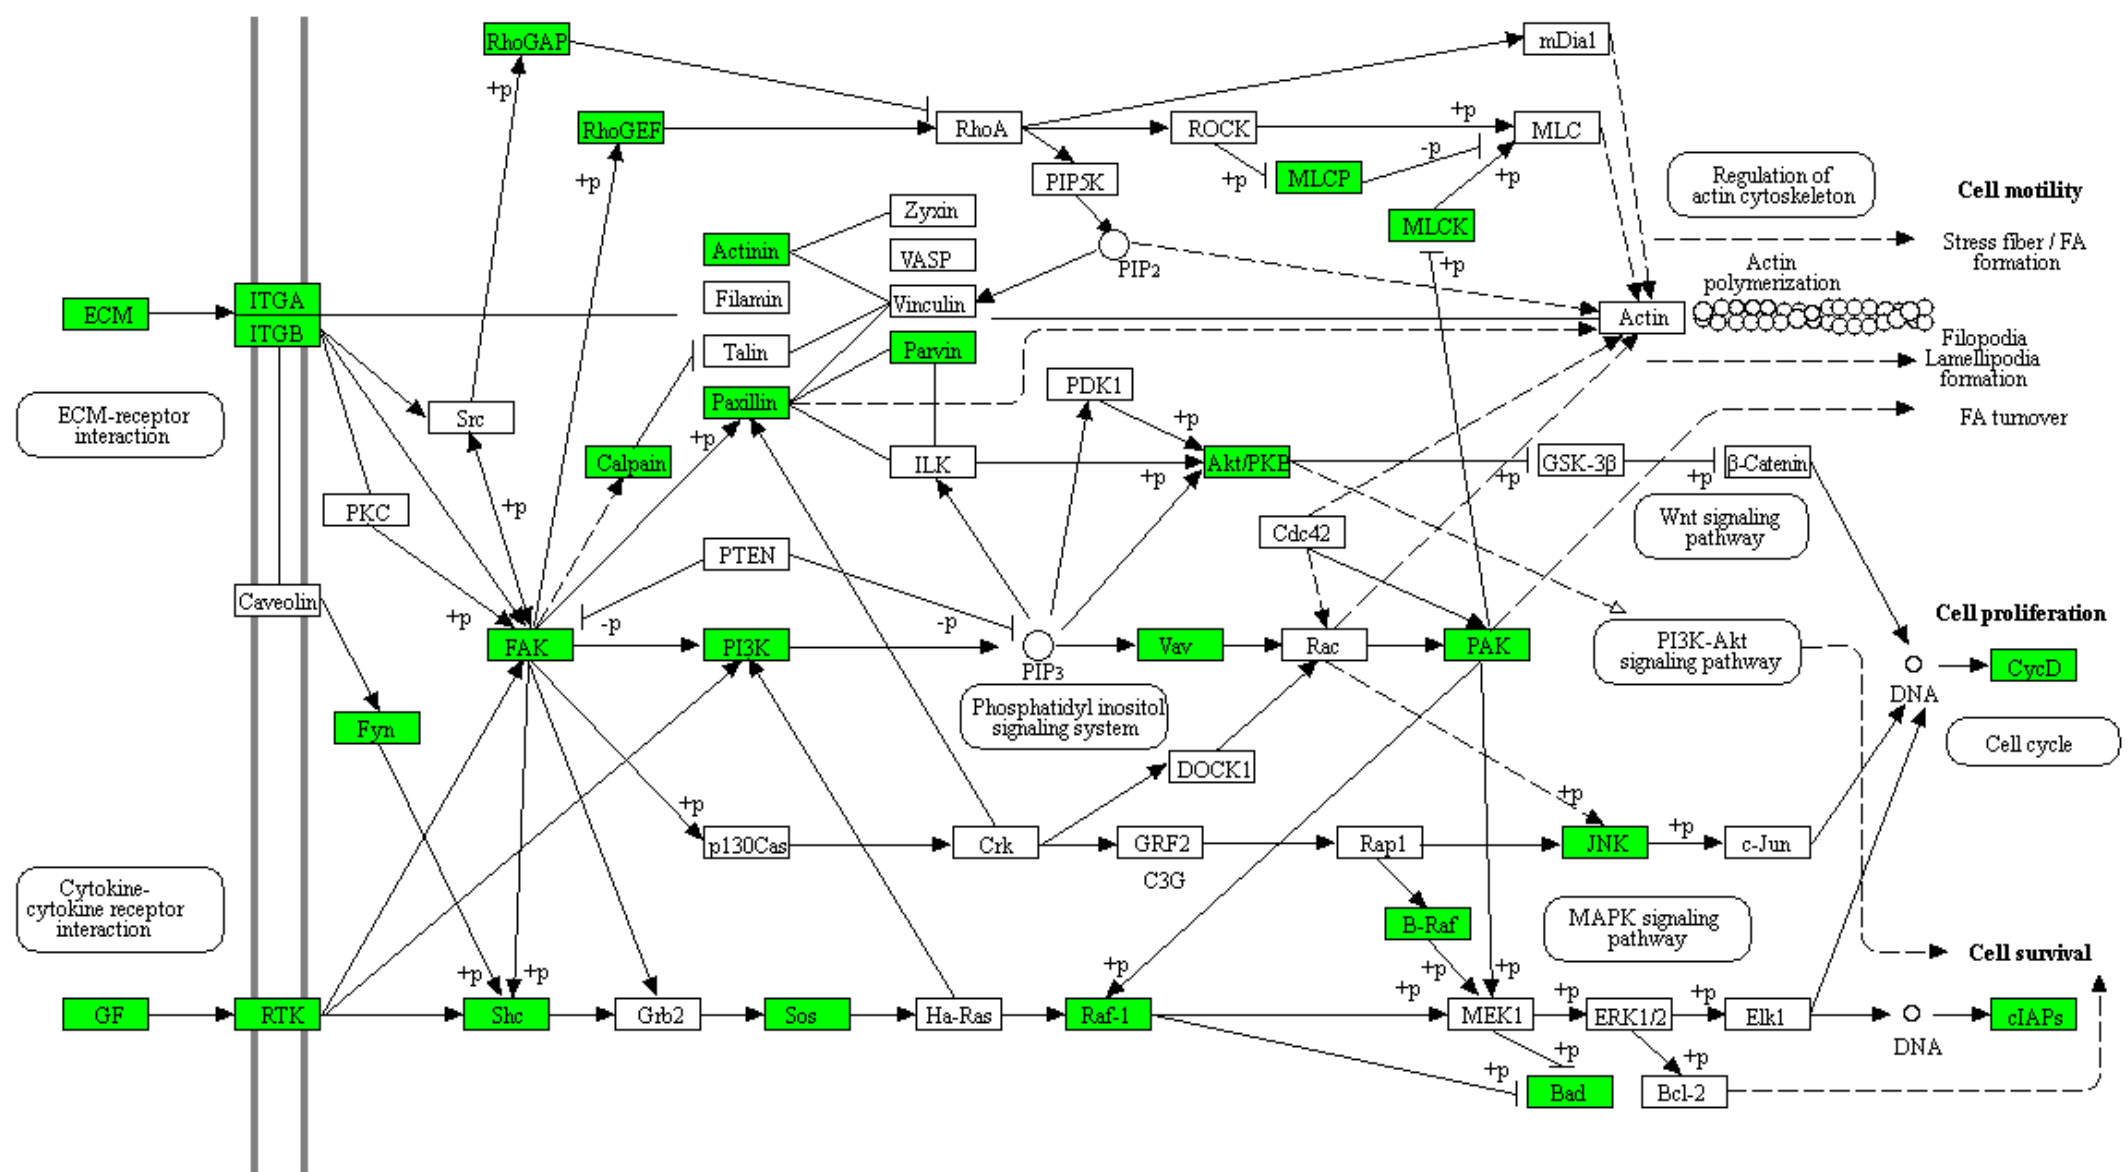

ECM-RECEPTOR INTERACTION

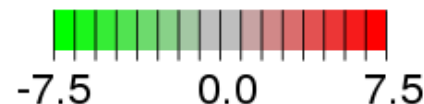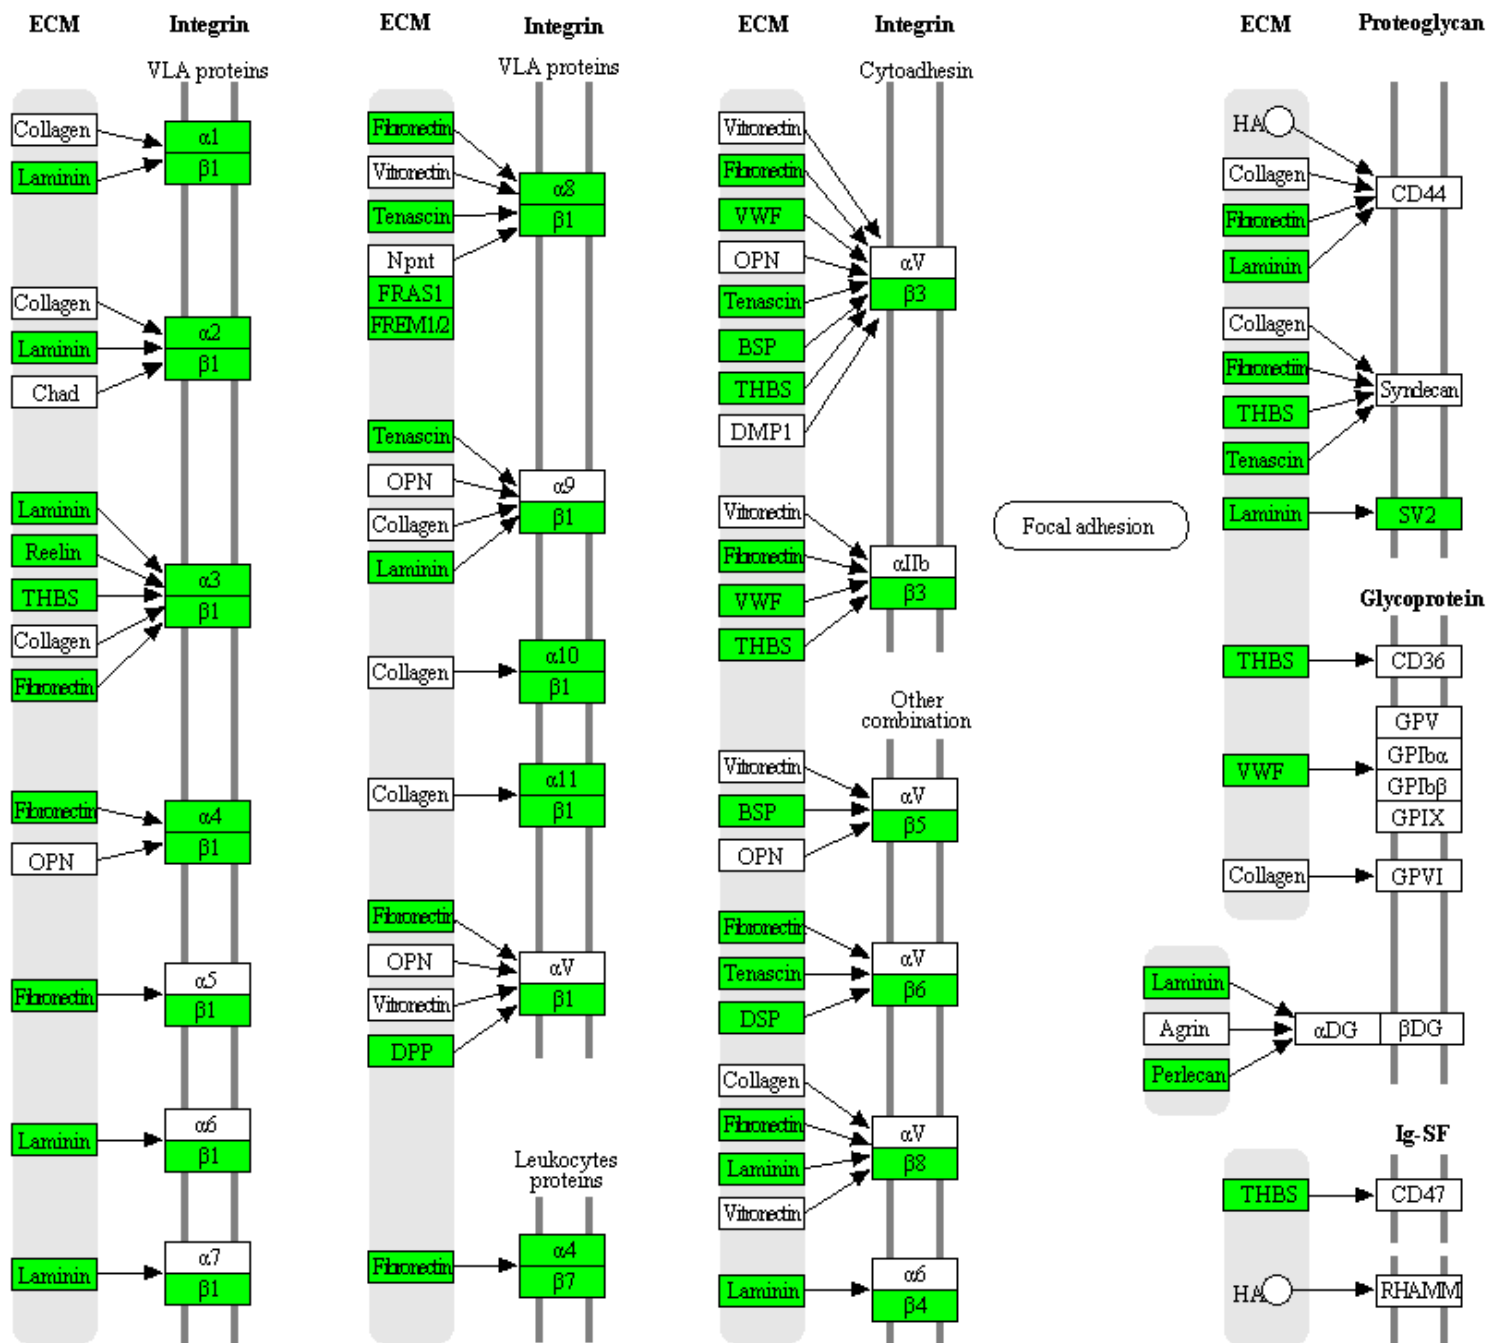

COMPLEMENT AND COAGULATION CASCADES

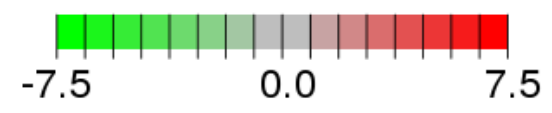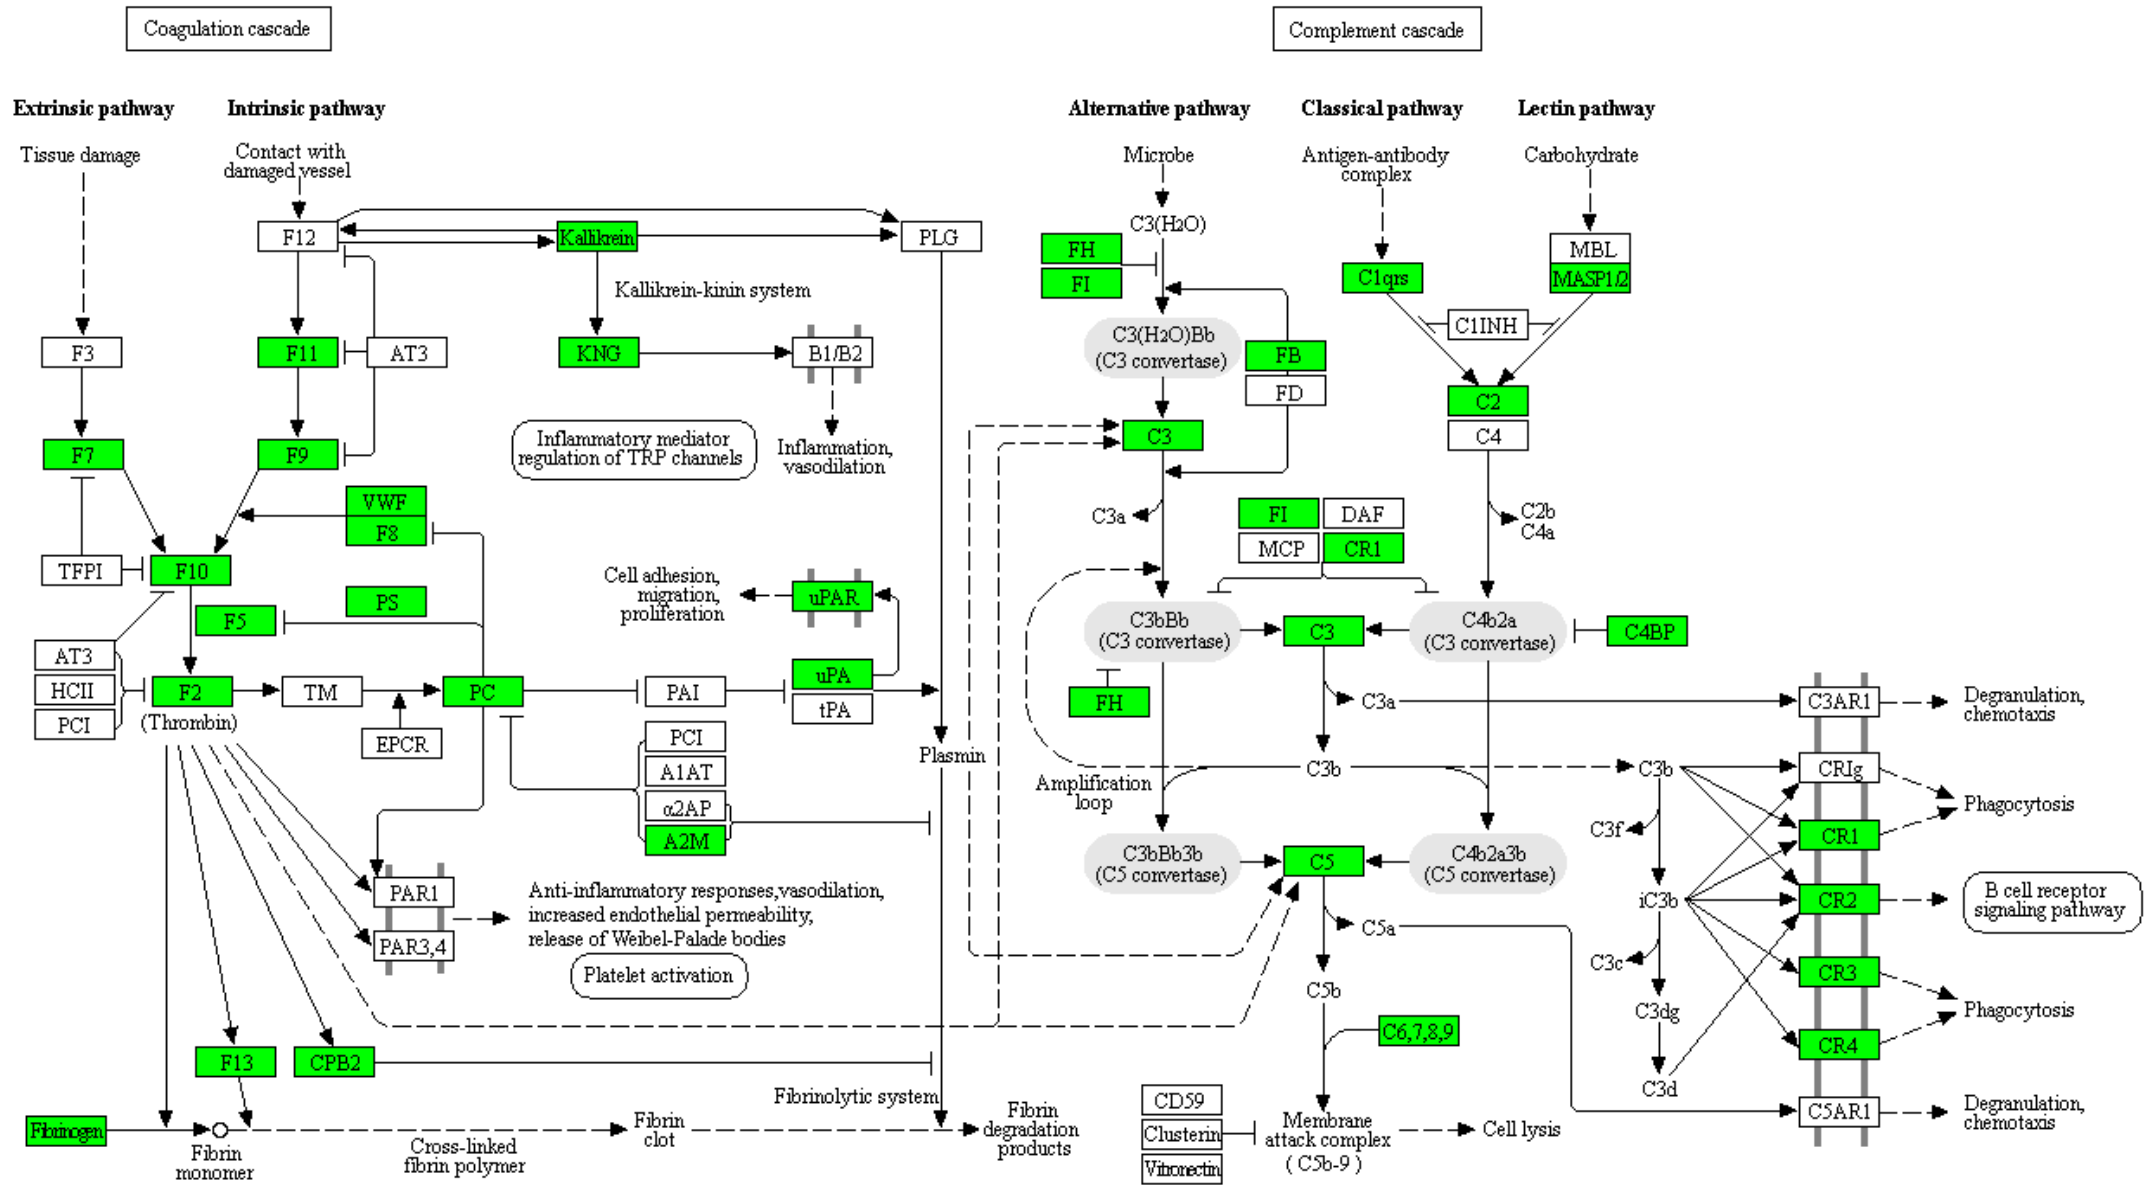

Data on KEGG graph  
Rendered by Pathview

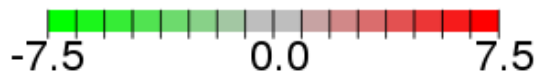

JAK-STAT SIGNALING PATHWAY

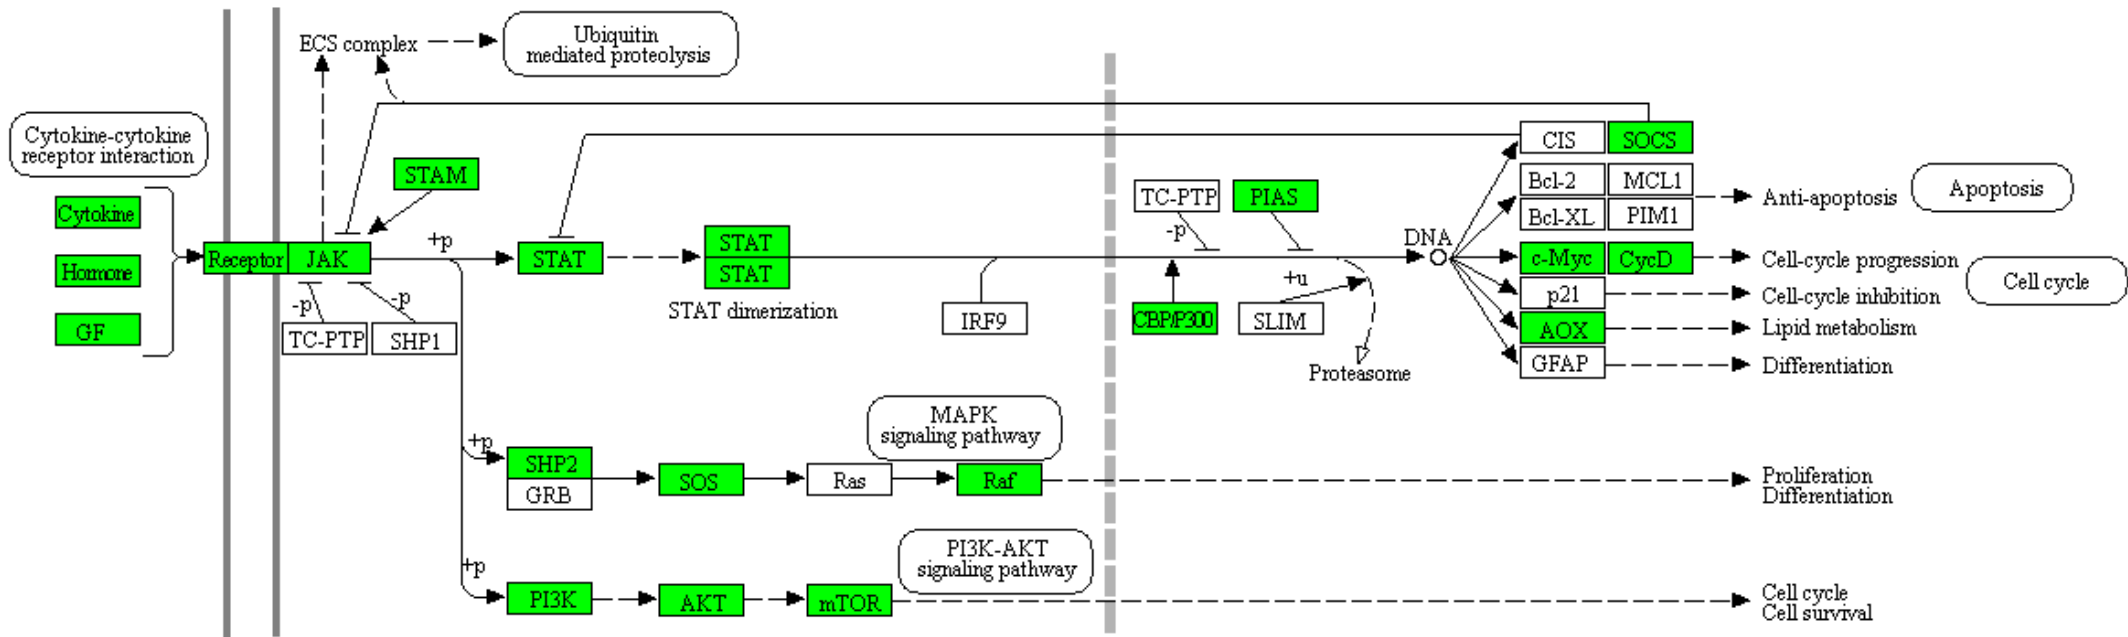



INSULIN SIGNALING PATHWAY

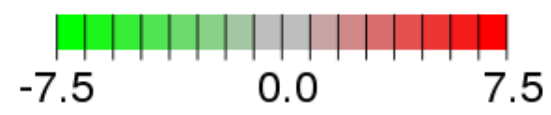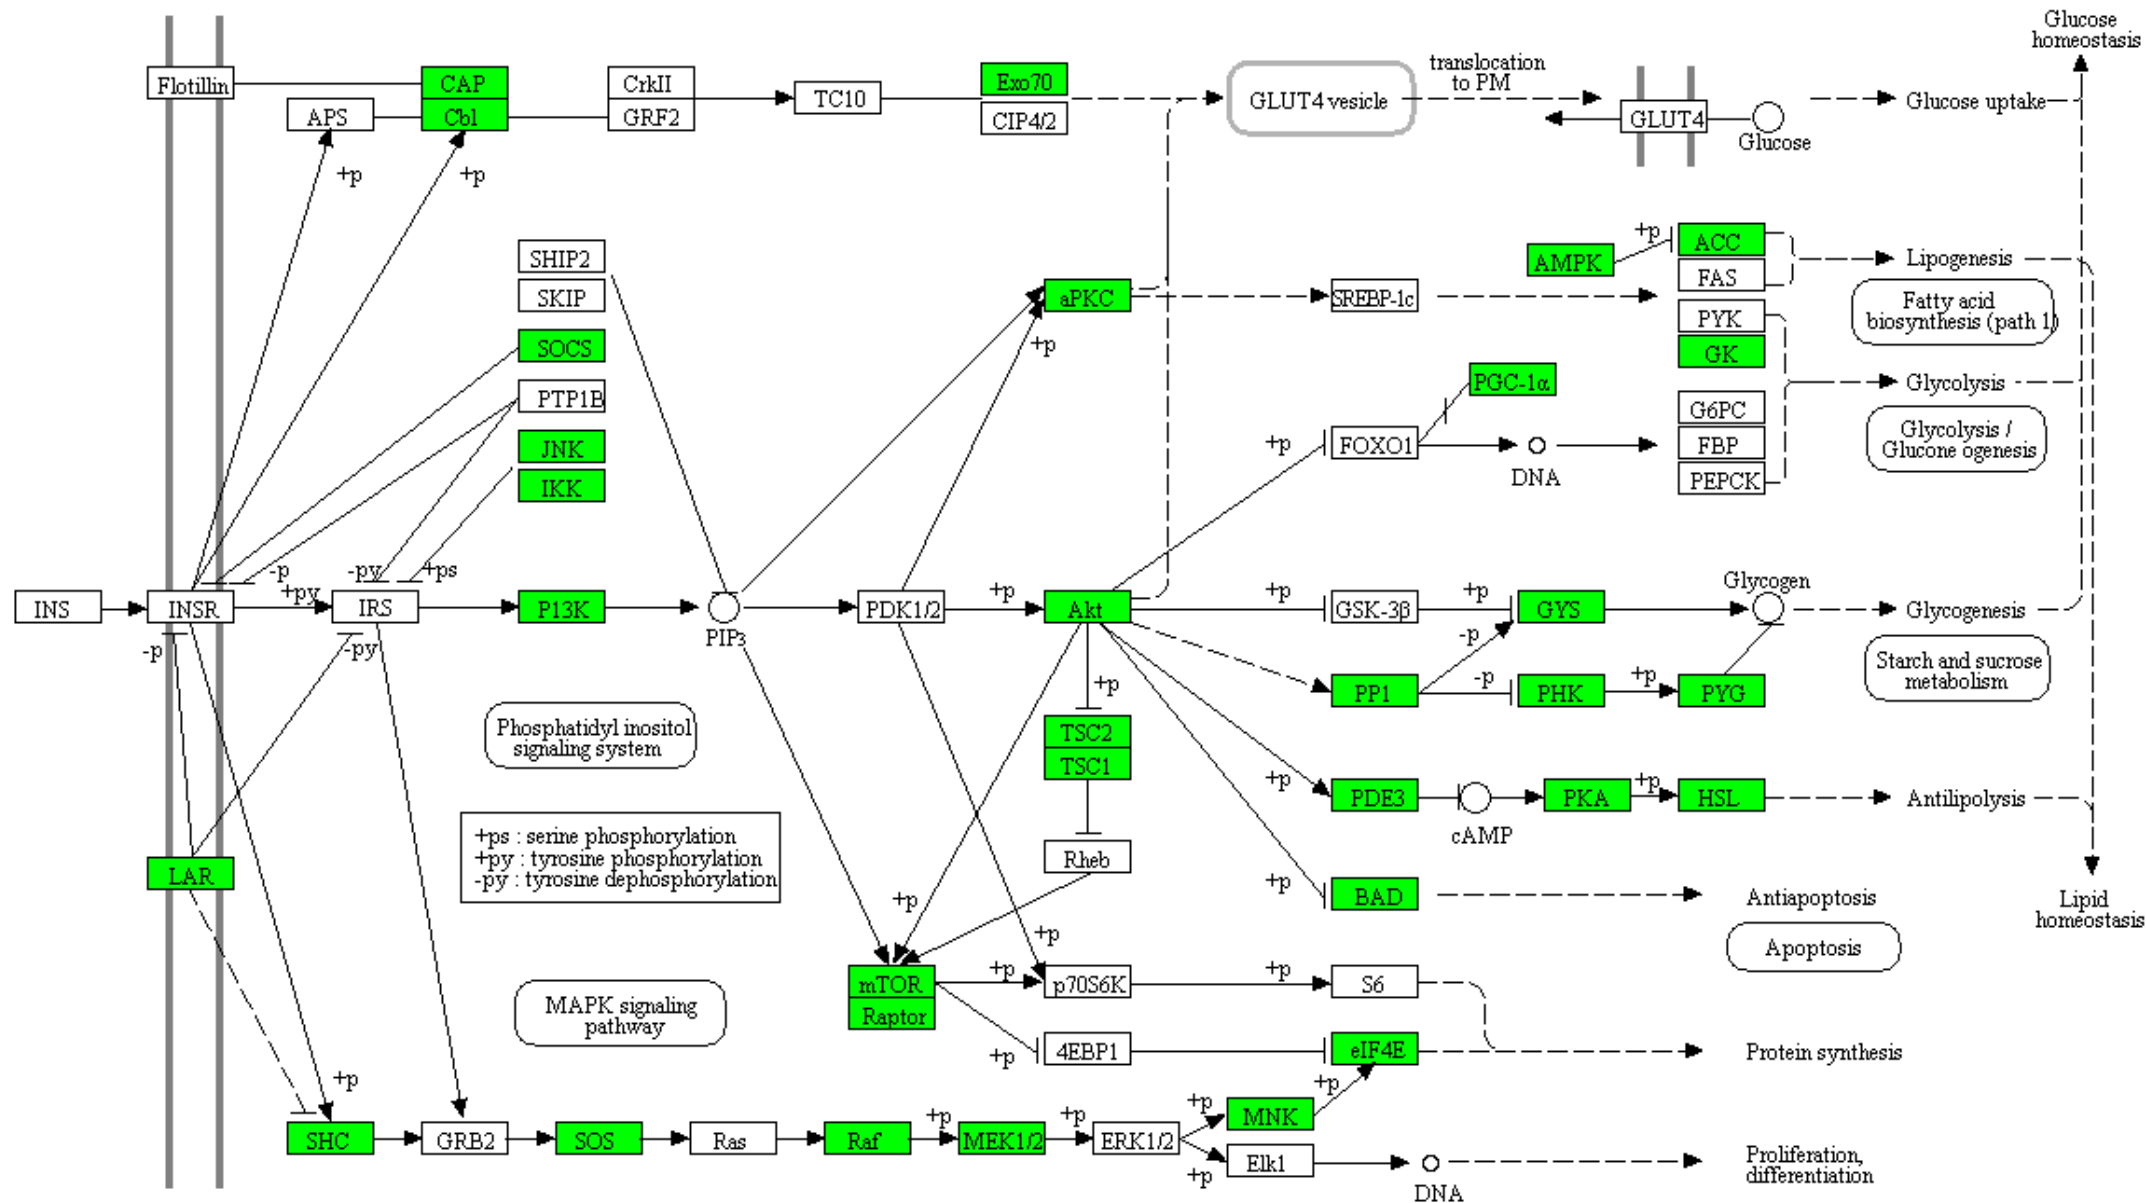

Supplement: Supplemental_Fig_S1.pdf [file Supplemental_Fig_S1.pdf]
