# Supplementary material for: In silico predictions of protein interactions between Zika virus and human host
Source: PeerJ. 2021 Aug 24;9:e11770. doi: 10.7717/peerj.11770 (PMC8395582; doi:10.7717/peerj.11770)
Supplement: Supplemental Information 10 [file peerj-09-11770-s010.xlsx]

## Sheet: FSS_Hsapiens
103 chart records
Term	Count	%	P-Value	FDR	ID Kegg
Focal adhesion	91	2.1	2.1e-14	2.7e-11	hsa04510
Phosphatidylinositol signaling system	53	1.2	8e-13	1.1e-09	hsa04070
Ubiquitin mediated proteolysis	65	1.5	3.6e-12	4.8e-09	hsa04120
Small cell lung cancer	45	1.1	1.4e-10	1.8e-07	hsa05222
Axon guidance	58	1.4	3.9e-10	5.2e-07	hsa04360
Inositol phosphate metabolism	37	0.9	1.4e-08	1.8e-05	hsa00562
Pathways in cancer	126	2.9	4.2e-08	5.6e-05	hsa05200
Thyroid hormone signaling pathway	50	1.2	5.3e-08	7e-05	hsa04919
Regulation of actin cytoskeleton	77	1.8	7.3e-08	9.7e-05	hsa04810
NOD-like receptor signaling pathway	30	0.7	2e-07	0.00026	hsa04621
ErbB signaling pathway	40	0.9	2.5e-07	0.00032	hsa04012
PI3K-Akt signaling pathway	111	2.6	2.5e-07	0.00033	hsa04151
Cell cycle	51	1.2	3.2e-07	0.00042	hsa04110
Herpes simplex infection	67	1.6	6.2e-07	0.00082	hsa05168
Fanconi anemia pathway	28	0.7	7.9e-07	0.001	hsa03460
Endocytosis	81	1.9	2e-06	0.0027	hsa04144
ECM-receptor interaction	38	0.9	2.4e-06	0.0032	hsa04512
Pancreatic cancer	31	0.7	2.9e-06	0.0038	hsa05212
Apoptosis	30	0.7	3e-06	0.0039	hsa04210
Complement and coagulation cascades	32	0.7	4e-06	0.0052	hsa04610
Insulin signaling pathway	52	1.2	5.2e-06	0.0069	hsa04910
TNF signaling pathway	43	1	6.2e-06	0.0082	hsa04668
NF-kappa B signaling pathway	37	0.9	7e-06	0.0093	hsa04064
Ras signaling pathway	75	1.8	8.5e-06	0.011	hsa04014
Proteoglycans in cancer	68	1.6	9.8e-06	0.013	hsa05205
Chronic myeloid leukemia	32	0.7	1.2e-05	0.015	hsa05220
Insulin resistance	42	1	2.1e-05	0.027	hsa04931
Adherens junction	31	0.7	2.5e-05	0.033	hsa04520
Endometrial cancer	25	0.6	2.8e-05	0.037	hsa05213
Colorectal cancer	28	0.7	3.3e-05	0.043	hsa05210
Toxoplasmosis	42	1	3.4e-05	0.045	hsa05145
Influenza A	59	1.4	4.5e-05	0.059
Hepatitis C	48	1.1	4.6e-05	0.061
Measles	48	1.1	4.6e-05	0.061
Prostate cancer	35	0.8	6.9e-05	0.09
HIF-1 signaling pathway	37	0.9	8.8e-05	0.12
Glioma	28	0.7	9e-05	0.12
Hepatitis B	50	1.2	0.00012	0.16
RNA transport	57	1.3	0.00012	0.16
Progesterone-mediated oocyte maturation	34	0.8	0.00013	0.18
FoxO signaling pathway	46	1.1	0.00026	0.34
Neurotrophin signaling pathway	42	1	0.00032	0.42
Inflammatory mediator regulation of TRP channels	36	0.8	0.00033	0.44
Acute myeloid leukemia	24	0.6	0.00036	0.47
Non-small cell lung cancer	24	0.6	0.00036	0.47
Glucagon signaling pathway	36	0.8	0.00041	0.55
Circadian rhythm	16	0.4	0.00048	0.63
B cell receptor signaling pathway	27	0.6	0.00075	0.98
Renal cell carcinoma	26	0.6	0.00086	1.1
Jak-STAT signaling pathway	47	1.1	0.00092	1.2
Epstein-Barr virus infection	41	1	0.00095	1.3
RIG-I-like receptor signaling pathway	27	0.6	0.00096	1.3
T cell receptor signaling pathway	35	0.8	0.0011	1.4
Choline metabolism in cancer	35	0.8	0.0013	1.8
Toll-like receptor signaling pathway	36	0.8	0.0017	2.2
Amoebiasis	36	0.8	0.0017	2.2
mTOR signaling pathway	23	0.5	0.0017	2.2
AMPK signaling pathway	40	0.9	0.0022	2.9
Chagas disease (American trypanosomiasis)	35	0.8	0.0023	3.1
Hypertrophic cardiomyopathy (HCM)	28	0.7	0.0026	3.4
Arrhythmogenic right ventricular cardiomyopathy (ARVC)	25	0.6	0.0026	3.4
Melanoma	26	0.6	0.0028	3.7
MAPK signaling pathway	71	1.7	0.0035	4.5
Platelet activation	41	1	0.0036	4.6
Fc gamma R-mediated phagocytosis	29	0.7	0.004	5.2
Purine metabolism	52	1.2	0.0044	5.7
Malaria	19	0.4	0.0064	8.1
Fc epsilon RI signaling pathway	24	0.6	0.0072	9
VEGF signaling pathway	22	0.5	0.0079	10
Non-homologous end-joining	8	0.2	0.0081	10
Starch and sucrose metabolism	14	0.3	0.01	13
Adipocytokine signaling pathway	24	0.6	0.01	13
Bacterial invasion of epithelial cells	26	0.6	0.011	14
Viral carcinogenesis	57	1.3	0.011	14
Type II diabetes mellitus	18	0.4	0.012	15
Rap1 signaling pathway	58	1.4	0.012	15
Prolactin signaling pathway	24	0.6	0.013	15
Lysine degradation	19	0.4	0.013	15
Morphine addiction	29	0.7	0.013	16
Central carbon metabolism in cancer	22	0.5	0.014	17
Regulation of autophagy	11	0.3	0.021	24
Osteoclast differentiation	38	0.9	0.021	24
Signaling pathways regulating pluripotency of stem cells	40	0.9	0.022	26
Oocyte meiosis	33	0.8	0.023	26
Epithelial cell signaling in Helicobacter pylori infection	22	0.5	0.024	28
Long-term depression	20	0.5	0.028	31
Dilated cardiomyopathy	26	0.6	0.028	31
cAMP signaling pathway	53	1.2	0.029	32
Calcium signaling pathway	48	1.1	0.037	39
Oxytocin signaling pathway	41	1	0.041	42
GnRH signaling pathway	27	0.6	0.041	43
Nucleotide excision repair	16	0.4	0.045	45
p53 signaling pathway	21	0.5	0.045	46
Tuberculosis	47	1.1	0.045	46
Base excision repair	12	0.3	0.06	56
Bladder cancer	14	0.3	0.062	57
Basal transcription factors	15	0.4	0.062	57
mRNA surveillance pathway	26	0.6	0.068	61
Ribosome biogenesis in eukaryotes	25	0.6	0.07	62
Gap junction	25	0.6	0.078	66
Mismatch repair	9	0.2	0.081	67
HTLV-I infection	62	1.5	0.095	73
Wnt signaling pathway	36	0.8	0.097	74

## Sheet: PE243_Hsapiens
101 chart records
Term	Count	%	P-Value	FDR	ID Kegg
Ubiquitin mediated proteolysis	72	1.5	3.5e-13	4.6e-10	hsa04510
Focal adhesion	96	2	3.8e-13	5e-10	hsa04510
Phosphatidylinositol signaling system	57	1.2	5.7e-13	7.6e-10	hsa04070
Small cell lung cancer	48	1	2e-10	2.7e-07	hsa05222
Axon guidance	61	1.2	2.8e-09	3.8e-06	hsa04360
Pathways in cancer	143	2.9	3.8e-09	5.1e-06	hsa05200
PI3K-Akt signaling pathway	127	2.6	1.5e-08	2e-05	hsa04151
Herpes simplex infection	77	1.6	3e-08	4e-05	hsa05168
Inositol phosphate metabolism	39	0.8	3.7e-08	4.8e-05	hsa00562
Regulation of actin cytoskeleton	85	1.7	4.4e-08	5.9e-05	hsa04810
ErbB signaling pathway	44	0.9	1e-07	0.00013	hsa04012
Thyroid hormone signaling pathway	52	1.1	5.3e-07	0.00071	hsa04919
Endocytosis	90	1.8	1.2e-06	0.0016	hsa04144
Fanconi anemia pathway	29	0.6	3.2e-06	0.0043	hsa03460
Insulin signaling pathway	57	1.2	4.7e-06	0.0063	hsa04910
Ras signaling pathway	83	1.7	7e-06	0.0093	hsa04014
Chronic myeloid leukemia	35	0.7	7.9e-06	0.01	hsa05220
Cell cycle	52	1.1	7.9e-06	0.011	hsa04110
NF-kappa B signaling pathway	40	0.8	8.4e-06	0.011	hsa04064
Proteoglycans in cancer	75	1.5	8.9e-06	0.012	hsa05205
Jak-STAT signaling pathway	58	1.2	1.2e-05	0.016	hsa04630
NOD-like receptor signaling pathway	29	0.6	1.3e-05	0.017	hsa04621
Apoptosis	31	0.6	1.5e-05	0.02	hsa04210
Influenza A	66	1.3	2.2e-05	0.029	hsa05164
ECM-receptor interaction	39	0.8	2.3e-05	0.03	hsa04512
Complement and coagulation cascades	33	0.7	2.3e-05	0.031	hsa04610
Endometrial cancer	27	0.5	2.6e-05	0.035	hsa05213
RIG-I-like receptor signaling pathway	33	0.7	3.3e-05	0.044	hsa04622
Hepatitis C	53	1.1	3.5e-05	0.046	hsa05160
Measles	53	1.1	3.5e-05	0.046	hsa05162
Non-small cell lung cancer	28	0.6	4.2e-05	0.056
Insulin resistance	45	0.9	4.3e-05	0.057
Pancreatic cancer	31	0.6	4.6e-05	0.061
Adherens junction	33	0.7	4.7e-05	0.062
Hepatitis B	56	1.1	5.7e-05	0.075
T cell receptor signaling pathway	42	0.9	6.6e-05	0.087
Prostate cancer	38	0.8	7.9e-05	0.1
Acute myeloid leukemia	27	0.5	0.00013	0.17
Glioma	30	0.6	0.00013	0.17
Colorectal cancer	29	0.6	0.00013	0.17
Toxoplasmosis	44	0.9	0.00016	0.22
TNF signaling pathway	43	0.9	0.00017	0.23
B cell receptor signaling pathway	31	0.6	0.00018	0.24
HIF-1 signaling pathway	39	0.8	0.00029	0.38
Renal cell carcinoma	29	0.6	0.00048	0.63
Toll-like receptor signaling pathway	41	0.8	0.00064	0.84
mTOR signaling pathway	26	0.5	0.00071	0.94
Neurotrophin signaling pathway	45	0.9	0.00071	0.94
RNA transport	60	1.2	0.00073	0.96
Progesterone-mediated oocyte maturation	35	0.7	0.00077	1
Inflammatory mediator regulation of TRP channels	38	0.8	0.00099	1.3
FoxO signaling pathway	48	1	0.0014	1.9
MAPK signaling pathway	81	1.6	0.0015	2
Choline metabolism in cancer	38	0.8	0.0019	2.4
Fc epsilon RI signaling pathway	28	0.6	0.002	2.6
Circadian rhythm	16	0.3	0.0021	2.7
Platelet activation	46	0.9	0.0024	3.2
Glucagon signaling pathway	37	0.8	0.0025	3.2
Melanoma	28	0.6	0.0041	5.2
Bacterial invasion of epithelial cells	30	0.6	0.0043	5.6
AMPK signaling pathway	43	0.9	0.0044	5.7
Amoebiasis	38	0.8	0.0048	6.2
Chagas disease (American trypanosomiasis)	37	0.8	0.0063	8
Purine metabolism	57	1.2	0.0064	8.2
Epstein-Barr virus infection	42	0.9	0.0066	8.4
Rap1 signaling pathway	66	1.3	0.007	8.9
Arrhythmogenic right ventricular cardiomyopathy (ARVC)	26	0.5	0.0074	9.3
VEGF signaling pathway	24	0.5	0.0086	11
Hypertrophic cardiomyopathy (HCM)	29	0.6	0.0087	11
Osteoclast differentiation	44	0.9	0.0088	11
Oocyte meiosis	38	0.8	0.011	14
Tuberculosis	56	1.1	0.011	14
Adipocytokine signaling pathway	26	0.5	0.014	17
GnRH signaling pathway	32	0.7	0.014	17
Fc gamma R-mediated phagocytosis	30	0.6	0.014	17
p53 signaling pathway	25	0.5	0.015	18
Prolactin signaling pathway	26	0.5	0.016	20
Non-homologous end-joining	8	0.2	0.017	20
Regulation of autophagy	12	0.2	0.019	22
Long-term potentiation	24	0.5	0.024	27
Morphine addiction	31	0.6	0.024	28
Malaria	19	0.4	0.025	28
Long-term depression	22	0.4	0.028	32
Starch and sucrose metabolism	14	0.3	0.03	33
Central carbon metabolism in cancer	23	0.5	0.031	34
Oxytocin signaling pathway	46	0.9	0.038	40
Type II diabetes mellitus	18	0.4	0.041	43
Dilated cardiomyopathy	28	0.6	0.043	44
Viral carcinogenesis	60	1.2	0.043	44
Gap junction	29	0.6	0.045	45
Lysine degradation	19	0.4	0.045	46
cAMP signaling pathway	58	1.2	0.046	46
Natural killer cell mediated cytotoxicity	38	0.8	0.048	48
Epithelial cell signaling in Helicobacter pylori infection	23	0.5	0.051	50
Signaling pathways regulating pluripotency of stem cells	42	0.9	0.064	58
Base excision repair	13	0.3	0.066	59
mRNA surveillance pathway	29	0.6	0.066	59
Leukocyte transendothelial migration	35	0.7	0.077	65
Dorso-ventral axis formation	11	0.2	0.079	67
Bladder cancer	15	0.3	0.08	67
Cytosolic DNA-sensing pathway	21	0.4	0.095	73
