# Supplementary material for: In silico predictions of protein interactions between Zika virus and human host
Source: PeerJ. 2021 Aug 24;9:e11770. doi: 10.7717/peerj.11770 (PMC8395582; doi:10.7717/peerj.11770)
Supplement: Supplemental Information 11 [file peerj-09-11770-s011.xlsx]

## Sheet: Table S2
ZIKV Protein ID	Strain	Gene Symbol	H. sapiens Proteins ID	Predictions
				SVM	RF Class	RF Prob
VIPR_ALG4_1008913396_108_419	FSS13025	C	A0A0G2JP20	1	1	0.468
VIPR_ALG4_1008913396_108_419	FSS13025	C	A0A0G2JPQ2	1	1	0.482
VIPR_ALG4_1008913396_108_419	FSS13025	C	A0A140TA62	1	1	0.456
VIPR_ALG4_1008913396_108_419	FSS13025	C	A0A1B0GVI7	1	1	0.494
VIPR_ALG4_1008913396_108_419	FSS13025	C	A0A2R8Y872	1	1	0.482
VIPR_ALG4_1008913396_108_419	FSS13025	C	A0AVK6	1	1	0.496
VIPR_ALG4_1008913396_108_419	FSS13025	C	A0JNW5	1	1	0.494
VIPR_ALG4_1008913396_108_419	FSS13025	C	A1KZ92	1	1	0.496
VIPR_ALG4_1008913396_108_419	FSS13025	C	A2PYH4	1	1	0.494
VIPR_ALG4_1008913396_108_419	FSS13025	C	A2RRP1	1	1	0.452
VIPR_ALG4_1008913396_108_419	FSS13025	C	A2VDJ0	1	1	0.494
VIPR_ALG4_1008913396_108_419	FSS13025	C	A3QJZ7	1	1	0.468
VIPR_ALG4_1008913396_108_419	FSS13025	C	A4D0S4	1	1	0.462
VIPR_ALG4_1008913396_108_419	FSS13025	C	A4D1E1	1	1	0.474
VIPR_ALG4_1008913396_108_419	FSS13025	C	A4QPH2	1	1	0.488
VIPR_ALG4_1008913396_108_419	FSS13025	C	A6H8Z2	1	1	0.498
VIPR_ALG4_1008913396_108_419	FSS13025	C	A6NHC0	1	1	0.466
VIPR_ALG4_1008913396_108_419	FSS13025	C	A6NIR3	1	1	0.486
VIPR_ALG4_1008913396_108_419	FSS13025	C	A6NK02	1	1	0.49
VIPR_ALG4_1008913396_108_419	FSS13025	C	A8MVM7	1	1	0.498
VIPR_ALG4_1008913396_108_419	FSS13025	C	B3KU38	1	1	0.496
VIPR_ALG4_1008913396_108_419	FSS13025	C	C9JQI7	1	1	0.49
VIPR_ALG4_1008913396_108_419	FSS13025	C	G9CGD6	1	1	0.492
VIPR_ALG4_1008913396_108_419	FSS13025	C	O00237	1	1	0.488
VIPR_ALG4_1008913396_108_419	FSS13025	C	O00300	1	1	0.48
VIPR_ALG4_1008913396_108_419	FSS13025	C	O00408	1	1	0.478
VIPR_ALG4_1008913396_108_419	FSS13025	C	O00410	1	1	0.456
VIPR_ALG4_1008913396_108_419	FSS13025	C	O00443	1	1	0.494
VIPR_ALG4_1008913396_108_419	FSS13025	C	O00463	1	1	0.49
VIPR_ALG4_1008913396_108_419	FSS13025	C	O00471	1	1	0.486
VIPR_ALG4_1008913396_108_419	FSS13025	C	O00507	1	1	0.46
VIPR_ALG4_1008913396_108_419	FSS13025	C	O14525	1	1	0.49
VIPR_ALG4_1008913396_108_419	FSS13025	C	O14545	1	1	0.48
VIPR_ALG4_1008913396_108_419	FSS13025	C	O14594	1	1	0.488
VIPR_ALG4_1008913396_108_419	FSS13025	C	O14607	1	1	0.468
VIPR_ALG4_1008913396_108_419	FSS13025	C	O14638	1	1	0.48
VIPR_ALG4_1008913396_108_419	FSS13025	C	O14727	1	1	0.434
VIPR_ALG4_1008913396_108_419	FSS13025	C	O14827	1	1	0.494
VIPR_ALG4_1008913396_108_419	FSS13025	C	O14920	1	1	0.418
VIPR_ALG4_1008913396_108_419	FSS13025	C	O15015	1	1	0.484
VIPR_ALG4_1008913396_108_419	FSS13025	C	O15033	1	1	0.474
VIPR_ALG4_1008913396_108_419	FSS13025	C	O15040	1	1	0.484
VIPR_ALG4_1008913396_108_419	FSS13025	C	O15072	1	1	0.45
VIPR_ALG4_1008913396_108_419	FSS13025	C	O15111	1	1	0.48
VIPR_ALG4_1008913396_108_419	FSS13025	C	O15164	1	1	0.462
VIPR_ALG4_1008913396_108_419	FSS13025	C	O15259	1	1	0.496
VIPR_ALG4_1008913396_108_419	FSS13025	C	O15344	1	1	0.49
VIPR_ALG4_1008913396_108_419	FSS13025	C	O43149	1	1	0.494
VIPR_ALG4_1008913396_108_419	FSS13025	C	O43167	1	1	0.48
VIPR_ALG4_1008913396_108_419	FSS13025	C	O43283	1	1	0.482
VIPR_ALG4_1008913396_108_419	FSS13025	C	O43318	1	1	0.482
VIPR_ALG4_1008913396_108_419	FSS13025	C	O43379	1	1	0.488
VIPR_ALG4_1008913396_108_419	FSS13025	C	O43566	1	1	0.484
VIPR_ALG4_1008913396_108_419	FSS13025	C	O43683	1	1	0.494
VIPR_ALG4_1008913396_108_419	FSS13025	C	O43847	1	1	0.488
VIPR_ALG4_1008913396_108_419	FSS13025	C	O60315	1	1	0.452
VIPR_ALG4_1008913396_108_419	FSS13025	C	O60449	1	1	0.464
VIPR_ALG4_1008913396_108_419	FSS13025	C	O60462	1	1	0.48
VIPR_ALG4_1008913396_108_419	FSS13025	C	O60477	1	1	0.486
VIPR_ALG4_1008913396_108_419	FSS13025	C	O60486	1	1	0.456
VIPR_ALG4_1008913396_108_419	FSS13025	C	O60494	1	1	0.49
VIPR_ALG4_1008913396_108_419	FSS13025	C	O60518	1	1	0.46
VIPR_ALG4_1008913396_108_419	FSS13025	C	O60603	1	1	0.48
VIPR_ALG4_1008913396_108_419	FSS13025	C	O60673	1	1	0.49
VIPR_ALG4_1008913396_108_419	FSS13025	C	O60674	1	1	0.486
VIPR_ALG4_1008913396_108_419	FSS13025	C	O60934	1	1	0.494
VIPR_ALG4_1008913396_108_419	FSS13025	C	O75051	1	1	0.466
VIPR_ALG4_1008913396_108_419	FSS13025	C	O75140	1	1	0.496
VIPR_ALG4_1008913396_108_419	FSS13025	C	O75159	1	1	0.48
VIPR_ALG4_1008913396_108_419	FSS13025	C	O75443	1	1	0.444
VIPR_ALG4_1008913396_108_419	FSS13025	C	O75445	1	1	0.494
VIPR_ALG4_1008913396_108_419	FSS13025	C	O75460	1	1	0.494
VIPR_ALG4_1008913396_108_419	FSS13025	C	O75592	1	1	0.478
VIPR_ALG4_1008913396_108_419	FSS13025	C	O75674	1	1	0.492
VIPR_ALG4_1008913396_108_419	FSS13025	C	O75962	1	1	0.496
VIPR_ALG4_1008913396_108_419	FSS13025	C	O76009	1	1	0.474
VIPR_ALG4_1008913396_108_419	FSS13025	C	O76011	1	1	0.454
VIPR_ALG4_1008913396_108_419	FSS13025	C	O94813	1	1	0.486
VIPR_ALG4_1008913396_108_419	FSS13025	C	O94822	1	1	0.496
VIPR_ALG4_1008913396_108_419	FSS13025	C	O94851	1	1	0.452
VIPR_ALG4_1008913396_108_419	FSS13025	C	O94880	1	1	0.47
VIPR_ALG4_1008913396_108_419	FSS13025	C	O94967	1	1	0.472
VIPR_ALG4_1008913396_108_419	FSS13025	C	O94972	1	1	0.452
VIPR_ALG4_1008913396_108_419	FSS13025	C	O94985	1	1	0.476
VIPR_ALG4_1008913396_108_419	FSS13025	C	O95071	1	1	0.496
VIPR_ALG4_1008913396_108_419	FSS13025	C	O95163	1	1	0.496
VIPR_ALG4_1008913396_108_419	FSS13025	C	O95199	1	1	0.472
VIPR_ALG4_1008913396_108_419	FSS13025	C	O95361	1	1	0.476
VIPR_ALG4_1008913396_108_419	FSS13025	C	O95373	1	1	0.484
VIPR_ALG4_1008913396_108_419	FSS13025	C	O95405	1	1	0.448
VIPR_ALG4_1008913396_108_419	FSS13025	C	O95786	1	1	0.498
VIPR_ALG4_1008913396_108_419	FSS13025	C	O95789	1	1	0.458
VIPR_ALG4_1008913396_108_419	FSS13025	C	O95980	1	1	0.486
VIPR_ALG4_1008913396_108_419	FSS13025	C	O95985	1	1	0.496
VIPR_ALG4_1008913396_108_419	FSS13025	C	P00973	1	1	0.494
VIPR_ALG4_1008913396_108_419	FSS13025	C	P01106	1	1	0.474
VIPR_ALG4_1008913396_108_419	FSS13025	C	P01266	1	1	0.49
VIPR_ALG4_1008913396_108_419	FSS13025	C	P02760	1	1	0.462
VIPR_ALG4_1008913396_108_419	FSS13025	C	P03952	1	1	0.498
VIPR_ALG4_1008913396_108_419	FSS13025	C	P04049	1	1	0.474
VIPR_ALG4_1008913396_108_419	FSS13025	C	P04275	1	1	0.434
VIPR_ALG4_1008913396_108_419	FSS13025	C	P05156	1	1	0.484
VIPR_ALG4_1008913396_108_419	FSS13025	C	P05556	1	1	0.472
VIPR_ALG4_1008913396_108_419	FSS13025	C	P06400	1	1	0.49
VIPR_ALG4_1008913396_108_419	FSS13025	C	P06748	1	1	0.474
VIPR_ALG4_1008913396_108_419	FSS13025	C	P07225	1	1	0.484
VIPR_ALG4_1008913396_108_419	FSS13025	C	P07942	1	1	0.45
VIPR_ALG4_1008913396_108_419	FSS13025	C	P08048	1	1	0.446
VIPR_ALG4_1008913396_108_419	FSS13025	C	P08575	1	1	0.466
VIPR_ALG4_1008913396_108_419	FSS13025	C	P08603	1	1	0.432
VIPR_ALG4_1008913396_108_419	FSS13025	C	P08709	1	1	0.486
VIPR_ALG4_1008913396_108_419	FSS13025	C	P09884	1	1	0.462
VIPR_ALG4_1008913396_108_419	FSS13025	C	P10071	1	1	0.496
VIPR_ALG4_1008913396_108_419	FSS13025	C	P10398	1	1	0.48
VIPR_ALG4_1008913396_108_419	FSS13025	C	P11717	1	1	0.476
VIPR_ALG4_1008913396_108_419	FSS13025	C	P13497	1	1	0.49
VIPR_ALG4_1008913396_108_419	FSS13025	C	P13671	1	1	0.472
VIPR_ALG4_1008913396_108_419	FSS13025	C	P13861	1	1	0.496
VIPR_ALG4_1008913396_108_419	FSS13025	C	P14373	1	1	0.496
VIPR_ALG4_1008913396_108_419	FSS13025	C	P15498	1	1	0.474
VIPR_ALG4_1008913396_108_419	FSS13025	C	P16499	1	1	0.496
VIPR_ALG4_1008913396_108_419	FSS13025	C	P17010	1	1	0.47
VIPR_ALG4_1008913396_108_419	FSS13025	C	P17301	1	1	0.488
VIPR_ALG4_1008913396_108_419	FSS13025	C	P18084	1	1	0.47
VIPR_ALG4_1008913396_108_419	FSS13025	C	P19823	1	1	0.496
VIPR_ALG4_1008913396_108_419	FSS13025	C	P21359	1	1	0.498
VIPR_ALG4_1008913396_108_419	FSS13025	C	P21860	1	1	0.494
VIPR_ALG4_1008913396_108_419	FSS13025	C	P22681	1	1	0.492
VIPR_ALG4_1008913396_108_419	FSS13025	C	P23258	1	1	0.47
VIPR_ALG4_1008913396_108_419	FSS13025	C	P23458	1	1	0.494
VIPR_ALG4_1008913396_108_419	FSS13025	C	P24043	1	1	0.446
VIPR_ALG4_1008913396_108_419	FSS13025	C	P24278	1	1	0.484
VIPR_ALG4_1008913396_108_419	FSS13025	C	P24385	1	1	0.488
VIPR_ALG4_1008913396_108_419	FSS13025	C	P25391	1	1	0.476
VIPR_ALG4_1008913396_108_419	FSS13025	C	P29320	1	1	0.486
VIPR_ALG4_1008913396_108_419	FSS13025	C	P30281	1	1	0.488
VIPR_ALG4_1008913396_108_419	FSS13025	C	P35398	1	1	0.476
VIPR_ALG4_1008913396_108_419	FSS13025	C	P35443	1	1	0.476
VIPR_ALG4_1008913396_108_419	FSS13025	C	P35555	1	1	0.42
VIPR_ALG4_1008913396_108_419	FSS13025	C	P35556	1	1	0.468
VIPR_ALG4_1008913396_108_419	FSS13025	C	P35869	1	1	0.482
VIPR_ALG4_1008913396_108_419	FSS13025	C	P36888	1	1	0.498
VIPR_ALG4_1008913396_108_419	FSS13025	C	P38398	1	1	0.464
VIPR_ALG4_1008913396_108_419	FSS13025	C	P40189	1	1	0.424
VIPR_ALG4_1008913396_108_419	FSS13025	C	P41182	1	1	0.49
VIPR_ALG4_1008913396_108_419	FSS13025	C	P41212	1	1	0.492
VIPR_ALG4_1008913396_108_419	FSS13025	C	P41743	1	1	0.48
VIPR_ALG4_1008913396_108_419	FSS13025	C	P42702	1	1	0.494
VIPR_ALG4_1008913396_108_419	FSS13025	C	P43354	1	1	0.492
VIPR_ALG4_1008913396_108_419	FSS13025	C	P46934	1	1	0.448
VIPR_ALG4_1008913396_108_419	FSS13025	C	P47989	1	1	0.46
VIPR_ALG4_1008913396_108_419	FSS13025	C	P48553	1	1	0.49
VIPR_ALG4_1008913396_108_419	FSS13025	C	P48740	1	1	0.48
VIPR_ALG4_1008913396_108_419	FSS13025	C	P49023	1	1	0.478
VIPR_ALG4_1008913396_108_419	FSS13025	C	P49767	1	1	0.494
VIPR_ALG4_1008913396_108_419	FSS13025	C	P49792	1	1	0.486
VIPR_ALG4_1008913396_108_419	FSS13025	C	P51784	1	1	0.478
VIPR_ALG4_1008913396_108_419	FSS13025	C	P51841	1	1	0.492
VIPR_ALG4_1008913396_108_419	FSS13025	C	P52294	1	1	0.44
VIPR_ALG4_1008913396_108_419	FSS13025	C	P52735	1	1	0.488
VIPR_ALG4_1008913396_108_419	FSS13025	C	P52746	1	1	0.486
VIPR_ALG4_1008913396_108_419	FSS13025	C	P54098	1	1	0.488
VIPR_ALG4_1008913396_108_419	FSS13025	C	P54132	1	1	0.496
VIPR_ALG4_1008913396_108_419	FSS13025	C	P54198	1	1	0.492
VIPR_ALG4_1008913396_108_419	FSS13025	C	P54756	1	1	0.48
VIPR_ALG4_1008913396_108_419	FSS13025	C	P54762	1	1	0.494
VIPR_ALG4_1008913396_108_419	FSS13025	C	P56199	1	1	0.44
VIPR_ALG4_1008913396_108_419	FSS13025	C	P58397	1	1	0.488
VIPR_ALG4_1008913396_108_419	FSS13025	C	P59046	1	1	0.498
VIPR_ALG4_1008913396_108_419	FSS13025	C	P59510	1	1	0.436
VIPR_ALG4_1008913396_108_419	FSS13025	C	P68400	1	1	0.462
VIPR_ALG4_1008913396_108_419	FSS13025	C	P78509	1	1	0.45
VIPR_ALG4_1008913396_108_419	FSS13025	C	P78527	1	1	0.476
VIPR_ALG4_1008913396_108_419	FSS13025	C	P78536	1	1	0.478
VIPR_ALG4_1008913396_108_419	FSS13025	C	P78562	1	1	0.492
VIPR_ALG4_1008913396_108_419	FSS13025	C	P82279	1	1	0.47
VIPR_ALG4_1008913396_108_419	FSS13025	C	P82987	1	1	0.444
VIPR_ALG4_1008913396_108_419	FSS13025	C	P86452	1	1	0.47
VIPR_ALG4_1008913396_108_419	FSS13025	C	P98073	1	1	0.476
VIPR_ALG4_1008913396_108_419	FSS13025	C	P98155	1	1	0.456
VIPR_ALG4_1008913396_108_419	FSS13025	C	P98164	1	1	0.422
VIPR_ALG4_1008913396_108_419	FSS13025	C	P98170	1	1	0.466
VIPR_ALG4_1008913396_108_419	FSS13025	C	Q00534	1	1	0.494
VIPR_ALG4_1008913396_108_419	FSS13025	C	Q00610	1	1	0.474
VIPR_ALG4_1008913396_108_419	FSS13025	C	Q02509	1	1	0.48
VIPR_ALG4_1008913396_108_419	FSS13025	C	Q03591	1	1	0.498
VIPR_ALG4_1008913396_108_419	FSS13025	C	Q03933	1	1	0.496
VIPR_ALG4_1008913396_108_419	FSS13025	C	Q04721	1	1	0.456
VIPR_ALG4_1008913396_108_419	FSS13025	C	Q04725	1	1	0.478
VIPR_ALG4_1008913396_108_419	FSS13025	C	Q04726	1	1	0.472
VIPR_ALG4_1008913396_108_419	FSS13025	C	Q04759	1	1	0.494
VIPR_ALG4_1008913396_108_419	FSS13025	C	Q05086	1	1	0.416
VIPR_ALG4_1008913396_108_419	FSS13025	C	Q06190	1	1	0.462
VIPR_ALG4_1008913396_108_419	FSS13025	C	Q07075	1	1	0.492
VIPR_ALG4_1008913396_108_419	FSS13025	C	Q08493	1	1	0.49
VIPR_ALG4_1008913396_108_419	FSS13025	C	Q08554	1	1	0.482
VIPR_ALG4_1008913396_108_419	FSS13025	C	Q09161	1	1	0.484
VIPR_ALG4_1008913396_108_419	FSS13025	C	Q09472	1	1	0.448
VIPR_ALG4_1008913396_108_419	FSS13025	C	Q12824	1	1	0.432
VIPR_ALG4_1008913396_108_419	FSS13025	C	Q12841	1	1	0.47
VIPR_ALG4_1008913396_108_419	FSS13025	C	Q12874	1	1	0.462
VIPR_ALG4_1008913396_108_419	FSS13025	C	Q12888	1	1	0.486
VIPR_ALG4_1008913396_108_419	FSS13025	C	Q12933	1	1	0.44
VIPR_ALG4_1008913396_108_419	FSS13025	C	Q12986	1	1	0.47
VIPR_ALG4_1008913396_108_419	FSS13025	C	Q13018	1	1	0.462
VIPR_ALG4_1008913396_108_419	FSS13025	C	Q13043	1	1	0.494
VIPR_ALG4_1008913396_108_419	FSS13025	C	Q13045	1	1	0.484
VIPR_ALG4_1008913396_108_419	FSS13025	C	Q13107	1	1	0.482
VIPR_ALG4_1008913396_108_419	FSS13025	C	Q13129	1	1	0.494
VIPR_ALG4_1008913396_108_419	FSS13025	C	Q13131	1	1	0.498
VIPR_ALG4_1008913396_108_419	FSS13025	C	Q13137	1	1	0.496
VIPR_ALG4_1008913396_108_419	FSS13025	C	Q13219	1	1	0.442
VIPR_ALG4_1008913396_108_419	FSS13025	C	Q13402	1	1	0.486
VIPR_ALG4_1008913396_108_419	FSS13025	C	Q13489	1	1	0.478
VIPR_ALG4_1008913396_108_419	FSS13025	C	Q13555	1	1	0.494
VIPR_ALG4_1008913396_108_419	FSS13025	C	Q13615	1	1	0.464
VIPR_ALG4_1008913396_108_419	FSS13025	C	Q13617	1	1	0.498
VIPR_ALG4_1008913396_108_419	FSS13025	C	Q13625	1	1	0.494
VIPR_ALG4_1008913396_108_419	FSS13025	C	Q13651	1	1	0.486
VIPR_ALG4_1008913396_108_419	FSS13025	C	Q13751	1	1	0.47
VIPR_ALG4_1008913396_108_419	FSS13025	C	Q13769	1	1	0.494
VIPR_ALG4_1008913396_108_419	FSS13025	C	Q13772	1	1	0.446
VIPR_ALG4_1008913396_108_419	FSS13025	C	Q13972	1	1	0.476
VIPR_ALG4_1008913396_108_419	FSS13025	C	Q14114	1	1	0.468
VIPR_ALG4_1008913396_108_419	FSS13025	C	Q14181	1	1	0.494
VIPR_ALG4_1008913396_108_419	FSS13025	C	Q14191	1	1	0.492
VIPR_ALG4_1008913396_108_419	FSS13025	C	Q14457	1	1	0.462
VIPR_ALG4_1008913396_108_419	FSS13025	C	Q14525	1	1	0.454
VIPR_ALG4_1008913396_108_419	FSS13025	C	Q14596	1	1	0.49
VIPR_ALG4_1008913396_108_419	FSS13025	C	Q14643	1	1	0.494
VIPR_ALG4_1008913396_108_419	FSS13025	C	Q14644	1	1	0.482
VIPR_ALG4_1008913396_108_419	FSS13025	C	Q14653	1	1	0.49
VIPR_ALG4_1008913396_108_419	FSS13025	C	Q14680	1	1	0.452
VIPR_ALG4_1008913396_108_419	FSS13025	C	Q14767	1	1	0.454
VIPR_ALG4_1008913396_108_419	FSS13025	C	Q14790	1	1	0.488
VIPR_ALG4_1008913396_108_419	FSS13025	C	Q14831	1	1	0.49
VIPR_ALG4_1008913396_108_419	FSS13025	C	Q149N8	1	1	0.482
VIPR_ALG4_1008913396_108_419	FSS13025	C	Q15029	1	1	0.496
VIPR_ALG4_1008913396_108_419	FSS13025	C	Q15303	1	1	0.484
VIPR_ALG4_1008913396_108_419	FSS13025	C	Q15323	1	1	0.458
VIPR_ALG4_1008913396_108_419	FSS13025	C	Q15326	1	1	0.464
VIPR_ALG4_1008913396_108_419	FSS13025	C	Q15468	1	1	0.486
VIPR_ALG4_1008913396_108_419	FSS13025	C	Q15652	1	1	0.476
VIPR_ALG4_1008913396_108_419	FSS13025	C	Q15751	1	1	0.47
VIPR_ALG4_1008913396_108_419	FSS13025	C	Q15788	1	1	0.488
VIPR_ALG4_1008913396_108_419	FSS13025	C	Q15911	1	1	0.462
VIPR_ALG4_1008913396_108_419	FSS13025	C	Q16342	1	1	0.488
VIPR_ALG4_1008913396_108_419	FSS13025	C	Q16363	1	1	0.492
VIPR_ALG4_1008913396_108_419	FSS13025	C	Q16531	1	1	0.428
VIPR_ALG4_1008913396_108_419	FSS13025	C	Q16760	1	1	0.482
VIPR_ALG4_1008913396_108_419	FSS13025	C	Q16787	1	1	0.462
VIPR_ALG4_1008913396_108_419	FSS13025	C	Q2M1K9	1	1	0.482
VIPR_ALG4_1008913396_108_419	FSS13025	C	Q2NKQ1	1	1	0.48
VIPR_ALG4_1008913396_108_419	FSS13025	C	Q3ZCN5	1	1	0.456
VIPR_ALG4_1008913396_108_419	FSS13025	C	Q49AG3	1	1	0.452
VIPR_ALG4_1008913396_108_419	FSS13025	C	Q49AJ0	1	1	0.488
VIPR_ALG4_1008913396_108_419	FSS13025	C	Q49AR2	1	1	0.48
VIPR_ALG4_1008913396_108_419	FSS13025	C	Q4FZB7	1	1	0.486
VIPR_ALG4_1008913396_108_419	FSS13025	C	Q4G0A6	1	1	0.494
VIPR_ALG4_1008913396_108_419	FSS13025	C	Q4KWH8	1	1	0.44
VIPR_ALG4_1008913396_108_419	FSS13025	C	Q4LDE5	1	1	0.442
VIPR_ALG4_1008913396_108_419	FSS13025	C	Q52LR7	1	1	0.496
VIPR_ALG4_1008913396_108_419	FSS13025	C	Q53H47	1	1	0.492
VIPR_ALG4_1008913396_108_419	FSS13025	C	Q53TQ3	1	1	0.466
VIPR_ALG4_1008913396_108_419	FSS13025	C	Q56UN5	1	1	0.498
VIPR_ALG4_1008913396_108_419	FSS13025	C	Q587J7	1	1	0.482
VIPR_ALG4_1008913396_108_419	FSS13025	C	Q5H9J9	1	1	0.496
VIPR_ALG4_1008913396_108_419	FSS13025	C	Q5H9S7	1	1	0.496
VIPR_ALG4_1008913396_108_419	FSS13025	C	Q5HYM0	1	1	0.498
VIPR_ALG4_1008913396_108_419	FSS13025	C	Q5K651	1	1	0.48
VIPR_ALG4_1008913396_108_419	FSS13025	C	Q5QJ74	1	1	0.496
VIPR_ALG4_1008913396_108_419	FSS13025	C	Q5S007	1	1	0.488
VIPR_ALG4_1008913396_108_419	FSS13025	C	Q5SVZ6	1	1	0.444
VIPR_ALG4_1008913396_108_419	FSS13025	C	Q5T1H1	1	1	0.414
VIPR_ALG4_1008913396_108_419	FSS13025	C	Q5T1N1	1	1	0.498
VIPR_ALG4_1008913396_108_419	FSS13025	C	Q5T2Q4	1	1	0.47
VIPR_ALG4_1008913396_108_419	FSS13025	C	Q5T4S7	1	1	0.49
VIPR_ALG4_1008913396_108_419	FSS13025	C	Q5T6S3	1	1	0.494
VIPR_ALG4_1008913396_108_419	FSS13025	C	Q5T7B8	1	1	0.466
VIPR_ALG4_1008913396_108_419	FSS13025	C	Q5TAQ9	1	1	0.49
VIPR_ALG4_1008913396_108_419	FSS13025	C	Q5TB30	1	1	0.492
VIPR_ALG4_1008913396_108_419	FSS13025	C	Q5TH69	1	1	0.494
VIPR_ALG4_1008913396_108_419	FSS13025	C	Q5THK1	1	1	0.482
VIPR_ALG4_1008913396_108_419	FSS13025	C	Q5TYX0	1	1	0.47
VIPR_ALG4_1008913396_108_419	FSS13025	C	Q5U5Z8	1	1	0.498
VIPR_ALG4_1008913396_108_419	FSS13025	C	Q5VT25	1	1	0.492
VIPR_ALG4_1008913396_108_419	FSS13025	C	Q5VT97	1	1	0.488
VIPR_ALG4_1008913396_108_419	FSS13025	C	Q5VU97	1	1	0.466
VIPR_ALG4_1008913396_108_419	FSS13025	C	Q5VUG0	1	1	0.47
VIPR_ALG4_1008913396_108_419	FSS13025	C	Q5VUJ5	1	1	0.496
VIPR_ALG4_1008913396_108_419	FSS13025	C	Q5VWM5	1	1	0.484
VIPR_ALG4_1008913396_108_419	FSS13025	C	Q5VXH4	1	1	0.476
VIPR_ALG4_1008913396_108_419	FSS13025	C	Q5VXU9	1	1	0.488
VIPR_ALG4_1008913396_108_419	FSS13025	C	Q5VYJ5	1	1	0.472
VIPR_ALG4_1008913396_108_419	FSS13025	C	Q5W0Q7	1	1	0.49
VIPR_ALG4_1008913396_108_419	FSS13025	C	Q68CZ6	1	1	0.496
VIPR_ALG4_1008913396_108_419	FSS13025	C	Q68D51	1	1	0.498
VIPR_ALG4_1008913396_108_419	FSS13025	C	Q68DK2	1	1	0.476
VIPR_ALG4_1008913396_108_419	FSS13025	C	Q68DQ2	1	1	0.498
VIPR_ALG4_1008913396_108_419	FSS13025	C	Q6AI39	1	1	0.496
VIPR_ALG4_1008913396_108_419	FSS13025	C	Q6DHV5	1	1	0.466
VIPR_ALG4_1008913396_108_419	FSS13025	C	Q6IE37	1	1	0.488
VIPR_ALG4_1008913396_108_419	FSS13025	C	Q6IE81	1	1	0.484
VIPR_ALG4_1008913396_108_419	FSS13025	C	Q6N021	1	1	0.448
VIPR_ALG4_1008913396_108_419	FSS13025	C	Q6N022	1	1	0.478
VIPR_ALG4_1008913396_108_419	FSS13025	C	Q6NSI8	1	1	0.464
VIPR_ALG4_1008913396_108_419	FSS13025	C	Q6PIU1	1	1	0.498
VIPR_ALG4_1008913396_108_419	FSS13025	C	Q6PJI9	1	1	0.452
VIPR_ALG4_1008913396_108_419	FSS13025	C	Q6PJW8	1	1	0.494
VIPR_ALG4_1008913396_108_419	FSS13025	C	Q6Q0C0	1	1	0.484
VIPR_ALG4_1008913396_108_419	FSS13025	C	Q6R2W3	1	1	0.486
VIPR_ALG4_1008913396_108_419	FSS13025	C	Q6R327	1	1	0.482
VIPR_ALG4_1008913396_108_419	FSS13025	C	Q6RI45	1	1	0.498
VIPR_ALG4_1008913396_108_419	FSS13025	C	Q6UXG2	1	1	0.474
VIPR_ALG4_1008913396_108_419	FSS13025	C	Q6UXK5	1	1	0.492
VIPR_ALG4_1008913396_108_419	FSS13025	C	Q6UXM1	1	1	0.456
VIPR_ALG4_1008913396_108_419	FSS13025	C	Q6UXV0	1	1	0.492
VIPR_ALG4_1008913396_108_419	FSS13025	C	Q6UY14	1	1	0.496
VIPR_ALG4_1008913396_108_419	FSS13025	C	Q6VMQ6	1	1	0.48
VIPR_ALG4_1008913396_108_419	FSS13025	C	Q6ZMZ0	1	1	0.488
VIPR_ALG4_1008913396_108_419	FSS13025	C	Q6ZN28	1	1	0.498
VIPR_ALG4_1008913396_108_419	FSS13025	C	Q6ZNA4	1	1	0.494
VIPR_ALG4_1008913396_108_419	FSS13025	C	Q6ZRI0	1	1	0.468
VIPR_ALG4_1008913396_108_419	FSS13025	C	Q6ZRR7	1	1	0.496
VIPR_ALG4_1008913396_108_419	FSS13025	C	Q6ZRS4	1	1	0.488
VIPR_ALG4_1008913396_108_419	FSS13025	C	Q6ZSB9	1	1	0.482
VIPR_ALG4_1008913396_108_419	FSS13025	C	Q6ZT12	1	1	0.48
VIPR_ALG4_1008913396_108_419	FSS13025	C	Q6ZUJ8	1	1	0.49
VIPR_ALG4_1008913396_108_419	FSS13025	C	Q6ZV73	1	1	0.486
VIPR_ALG4_1008913396_108_419	FSS13025	C	Q6ZVD8	1	1	0.498
VIPR_ALG4_1008913396_108_419	FSS13025	C	Q6ZVF9	1	1	0.48
VIPR_ALG4_1008913396_108_419	FSS13025	C	Q6ZVT6	1	1	0.478
VIPR_ALG4_1008913396_108_419	FSS13025	C	Q6ZWE6	1	1	0.474
VIPR_ALG4_1008913396_108_419	FSS13025	C	Q70CQ2	1	1	0.474
VIPR_ALG4_1008913396_108_419	FSS13025	C	Q70EK8	1	1	0.486
VIPR_ALG4_1008913396_108_419	FSS13025	C	Q70EL1	1	1	0.496
VIPR_ALG4_1008913396_108_419	FSS13025	C	Q76L83	1	1	0.496
VIPR_ALG4_1008913396_108_419	FSS13025	C	Q7L576	1	1	0.486
VIPR_ALG4_1008913396_108_419	FSS13025	C	Q7L5Y1	1	1	0.494
VIPR_ALG4_1008913396_108_419	FSS13025	C	Q7L7V1	1	1	0.492
VIPR_ALG4_1008913396_108_419	FSS13025	C	Q7L7X3	1	1	0.492
VIPR_ALG4_1008913396_108_419	FSS13025	C	Q7RTR0	1	1	0.472
VIPR_ALG4_1008913396_108_419	FSS13025	C	Q7RTY8	1	1	0.47
VIPR_ALG4_1008913396_108_419	FSS13025	C	Q7Z2W4	1	1	0.486
VIPR_ALG4_1008913396_108_419	FSS13025	C	Q7Z2Y8	1	1	0.47
VIPR_ALG4_1008913396_108_419	FSS13025	C	Q7Z353	1	1	0.452
VIPR_ALG4_1008913396_108_419	FSS13025	C	Q7Z392	1	1	0.46
VIPR_ALG4_1008913396_108_419	FSS13025	C	Q7Z3K3	1	1	0.48
VIPR_ALG4_1008913396_108_419	FSS13025	C	Q7Z3K6	1	1	0.492
VIPR_ALG4_1008913396_108_419	FSS13025	C	Q7Z3V4	1	1	0.486
VIPR_ALG4_1008913396_108_419	FSS13025	C	Q7Z3Z4	1	1	0.48
VIPR_ALG4_1008913396_108_419	FSS13025	C	Q7Z407	1	1	0.468
VIPR_ALG4_1008913396_108_419	FSS13025	C	Q7Z408	1	1	0.49
VIPR_ALG4_1008913396_108_419	FSS13025	C	Q7Z6G8	1	1	0.496
VIPR_ALG4_1008913396_108_419	FSS13025	C	Q7Z7G8	1	1	0.492
VIPR_ALG4_1008913396_108_419	FSS13025	C	Q7Z7L1	1	1	0.488
VIPR_ALG4_1008913396_108_419	FSS13025	C	Q86T96	1	1	0.48
VIPR_ALG4_1008913396_108_419	FSS13025	C	Q86TB3	1	1	0.49
VIPR_ALG4_1008913396_108_419	FSS13025	C	Q86TI2	1	1	0.498
VIPR_ALG4_1008913396_108_419	FSS13025	C	Q86UV5	1	1	0.498
VIPR_ALG4_1008913396_108_419	FSS13025	C	Q86UW7	1	1	0.484
VIPR_ALG4_1008913396_108_419	FSS13025	C	Q86W56	1	1	0.482
VIPR_ALG4_1008913396_108_419	FSS13025	C	Q86WG5	1	1	0.486
VIPR_ALG4_1008913396_108_419	FSS13025	C	Q86WI1	1	1	0.472
VIPR_ALG4_1008913396_108_419	FSS13025	C	Q86WT1	1	1	0.482
VIPR_ALG4_1008913396_108_419	FSS13025	C	Q86XT4	1	1	0.496
VIPR_ALG4_1008913396_108_419	FSS13025	C	Q86XX4	1	1	0.484
VIPR_ALG4_1008913396_108_419	FSS13025	C	Q86Y13	1	1	0.494
VIPR_ALG4_1008913396_108_419	FSS13025	C	Q86YC2	1	1	0.494
VIPR_ALG4_1008913396_108_419	FSS13025	C	Q86YR7	1	1	0.49
VIPR_ALG4_1008913396_108_419	FSS13025	C	Q86YS3	1	1	0.488
VIPR_ALG4_1008913396_108_419	FSS13025	C	Q86YV5	1	1	0.49
VIPR_ALG4_1008913396_108_419	FSS13025	C	Q86YW9	1	1	0.494
VIPR_ALG4_1008913396_108_419	FSS13025	C	Q8IUQ4	1	1	0.458
VIPR_ALG4_1008913396_108_419	FSS13025	C	Q8IV76	1	1	0.448
VIPR_ALG4_1008913396_108_419	FSS13025	C	Q8IVF5	1	1	0.476
VIPR_ALG4_1008913396_108_419	FSS13025	C	Q8IWA0	1	1	0.498
VIPR_ALG4_1008913396_108_419	FSS13025	C	Q8IWB1	1	1	0.492
VIPR_ALG4_1008913396_108_419	FSS13025	C	Q8IWG1	1	1	0.448
VIPR_ALG4_1008913396_108_419	FSS13025	C	Q8IWR0	1	1	0.498
VIPR_ALG4_1008913396_108_419	FSS13025	C	Q8IWT3	1	1	0.472
VIPR_ALG4_1008913396_108_419	FSS13025	C	Q8IWU5	1	1	0.494
VIPR_ALG4_1008913396_108_419	FSS13025	C	Q8IWV7	1	1	0.48
VIPR_ALG4_1008913396_108_419	FSS13025	C	Q8IWV8	1	1	0.432
VIPR_ALG4_1008913396_108_419	FSS13025	C	Q8IWZ5	1	1	0.456
VIPR_ALG4_1008913396_108_419	FSS13025	C	Q8IXH7	1	1	0.484
VIPR_ALG4_1008913396_108_419	FSS13025	C	Q8IY47	1	1	0.488
VIPR_ALG4_1008913396_108_419	FSS13025	C	Q8IYA6	1	1	0.488
VIPR_ALG4_1008913396_108_419	FSS13025	C	Q8IYD8	1	1	0.472
VIPR_ALG4_1008913396_108_419	FSS13025	C	Q8IYF3	1	1	0.498
VIPR_ALG4_1008913396_108_419	FSS13025	C	Q8IYH5	1	1	0.488
VIPR_ALG4_1008913396_108_419	FSS13025	C	Q8IYQ7	1	1	0.498
VIPR_ALG4_1008913396_108_419	FSS13025	C	Q8IYT2	1	1	0.48
VIPR_ALG4_1008913396_108_419	FSS13025	C	Q8IYT8	1	1	0.498
VIPR_ALG4_1008913396_108_419	FSS13025	C	Q8IYU2	1	1	0.488
VIPR_ALG4_1008913396_108_419	FSS13025	C	Q8IYY4	1	1	0.496
VIPR_ALG4_1008913396_108_419	FSS13025	C	Q8IZH2	1	1	0.496
VIPR_ALG4_1008913396_108_419	FSS13025	C	Q8IZS8	1	1	0.48
VIPR_ALG4_1008913396_108_419	FSS13025	C	Q8N2E2	1	1	0.462
VIPR_ALG4_1008913396_108_419	FSS13025	C	Q8N344	1	1	0.48
VIPR_ALG4_1008913396_108_419	FSS13025	C	Q8N3E9	1	1	0.486
VIPR_ALG4_1008913396_108_419	FSS13025	C	Q8N3T1	1	1	0.486
VIPR_ALG4_1008913396_108_419	FSS13025	C	Q8N448	1	1	0.498
VIPR_ALG4_1008913396_108_419	FSS13025	C	Q8N4B4	1	1	0.49
VIPR_ALG4_1008913396_108_419	FSS13025	C	Q8N5U6	1	1	0.49
VIPR_ALG4_1008913396_108_419	FSS13025	C	Q8N608	1	1	0.496
VIPR_ALG4_1008913396_108_419	FSS13025	C	Q8N6G6	1	1	0.49
VIPR_ALG4_1008913396_108_419	FSS13025	C	Q8N806	1	1	0.498
VIPR_ALG4_1008913396_108_419	FSS13025	C	Q8N841	1	1	0.478
VIPR_ALG4_1008913396_108_419	FSS13025	C	Q8N8K9	1	1	0.472
VIPR_ALG4_1008913396_108_419	FSS13025	C	Q8N8U9	1	1	0.478
VIPR_ALG4_1008913396_108_419	FSS13025	C	Q8N9V7	1	1	0.45
VIPR_ALG4_1008913396_108_419	FSS13025	C	Q8NA54	1	1	0.49
VIPR_ALG4_1008913396_108_419	FSS13025	C	Q8NA82	1	1	0.498
VIPR_ALG4_1008913396_108_419	FSS13025	C	Q8NAB2	1	1	0.476
VIPR_ALG4_1008913396_108_419	FSS13025	C	Q8NDM7	1	1	0.47
VIPR_ALG4_1008913396_108_419	FSS13025	C	Q8NE09	1	1	0.486
VIPR_ALG4_1008913396_108_419	FSS13025	C	Q8NEA9	1	1	0.498
VIPR_ALG4_1008913396_108_419	FSS13025	C	Q8NEB7	1	1	0.498
VIPR_ALG4_1008913396_108_419	FSS13025	C	Q8NEE6	1	1	0.484
VIPR_ALG4_1008913396_108_419	FSS13025	C	Q8NEV1	1	1	0.484
VIPR_ALG4_1008913396_108_419	FSS13025	C	Q8NEZ4	1	1	0.468
VIPR_ALG4_1008913396_108_419	FSS13025	C	Q8NFA0	1	1	0.494
VIPR_ALG4_1008913396_108_419	FSS13025	C	Q8NFP9	1	1	0.496
VIPR_ALG4_1008913396_108_419	FSS13025	C	Q8NFT8	1	1	0.452
VIPR_ALG4_1008913396_108_419	FSS13025	C	Q8NFU7	1	1	0.458
VIPR_ALG4_1008913396_108_419	FSS13025	C	Q8NHM5	1	1	0.49
VIPR_ALG4_1008913396_108_419	FSS13025	C	Q8NHY2	1	1	0.484
VIPR_ALG4_1008913396_108_419	FSS13025	C	Q8TB52	1	1	0.454
VIPR_ALG4_1008913396_108_419	FSS13025	C	Q8TC07	1	1	0.488
VIPR_ALG4_1008913396_108_419	FSS13025	C	Q8TC27	1	1	0.462
VIPR_ALG4_1008913396_108_419	FSS13025	C	Q8TDF6	1	1	0.494
VIPR_ALG4_1008913396_108_419	FSS13025	C	Q8TDJ6	1	1	0.482
VIPR_ALG4_1008913396_108_419	FSS13025	C	Q8TDN2	1	1	0.494
VIPR_ALG4_1008913396_108_419	FSS13025	C	Q8TE85	1	1	0.496
VIPR_ALG4_1008913396_108_419	FSS13025	C	Q8TEB1	1	1	0.498
VIPR_ALG4_1008913396_108_419	FSS13025	C	Q8TEP8	1	1	0.498
VIPR_ALG4_1008913396_108_419	FSS13025	C	Q8TEY7	1	1	0.48
VIPR_ALG4_1008913396_108_419	FSS13025	C	Q8TF40	1	1	0.456
VIPR_ALG4_1008913396_108_419	FSS13025	C	Q8TF46	1	1	0.488
VIPR_ALG4_1008913396_108_419	FSS13025	C	Q8WUM0	1	1	0.476
VIPR_ALG4_1008913396_108_419	FSS13025	C	Q8WWQ8	1	1	0.464
VIPR_ALG4_1008913396_108_419	FSS13025	C	Q8WWU5	1	1	0.488
VIPR_ALG4_1008913396_108_419	FSS13025	C	Q8WXE9	1	1	0.498
VIPR_ALG4_1008913396_108_419	FSS13025	C	Q8WXH5	1	1	0.486
VIPR_ALG4_1008913396_108_419	FSS13025	C	Q8WXS8	1	1	0.488
VIPR_ALG4_1008913396_108_419	FSS13025	C	Q8WY21	1	1	0.494
VIPR_ALG4_1008913396_108_419	FSS13025	C	Q8WY54	1	1	0.494
VIPR_ALG4_1008913396_108_419	FSS13025	C	Q8WZ74	1	1	0.492
VIPR_ALG4_1008913396_108_419	FSS13025	C	Q92502	1	1	0.494
VIPR_ALG4_1008913396_108_419	FSS13025	C	Q92563	1	1	0.49
VIPR_ALG4_1008913396_108_419	FSS13025	C	Q92585	1	1	0.486
VIPR_ALG4_1008913396_108_419	FSS13025	C	Q92622	1	1	0.498
VIPR_ALG4_1008913396_108_419	FSS13025	C	Q92626	1	1	0.484
VIPR_ALG4_1008913396_108_419	FSS13025	C	Q92681	1	1	0.478
VIPR_ALG4_1008913396_108_419	FSS13025	C	Q92764	1	1	0.492
VIPR_ALG4_1008913396_108_419	FSS13025	C	Q92793	1	1	0.442
VIPR_ALG4_1008913396_108_419	FSS13025	C	Q92794	1	1	0.476
VIPR_ALG4_1008913396_108_419	FSS13025	C	Q92833	1	1	0.484
VIPR_ALG4_1008913396_108_419	FSS13025	C	Q92845	1	1	0.476
VIPR_ALG4_1008913396_108_419	FSS13025	C	Q92854	1	1	0.484
VIPR_ALG4_1008913396_108_419	FSS13025	C	Q92870	1	1	0.494
VIPR_ALG4_1008913396_108_419	FSS13025	C	Q92896	1	1	0.488
VIPR_ALG4_1008913396_108_419	FSS13025	C	Q92973	1	1	0.458
VIPR_ALG4_1008913396_108_419	FSS13025	C	Q93008	1	1	0.464
VIPR_ALG4_1008913396_108_419	FSS13025	C	Q93009	1	1	0.334
VIPR_ALG4_1008913396_108_419	FSS13025	C	Q93034	1	1	0.404
VIPR_ALG4_1008913396_108_419	FSS13025	C	Q93073	1	1	0.478
VIPR_ALG4_1008913396_108_419	FSS13025	C	Q96A70	1	1	0.476
VIPR_ALG4_1008913396_108_419	FSS13025	C	Q96AC1	1	1	0.496
VIPR_ALG4_1008913396_108_419	FSS13025	C	Q96B26	1	1	0.498
VIPR_ALG4_1008913396_108_419	FSS13025	C	Q96EP0	1	1	0.484
VIPR_ALG4_1008913396_108_419	FSS13025	C	Q96EP1	1	1	0.482
VIPR_ALG4_1008913396_108_419	FSS13025	C	Q96ER3	1	1	0.486
VIPR_ALG4_1008913396_108_419	FSS13025	C	Q96G75	1	1	0.494
VIPR_ALG4_1008913396_108_419	FSS13025	C	Q96HA7	1	1	0.472
VIPR_ALG4_1008913396_108_419	FSS13025	C	Q96JB3	1	1	0.48
VIPR_ALG4_1008913396_108_419	FSS13025	C	Q96JI7	1	1	0.492
VIPR_ALG4_1008913396_108_419	FSS13025	C	Q96JM7	1	1	0.462
VIPR_ALG4_1008913396_108_419	FSS13025	C	Q96JS3	1	1	0.492
VIPR_ALG4_1008913396_108_419	FSS13025	C	Q96K83	1	1	0.452
VIPR_ALG4_1008913396_108_419	FSS13025	C	Q96KP1	1	1	0.49
VIPR_ALG4_1008913396_108_419	FSS13025	C	Q96LU7	1	1	0.488
VIPR_ALG4_1008913396_108_419	FSS13025	C	Q96MH7	1	1	0.466
VIPR_ALG4_1008913396_108_419	FSS13025	C	Q96MN2	1	1	0.498
VIPR_ALG4_1008913396_108_419	FSS13025	C	Q96MT3	1	1	0.466
VIPR_ALG4_1008913396_108_419	FSS13025	C	Q96PZ7	1	1	0.476
VIPR_ALG4_1008913396_108_419	FSS13025	C	Q96QP1	1	1	0.498
VIPR_ALG4_1008913396_108_419	FSS13025	C	Q96QT6	1	1	0.496
VIPR_ALG4_1008913396_108_419	FSS13025	C	Q96QV1	1	1	0.45
VIPR_ALG4_1008913396_108_419	FSS13025	C	Q96QZ7	1	1	0.45
VIPR_ALG4_1008913396_108_419	FSS13025	C	Q96RS0	1	1	0.486
VIPR_ALG4_1008913396_108_419	FSS13025	C	Q96S65	1	1	0.486
VIPR_ALG4_1008913396_108_419	FSS13025	C	Q96ST3	1	1	0.496
VIPR_ALG4_1008913396_108_419	FSS13025	C	Q99435	1	1	0.474
VIPR_ALG4_1008913396_108_419	FSS13025	C	Q99567	1	1	0.478
VIPR_ALG4_1008913396_108_419	FSS13025	C	Q99650	1	1	0.494
VIPR_ALG4_1008913396_108_419	FSS13025	C	Q99767	1	1	0.488
VIPR_ALG4_1008913396_108_419	FSS13025	C	Q99985	1	1	0.492
VIPR_ALG4_1008913396_108_419	FSS13025	C	Q9BQ31	1	1	0.484
VIPR_ALG4_1008913396_108_419	FSS13025	C	Q9BQA5	1	1	0.486
VIPR_ALG4_1008913396_108_419	FSS13025	C	Q9BRC7	1	1	0.488
VIPR_ALG4_1008913396_108_419	FSS13025	C	Q9BSU3	1	1	0.488
VIPR_ALG4_1008913396_108_419	FSS13025	C	Q9BTE0	1	1	0.468
VIPR_ALG4_1008913396_108_419	FSS13025	C	Q9BUF5	1	1	0.49
VIPR_ALG4_1008913396_108_419	FSS13025	C	Q9BUR4	1	1	0.456
VIPR_ALG4_1008913396_108_419	FSS13025	C	Q9BX63	1	1	0.47
VIPR_ALG4_1008913396_108_419	FSS13025	C	Q9BXB4	1	1	0.464
VIPR_ALG4_1008913396_108_419	FSS13025	C	Q9BXJ9	1	1	0.482
VIPR_ALG4_1008913396_108_419	FSS13025	C	Q9BXT4	1	1	0.47
VIPR_ALG4_1008913396_108_419	FSS13025	C	Q9BXT5	1	1	0.486
VIPR_ALG4_1008913396_108_419	FSS13025	C	Q9BXW6	1	1	0.488
VIPR_ALG4_1008913396_108_419	FSS13025	C	Q9BY66	1	1	0.47
VIPR_ALG4_1008913396_108_419	FSS13025	C	Q9BYX4	1	1	0.466
VIPR_ALG4_1008913396_108_419	FSS13025	C	Q9BZF1	1	1	0.492
VIPR_ALG4_1008913396_108_419	FSS13025	C	Q9BZQ8	1	1	0.484
VIPR_ALG4_1008913396_108_419	FSS13025	C	Q9BZR9	1	1	0.494
VIPR_ALG4_1008913396_108_419	FSS13025	C	Q9C040	1	1	0.474
VIPR_ALG4_1008913396_108_419	FSS13025	C	Q9C0A6	1	1	0.466
VIPR_ALG4_1008913396_108_419	FSS13025	C	Q9C0B0	1	1	0.47
VIPR_ALG4_1008913396_108_419	FSS13025	C	Q9C0C7	1	1	0.486
VIPR_ALG4_1008913396_108_419	FSS13025	C	Q9C0D4	1	1	0.486
VIPR_ALG4_1008913396_108_419	FSS13025	C	Q9C0G0	1	1	0.466
VIPR_ALG4_1008913396_108_419	FSS13025	C	Q9GZR1	1	1	0.488
VIPR_ALG4_1008913396_108_419	FSS13025	C	Q9H069	1	1	0.488
VIPR_ALG4_1008913396_108_419	FSS13025	C	Q9H089	1	1	0.482
VIPR_ALG4_1008913396_108_419	FSS13025	C	Q9H175	1	1	0.49
VIPR_ALG4_1008913396_108_419	FSS13025	C	Q9H1K0	1	1	0.488
VIPR_ALG4_1008913396_108_419	FSS13025	C	Q9H1P3	1	1	0.482
VIPR_ALG4_1008913396_108_419	FSS13025	C	Q9H270	1	1	0.478
VIPR_ALG4_1008913396_108_419	FSS13025	C	Q9H2S6	1	1	0.462
VIPR_ALG4_1008913396_108_419	FSS13025	C	Q9H2Y7	1	1	0.466
VIPR_ALG4_1008913396_108_419	FSS13025	C	Q9H3M9	1	1	0.476
VIPR_ALG4_1008913396_108_419	FSS13025	C	Q9H3R0	1	1	0.496
VIPR_ALG4_1008913396_108_419	FSS13025	C	Q9H4B7	1	1	0.492
VIPR_ALG4_1008913396_108_419	FSS13025	C	Q9H4D0	1	1	0.408
VIPR_ALG4_1008913396_108_419	FSS13025	C	Q9H4P4	1	1	0.494
VIPR_ALG4_1008913396_108_419	FSS13025	C	Q9H582	1	1	0.484
VIPR_ALG4_1008913396_108_419	FSS13025	C	Q9H792	1	1	0.492
VIPR_ALG4_1008913396_108_419	FSS13025	C	Q9H9A5	1	1	0.468
VIPR_ALG4_1008913396_108_419	FSS13025	C	Q9H9A6	1	1	0.496
VIPR_ALG4_1008913396_108_419	FSS13025	C	Q9H9E3	1	1	0.456
VIPR_ALG4_1008913396_108_419	FSS13025	C	Q9HAU4	1	1	0.424
VIPR_ALG4_1008913396_108_419	FSS13025	C	Q9HCE7	1	1	0.474
VIPR_ALG4_1008913396_108_419	FSS13025	C	Q9HCI7	1	1	0.474
VIPR_ALG4_1008913396_108_419	FSS13025	C	Q9HCK0	1	1	0.484
VIPR_ALG4_1008913396_108_419	FSS13025	C	Q9HCM9	1	1	0.492
VIPR_ALG4_1008913396_108_419	FSS13025	C	Q9NQ36	1	1	0.478
VIPR_ALG4_1008913396_108_419	FSS13025	C	Q9NQ75	1	1	0.476
VIPR_ALG4_1008913396_108_419	FSS13025	C	Q9NQX1	1	1	0.492
VIPR_ALG4_1008913396_108_419	FSS13025	C	Q9NR09	1	1	0.488
VIPR_ALG4_1008913396_108_419	FSS13025	C	Q9NRE2	1	1	0.498
VIPR_ALG4_1008913396_108_419	FSS13025	C	Q9NRH3	1	1	0.482
VIPR_ALG4_1008913396_108_419	FSS13025	C	Q9NRM2	1	1	0.498
VIPR_ALG4_1008913396_108_419	FSS13025	C	Q9NSI6	1	1	0.498
VIPR_ALG4_1008913396_108_419	FSS13025	C	Q9NUA8	1	1	0.486
VIPR_ALG4_1008913396_108_419	FSS13025	C	Q9NUY8	1	1	0.498
VIPR_ALG4_1008913396_108_419	FSS13025	C	Q9NV70	1	1	0.488
VIPR_ALG4_1008913396_108_419	FSS13025	C	Q9NVM4	1	1	0.494
VIPR_ALG4_1008913396_108_419	FSS13025	C	Q9NVN8	1	1	0.478
VIPR_ALG4_1008913396_108_419	FSS13025	C	Q9NW38	1	1	0.496
VIPR_ALG4_1008913396_108_419	FSS13025	C	Q9NWF9	1	1	0.48
VIPR_ALG4_1008913396_108_419	FSS13025	C	Q9NWZ3	1	1	0.498
VIPR_ALG4_1008913396_108_419	FSS13025	C	Q9NX02	1	1	0.486
VIPR_ALG4_1008913396_108_419	FSS13025	C	Q9NYA4	1	1	0.49
VIPR_ALG4_1008913396_108_419	FSS13025	C	Q9NZ09	1	1	0.488
VIPR_ALG4_1008913396_108_419	FSS13025	C	Q9NZL6	1	1	0.498
VIPR_ALG4_1008913396_108_419	FSS13025	C	Q9NZR2	1	1	0.46
VIPR_ALG4_1008913396_108_419	FSS13025	C	Q9P0K1	1	1	0.488
VIPR_ALG4_1008913396_108_419	FSS13025	C	Q9P0P0	1	1	0.484
VIPR_ALG4_1008913396_108_419	FSS13025	C	Q9P104	1	1	0.476
VIPR_ALG4_1008913396_108_419	FSS13025	C	Q9P212	1	1	0.49
VIPR_ALG4_1008913396_108_419	FSS13025	C	Q9P253	1	1	0.49
VIPR_ALG4_1008913396_108_419	FSS13025	C	Q9P260	1	1	0.498
VIPR_ALG4_1008913396_108_419	FSS13025	C	Q9P273	1	1	0.466
VIPR_ALG4_1008913396_108_419	FSS13025	C	Q9P2D0	1	1	0.494
VIPR_ALG4_1008913396_108_419	FSS13025	C	Q9P2D6	1	1	0.49
VIPR_ALG4_1008913396_108_419	FSS13025	C	Q9P2E3	1	1	0.464
VIPR_ALG4_1008913396_108_419	FSS13025	C	Q9P2F6	1	1	0.498
VIPR_ALG4_1008913396_108_419	FSS13025	C	Q9P2G1	1	1	0.48
VIPR_ALG4_1008913396_108_419	FSS13025	C	Q9P2K6	1	1	0.498
VIPR_ALG4_1008913396_108_419	FSS13025	C	Q9P2N4	1	1	0.438
VIPR_ALG4_1008913396_108_419	FSS13025	C	Q9P2P5	1	1	0.496
VIPR_ALG4_1008913396_108_419	FSS13025	C	Q9P2P6	1	1	0.462
VIPR_ALG4_1008913396_108_419	FSS13025	C	Q9UBG0	1	1	0.496
VIPR_ALG4_1008913396_108_419	FSS13025	C	Q9UBS8	1	1	0.484
VIPR_ALG4_1008913396_108_419	FSS13025	C	Q9UBT6	1	1	0.48
VIPR_ALG4_1008913396_108_419	FSS13025	C	Q9UBU9	1	1	0.48
VIPR_ALG4_1008913396_108_419	FSS13025	C	Q9UBW7	1	1	0.492
VIPR_ALG4_1008913396_108_419	FSS13025	C	Q9UBX5	1	1	0.48
VIPR_ALG4_1008913396_108_419	FSS13025	C	Q9UGI0	1	1	0.49
VIPR_ALG4_1008913396_108_419	FSS13025	C	Q9UGL1	1	1	0.472
VIPR_ALG4_1008913396_108_419	FSS13025	C	Q9UH17	1	1	0.496
VIPR_ALG4_1008913396_108_419	FSS13025	C	Q9UH90	1	1	0.462
VIPR_ALG4_1008913396_108_419	FSS13025	C	Q9UHC1	1	1	0.464
VIPR_ALG4_1008913396_108_419	FSS13025	C	Q9UHF7	1	1	0.45
VIPR_ALG4_1008913396_108_419	FSS13025	C	Q9UHI8	1	1	0.47
VIPR_ALG4_1008913396_108_419	FSS13025	C	Q9UHV7	1	1	0.496
VIPR_ALG4_1008913396_108_419	FSS13025	C	Q9UIA9	1	1	0.488
VIPR_ALG4_1008913396_108_419	FSS13025	C	Q9UID6	1	1	0.474
VIPR_ALG4_1008913396_108_419	FSS13025	C	Q9UIF9	1	1	0.492
VIPR_ALG4_1008913396_108_419	FSS13025	C	Q9UII4	1	1	0.476
VIPR_ALG4_1008913396_108_419	FSS13025	C	Q9UIQ6	1	1	0.488
VIPR_ALG4_1008913396_108_419	FSS13025	C	Q9UIY3	1	1	0.486
VIPR_ALG4_1008913396_108_419	FSS13025	C	Q9UJ71	1	1	0.486
VIPR_ALG4_1008913396_108_419	FSS13025	C	Q9UJV3	1	1	0.474
VIPR_ALG4_1008913396_108_419	FSS13025	C	Q9UKF5	1	1	0.468
VIPR_ALG4_1008913396_108_419	FSS13025	C	Q9UKQ2	1	1	0.476
VIPR_ALG4_1008913396_108_419	FSS13025	C	Q9UKV5	1	1	0.46
VIPR_ALG4_1008913396_108_419	FSS13025	C	Q9UKW4	1	1	0.458
VIPR_ALG4_1008913396_108_419	FSS13025	C	Q9UL52	1	1	0.482
VIPR_ALG4_1008913396_108_419	FSS13025	C	Q9UL58	1	1	0.498
VIPR_ALG4_1008913396_108_419	FSS13025	C	Q9ULD4	1	1	0.498
VIPR_ALG4_1008913396_108_419	FSS13025	C	Q9ULD5	1	1	0.486
VIPR_ALG4_1008913396_108_419	FSS13025	C	Q9ULI1	1	1	0.452
VIPR_ALG4_1008913396_108_419	FSS13025	C	Q9ULJ3	1	1	0.498
VIPR_ALG4_1008913396_108_419	FSS13025	C	Q9ULL1	1	1	0.476
VIPR_ALG4_1008913396_108_419	FSS13025	C	Q9ULL8	1	1	0.45
VIPR_ALG4_1008913396_108_419	FSS13025	C	Q9ULM0	1	1	0.488
VIPR_ALG4_1008913396_108_419	FSS13025	C	Q9ULT8	1	1	0.496
VIPR_ALG4_1008913396_108_419	FSS13025	C	Q9ULV0	1	1	0.484
VIPR_ALG4_1008913396_108_419	FSS13025	C	Q9ULX7	1	1	0.498
VIPR_ALG4_1008913396_108_419	FSS13025	C	Q9UMQ6	1	1	0.488
VIPR_ALG4_1008913396_108_419	FSS13025	C	Q9UPP1	1	1	0.49
VIPR_ALG4_1008913396_108_419	FSS13025	C	Q9UPQ7	1	1	0.482
VIPR_ALG4_1008913396_108_419	FSS13025	C	Q9UPR3	1	1	0.496
VIPR_ALG4_1008913396_108_419	FSS13025	C	Q9UPT9	1	1	0.488
VIPR_ALG4_1008913396_108_419	FSS13025	C	Q9UPU5	1	1	0.478
VIPR_ALG4_1008913396_108_419	FSS13025	C	Q9UPW5	1	1	0.486
VIPR_ALG4_1008913396_108_419	FSS13025	C	Q9UPY3	1	1	0.48
VIPR_ALG4_1008913396_108_419	FSS13025	C	Q9UQC2	1	1	0.494
VIPR_ALG4_1008913396_108_419	FSS13025	C	Q9Y263	1	1	0.476
VIPR_ALG4_1008913396_108_419	FSS13025	C	Q9Y2F5	1	1	0.46
VIPR_ALG4_1008913396_108_419	FSS13025	C	Q9Y2K1	1	1	0.46
VIPR_ALG4_1008913396_108_419	FSS13025	C	Q9Y2K6	1	1	0.474
VIPR_ALG4_1008913396_108_419	FSS13025	C	Q9Y2K9	1	1	0.49
VIPR_ALG4_1008913396_108_419	FSS13025	C	Q9Y2M0	1	1	0.478
VIPR_ALG4_1008913396_108_419	FSS13025	C	Q9Y2X0	1	1	0.462
VIPR_ALG4_1008913396_108_419	FSS13025	C	Q9Y3Q7	1	1	0.48
VIPR_ALG4_1008913396_108_419	FSS13025	C	Q9Y3Z3	1	1	0.4
VIPR_ALG4_1008913396_108_419	FSS13025	C	Q9Y462	1	1	0.484
VIPR_ALG4_1008913396_108_419	FSS13025	C	Q9Y485	1	1	0.486
VIPR_ALG4_1008913396_108_419	FSS13025	C	Q9Y4A0	1	1	0.49
VIPR_ALG4_1008913396_108_419	FSS13025	C	Q9Y4A5	1	1	0.486
VIPR_ALG4_1008913396_108_419	FSS13025	C	Q9Y4B4	1	1	0.498
VIPR_ALG4_1008913396_108_419	FSS13025	C	Q9Y4B6	1	1	0.464
VIPR_ALG4_1008913396_108_419	FSS13025	C	Q9Y4C1	1	1	0.498
VIPR_ALG4_1008913396_108_419	FSS13025	C	Q9Y4E5	1	1	0.47
VIPR_ALG4_1008913396_108_419	FSS13025	C	Q9Y4F3	1	1	0.446
VIPR_ALG4_1008913396_108_419	FSS13025	C	Q9Y4G8	1	1	0.498
VIPR_ALG4_1008913396_108_419	FSS13025	C	Q9Y4K0	1	1	0.484
VIPR_ALG4_1008913396_108_419	FSS13025	C	Q9Y4K3	1	1	0.48
VIPR_ALG4_1008913396_108_419	FSS13025	C	Q9Y508	1	1	0.492
VIPR_ALG4_1008913396_108_419	FSS13025	C	Q9Y561	1	1	0.488
VIPR_ALG4_1008913396_108_419	FSS13025	C	Q9Y5A7	1	1	0.492
VIPR_ALG4_1008913396_108_419	FSS13025	C	Q9Y5P8	1	1	0.476
VIPR_ALG4_1008913396_108_419	FSS13025	C	Q9Y5Q5	1	1	0.446
VIPR_ALG4_1008913396_108_419	FSS13025	C	Q9Y5T5	1	1	0.498
VIPR_ALG4_1008913396_108_419	FSS13025	C	Q9Y5X1	1	1	0.49
VIPR_ALG4_1008913396_108_419	FSS13025	C	Q9Y692	1	1	0.498
VIPR_ALG4_1008913396_108_419	FSS13025	C	Q9Y6D5	1	1	0.492
VIPR_ALG4_1008913396_108_419	FSS13025	C	Q9Y6D6	1	1	0.486
VIPR_ALG4_1008913396_108_419	FSS13025	C	Q9Y6H5	1	1	0.492
VIPR_ALG4_1008913396_108_419	FSS13025	C	Q9Y6K9	1	1	0.452
VIPR_ALG4_1008913396_108_419	FSS13025	C	Q9Y6L7	1	1	0.482
VIPR_ALG4_1008913396_108_419	FSS13025	C	Q9Y6Q2	1	1	0.492
VIPR_ALG4_1008913396_108_419	FSS13025	C	Q9Y6X3	1	1	0.494
VIPR_ALG4_1008913396_108_473	FSS13025	ancC	A0A0A0MTC1	1	1	0.472
VIPR_ALG4_1008913396_108_473	FSS13025	ancC	A0A0G2JMS6	1	1	0.496
VIPR_ALG4_1008913396_108_473	FSS13025	ancC	A0A0G2JMZ2	1	1	0.474
VIPR_ALG4_1008913396_108_473	FSS13025	ancC	A0A0G2JP20	1	1	0.456
VIPR_ALG4_1008913396_108_473	FSS13025	ancC	A0A0G2JPQ2	1	1	0.486
VIPR_ALG4_1008913396_108_473	FSS13025	ancC	A0A140TA62	1	1	0.452
VIPR_ALG4_1008913396_108_473	FSS13025	ancC	A0A1B0GVI7	1	1	0.48
VIPR_ALG4_1008913396_108_473	FSS13025	ancC	A0A2R8Y872	1	1	0.468
VIPR_ALG4_1008913396_108_473	FSS13025	ancC	A0A2R8YFF1	1	1	0.496
VIPR_ALG4_1008913396_108_473	FSS13025	ancC	A0AVK6	1	1	0.482
VIPR_ALG4_1008913396_108_473	FSS13025	ancC	A0JNW5	1	1	0.49
VIPR_ALG4_1008913396_108_473	FSS13025	ancC	A0MZ66	1	1	0.494
VIPR_ALG4_1008913396_108_473	FSS13025	ancC	A1KZ92	1	1	0.478
VIPR_ALG4_1008913396_108_473	FSS13025	ancC	A2A3K4	1	1	0.476
VIPR_ALG4_1008913396_108_473	FSS13025	ancC	A2A3N6	1	1	0.492
VIPR_ALG4_1008913396_108_473	FSS13025	ancC	A2PYH4	1	1	0.476
VIPR_ALG4_1008913396_108_473	FSS13025	ancC	A2RRP1	1	1	0.448
VIPR_ALG4_1008913396_108_473	FSS13025	ancC	A2RTX5	1	1	0.488
VIPR_ALG4_1008913396_108_473	FSS13025	ancC	A2RUS2	1	1	0.488
VIPR_ALG4_1008913396_108_473	FSS13025	ancC	A2VDJ0	1	1	0.482
VIPR_ALG4_1008913396_108_473	FSS13025	ancC	A3QJZ7	1	1	0.458
VIPR_ALG4_1008913396_108_473	FSS13025	ancC	A4D0S4	1	1	0.462
VIPR_ALG4_1008913396_108_473	FSS13025	ancC	A4D1E1	1	1	0.46
VIPR_ALG4_1008913396_108_473	FSS13025	ancC	A4D1F6	1	1	0.482
VIPR_ALG4_1008913396_108_473	FSS13025	ancC	A4QPH2	1	1	0.474
VIPR_ALG4_1008913396_108_473	FSS13025	ancC	A5PLK6	1	1	0.498
VIPR_ALG4_1008913396_108_473	FSS13025	ancC	A6NDR6	1	1	0.484
VIPR_ALG4_1008913396_108_473	FSS13025	ancC	A6NDU8	1	1	0.496
VIPR_ALG4_1008913396_108_473	FSS13025	ancC	A6NES4	1	1	0.47
VIPR_ALG4_1008913396_108_473	FSS13025	ancC	A6NGG8	1	1	0.484
VIPR_ALG4_1008913396_108_473	FSS13025	ancC	A6NGN4	1	1	0.492
VIPR_ALG4_1008913396_108_473	FSS13025	ancC	A6NHC0	1	1	0.462
VIPR_ALG4_1008913396_108_473	FSS13025	ancC	A6NIR3	1	1	0.456
VIPR_ALG4_1008913396_108_473	FSS13025	ancC	A6NIV6	1	1	0.486
VIPR_ALG4_1008913396_108_473	FSS13025	ancC	A6NK02	1	1	0.492
VIPR_ALG4_1008913396_108_473	FSS13025	ancC	A6NKG5	1	1	0.476
VIPR_ALG4_1008913396_108_473	FSS13025	ancC	A6NLI5	1	1	0.484
VIPR_ALG4_1008913396_108_473	FSS13025	ancC	A6NM11	1	1	0.476
VIPR_ALG4_1008913396_108_473	FSS13025	ancC	A6NM36	1	1	0.494
VIPR_ALG4_1008913396_108_473	FSS13025	ancC	A6NM62	1	1	0.496
VIPR_ALG4_1008913396_108_473	FSS13025	ancC	A6NMK8	1	1	0.488
VIPR_ALG4_1008913396_108_473	FSS13025	ancC	A6NMS7	1	1	0.476
VIPR_ALG4_1008913396_108_473	FSS13025	ancC	A6NNZ2	1	1	0.486
VIPR_ALG4_1008913396_108_473	FSS13025	ancC	A8MVM7	1	1	0.466
VIPR_ALG4_1008913396_108_473	FSS13025	ancC	A8MWY0	1	1	0.49
VIPR_ALG4_1008913396_108_473	FSS13025	ancC	A8MYU2	1	1	0.496
VIPR_ALG4_1008913396_108_473	FSS13025	ancC	A8MYZ0	1	1	0.49
VIPR_ALG4_1008913396_108_473	FSS13025	ancC	B1AKI9	1	1	0.48
VIPR_ALG4_1008913396_108_473	FSS13025	ancC	B3KU38	1	1	0.494
VIPR_ALG4_1008913396_108_473	FSS13025	ancC	B5MCY1	1	1	0.49
VIPR_ALG4_1008913396_108_473	FSS13025	ancC	C9JQI7	1	1	0.458
VIPR_ALG4_1008913396_108_473	FSS13025	ancC	G9CGD6	1	1	0.468
VIPR_ALG4_1008913396_108_473	FSS13025	ancC	H7C0S8	1	1	0.498
VIPR_ALG4_1008913396_108_473	FSS13025	ancC	I1YAP6	1	1	0.482
VIPR_ALG4_1008913396_108_473	FSS13025	ancC	O00203	1	1	0.486
VIPR_ALG4_1008913396_108_473	FSS13025	ancC	O00237	1	1	0.47
VIPR_ALG4_1008913396_108_473	FSS13025	ancC	O00300	1	1	0.474
VIPR_ALG4_1008913396_108_473	FSS13025	ancC	O00408	1	1	0.458
VIPR_ALG4_1008913396_108_473	FSS13025	ancC	O00410	1	1	0.448
VIPR_ALG4_1008913396_108_473	FSS13025	ancC	O00443	1	1	0.462
VIPR_ALG4_1008913396_108_473	FSS13025	ancC	O00463	1	1	0.468
VIPR_ALG4_1008913396_108_473	FSS13025	ancC	O00471	1	1	0.462
VIPR_ALG4_1008913396_108_473	FSS13025	ancC	O00482	1	1	0.49
VIPR_ALG4_1008913396_108_473	FSS13025	ancC	O00507	1	1	0.446
VIPR_ALG4_1008913396_108_473	FSS13025	ancC	O14525	1	1	0.488
VIPR_ALG4_1008913396_108_473	FSS13025	ancC	O14545	1	1	0.47
VIPR_ALG4_1008913396_108_473	FSS13025	ancC	O14594	1	1	0.48
VIPR_ALG4_1008913396_108_473	FSS13025	ancC	O14607	1	1	0.448
VIPR_ALG4_1008913396_108_473	FSS13025	ancC	O14638	1	1	0.468
VIPR_ALG4_1008913396_108_473	FSS13025	ancC	O14653	1	1	0.498
VIPR_ALG4_1008913396_108_473	FSS13025	ancC	O14727	1	1	0.43
VIPR_ALG4_1008913396_108_473	FSS13025	ancC	O14757	1	1	0.496
VIPR_ALG4_1008913396_108_473	FSS13025	ancC	O14786	1	1	0.482
VIPR_ALG4_1008913396_108_473	FSS13025	ancC	O14827	1	1	0.478
VIPR_ALG4_1008913396_108_473	FSS13025	ancC	O14829	1	1	0.464
VIPR_ALG4_1008913396_108_473	FSS13025	ancC	O14830	1	1	0.484
VIPR_ALG4_1008913396_108_473	FSS13025	ancC	O14920	1	1	0.376
VIPR_ALG4_1008913396_108_473	FSS13025	ancC	O14964	1	1	0.484
VIPR_ALG4_1008913396_108_473	FSS13025	ancC	O14981	1	1	0.474
VIPR_ALG4_1008913396_108_473	FSS13025	ancC	O15014	1	1	0.49
VIPR_ALG4_1008913396_108_473	FSS13025	ancC	O15015	1	1	0.472
VIPR_ALG4_1008913396_108_473	FSS13025	ancC	O15018	1	1	0.48
VIPR_ALG4_1008913396_108_473	FSS13025	ancC	O15031	1	1	0.468
VIPR_ALG4_1008913396_108_473	FSS13025	ancC	O15033	1	1	0.472
VIPR_ALG4_1008913396_108_473	FSS13025	ancC	O15040	1	1	0.458
VIPR_ALG4_1008913396_108_473	FSS13025	ancC	O15050	1	1	0.496
VIPR_ALG4_1008913396_108_473	FSS13025	ancC	O15055	1	1	0.498
VIPR_ALG4_1008913396_108_473	FSS13025	ancC	O15060	1	1	0.474
VIPR_ALG4_1008913396_108_473	FSS13025	ancC	O15072	1	1	0.438
VIPR_ALG4_1008913396_108_473	FSS13025	ancC	O15111	1	1	0.462
VIPR_ALG4_1008913396_108_473	FSS13025	ancC	O15123	1	1	0.498
VIPR_ALG4_1008913396_108_473	FSS13025	ancC	O15164	1	1	0.448
VIPR_ALG4_1008913396_108_473	FSS13025	ancC	O15169	1	1	0.472
VIPR_ALG4_1008913396_108_473	FSS13025	ancC	O15259	1	1	0.468
VIPR_ALG4_1008913396_108_473	FSS13025	ancC	O15344	1	1	0.47
VIPR_ALG4_1008913396_108_473	FSS13025	ancC	O15455	1	1	0.488
VIPR_ALG4_1008913396_108_473	FSS13025	ancC	O43149	1	1	0.474
VIPR_ALG4_1008913396_108_473	FSS13025	ancC	O43156	1	1	0.482
VIPR_ALG4_1008913396_108_473	FSS13025	ancC	O43167	1	1	0.464
VIPR_ALG4_1008913396_108_473	FSS13025	ancC	O43283	1	1	0.462
VIPR_ALG4_1008913396_108_473	FSS13025	ancC	O43314	1	1	0.488
VIPR_ALG4_1008913396_108_473	FSS13025	ancC	O43318	1	1	0.446
VIPR_ALG4_1008913396_108_473	FSS13025	ancC	O43379	1	1	0.464
VIPR_ALG4_1008913396_108_473	FSS13025	ancC	O43566	1	1	0.468
VIPR_ALG4_1008913396_108_473	FSS13025	ancC	O43683	1	1	0.47
VIPR_ALG4_1008913396_108_473	FSS13025	ancC	O43847	1	1	0.468
VIPR_ALG4_1008913396_108_473	FSS13025	ancC	O43897	1	1	0.486
VIPR_ALG4_1008913396_108_473	FSS13025	ancC	O43933	1	1	0.484
VIPR_ALG4_1008913396_108_473	FSS13025	ancC	O60229	1	1	0.476
VIPR_ALG4_1008913396_108_473	FSS13025	ancC	O60242	1	1	0.494
VIPR_ALG4_1008913396_108_473	FSS13025	ancC	O60281	1	1	0.476
VIPR_ALG4_1008913396_108_473	FSS13025	ancC	O60296	1	1	0.49
VIPR_ALG4_1008913396_108_473	FSS13025	ancC	O60309	1	1	0.496
VIPR_ALG4_1008913396_108_473	FSS13025	ancC	O60315	1	1	0.436
VIPR_ALG4_1008913396_108_473	FSS13025	ancC	O60318	1	1	0.486
VIPR_ALG4_1008913396_108_473	FSS13025	ancC	O60333	1	1	0.486
VIPR_ALG4_1008913396_108_473	FSS13025	ancC	O60336	1	1	0.494
VIPR_ALG4_1008913396_108_473	FSS13025	ancC	O60343	1	1	0.468
VIPR_ALG4_1008913396_108_473	FSS13025	ancC	O60353	1	1	0.492
VIPR_ALG4_1008913396_108_473	FSS13025	ancC	O60381	1	1	0.486
VIPR_ALG4_1008913396_108_473	FSS13025	ancC	O60449	1	1	0.448
VIPR_ALG4_1008913396_108_473	FSS13025	ancC	O60462	1	1	0.444
VIPR_ALG4_1008913396_108_473	FSS13025	ancC	O60477	1	1	0.468
VIPR_ALG4_1008913396_108_473	FSS13025	ancC	O60486	1	1	0.432
VIPR_ALG4_1008913396_108_473	FSS13025	ancC	O60494	1	1	0.464
VIPR_ALG4_1008913396_108_473	FSS13025	ancC	O60508	1	1	0.496
VIPR_ALG4_1008913396_108_473	FSS13025	ancC	O60518	1	1	0.456
VIPR_ALG4_1008913396_108_473	FSS13025	ancC	O60566	1	1	0.47
VIPR_ALG4_1008913396_108_473	FSS13025	ancC	O60573	1	1	0.48
VIPR_ALG4_1008913396_108_473	FSS13025	ancC	O60603	1	1	0.44
VIPR_ALG4_1008913396_108_473	FSS13025	ancC	O60671	1	1	0.486
VIPR_ALG4_1008913396_108_473	FSS13025	ancC	O60673	1	1	0.464
VIPR_ALG4_1008913396_108_473	FSS13025	ancC	O60674	1	1	0.458
VIPR_ALG4_1008913396_108_473	FSS13025	ancC	O60729	1	1	0.498
VIPR_ALG4_1008913396_108_473	FSS13025	ancC	O60763	1	1	0.48
VIPR_ALG4_1008913396_108_473	FSS13025	ancC	O60810	1	1	0.482
VIPR_ALG4_1008913396_108_473	FSS13025	ancC	O60813	1	1	0.482
VIPR_ALG4_1008913396_108_473	FSS13025	ancC	O60934	1	1	0.494
VIPR_ALG4_1008913396_108_473	FSS13025	ancC	O75051	1	1	0.454
VIPR_ALG4_1008913396_108_473	FSS13025	ancC	O75093	1	1	0.474
VIPR_ALG4_1008913396_108_473	FSS13025	ancC	O75132	1	1	0.486
VIPR_ALG4_1008913396_108_473	FSS13025	ancC	O75140	1	1	0.488
VIPR_ALG4_1008913396_108_473	FSS13025	ancC	O75159	1	1	0.47
VIPR_ALG4_1008913396_108_473	FSS13025	ancC	O75164	1	1	0.494
VIPR_ALG4_1008913396_108_473	FSS13025	ancC	O75182	1	1	0.496
VIPR_ALG4_1008913396_108_473	FSS13025	ancC	O75443	1	1	0.43
VIPR_ALG4_1008913396_108_473	FSS13025	ancC	O75445	1	1	0.492
VIPR_ALG4_1008913396_108_473	FSS13025	ancC	O75460	1	1	0.468
VIPR_ALG4_1008913396_108_473	FSS13025	ancC	O75509	1	1	0.492
VIPR_ALG4_1008913396_108_473	FSS13025	ancC	O75529	1	1	0.484
VIPR_ALG4_1008913396_108_473	FSS13025	ancC	O75569	1	1	0.494
VIPR_ALG4_1008913396_108_473	FSS13025	ancC	O75582	1	1	0.46
VIPR_ALG4_1008913396_108_473	FSS13025	ancC	O75592	1	1	0.452
VIPR_ALG4_1008913396_108_473	FSS13025	ancC	O75603	1	1	0.498
VIPR_ALG4_1008913396_108_473	FSS13025	ancC	O75626	1	1	0.498
VIPR_ALG4_1008913396_108_473	FSS13025	ancC	O75674	1	1	0.464
VIPR_ALG4_1008913396_108_473	FSS13025	ancC	O75717	1	1	0.472
VIPR_ALG4_1008913396_108_473	FSS13025	ancC	O75718	1	1	0.486
VIPR_ALG4_1008913396_108_473	FSS13025	ancC	O75747	1	1	0.496
VIPR_ALG4_1008913396_108_473	FSS13025	ancC	O75800	1	1	0.488
VIPR_ALG4_1008913396_108_473	FSS13025	ancC	O75815	1	1	0.496
VIPR_ALG4_1008913396_108_473	FSS13025	ancC	O75914	1	1	0.49
VIPR_ALG4_1008913396_108_473	FSS13025	ancC	O75962	1	1	0.464
VIPR_ALG4_1008913396_108_473	FSS13025	ancC	O76009	1	1	0.472
VIPR_ALG4_1008913396_108_473	FSS13025	ancC	O76011	1	1	0.45
VIPR_ALG4_1008913396_108_473	FSS13025	ancC	O76013	1	1	0.488
VIPR_ALG4_1008913396_108_473	FSS13025	ancC	O76014	1	1	0.472
VIPR_ALG4_1008913396_108_473	FSS13025	ancC	O76064	1	1	0.496
VIPR_ALG4_1008913396_108_473	FSS13025	ancC	O76074	1	1	0.492
VIPR_ALG4_1008913396_108_473	FSS13025	ancC	O94813	1	1	0.468
VIPR_ALG4_1008913396_108_473	FSS13025	ancC	O94822	1	1	0.468
VIPR_ALG4_1008913396_108_473	FSS13025	ancC	O94829	1	1	0.49
VIPR_ALG4_1008913396_108_473	FSS13025	ancC	O94830	1	1	0.47
VIPR_ALG4_1008913396_108_473	FSS13025	ancC	O94851	1	1	0.438
VIPR_ALG4_1008913396_108_473	FSS13025	ancC	O94864	1	1	0.494
VIPR_ALG4_1008913396_108_473	FSS13025	ancC	O94868	1	1	0.498
VIPR_ALG4_1008913396_108_473	FSS13025	ancC	O94880	1	1	0.462
VIPR_ALG4_1008913396_108_473	FSS13025	ancC	O94887	1	1	0.482
VIPR_ALG4_1008913396_108_473	FSS13025	ancC	O94898	1	1	0.494
VIPR_ALG4_1008913396_108_473	FSS13025	ancC	O94967	1	1	0.456
VIPR_ALG4_1008913396_108_473	FSS13025	ancC	O94972	1	1	0.442
VIPR_ALG4_1008913396_108_473	FSS13025	ancC	O94985	1	1	0.484
VIPR_ALG4_1008913396_108_473	FSS13025	ancC	O94991	1	1	0.486
VIPR_ALG4_1008913396_108_473	FSS13025	ancC	O95071	1	1	0.466
VIPR_ALG4_1008913396_108_473	FSS13025	ancC	O95163	1	1	0.468
VIPR_ALG4_1008913396_108_473	FSS13025	ancC	O95199	1	1	0.45
VIPR_ALG4_1008913396_108_473	FSS13025	ancC	O95361	1	1	0.486
VIPR_ALG4_1008913396_108_473	FSS13025	ancC	O95373	1	1	0.462
VIPR_ALG4_1008913396_108_473	FSS13025	ancC	O95405	1	1	0.432
VIPR_ALG4_1008913396_108_473	FSS13025	ancC	O95461	1	1	0.486
VIPR_ALG4_1008913396_108_473	FSS13025	ancC	O95628	1	1	0.498
VIPR_ALG4_1008913396_108_473	FSS13025	ancC	O95786	1	1	0.482
VIPR_ALG4_1008913396_108_473	FSS13025	ancC	O95789	1	1	0.448
VIPR_ALG4_1008913396_108_473	FSS13025	ancC	O95905	1	1	0.488
VIPR_ALG4_1008913396_108_473	FSS13025	ancC	O95967	1	1	0.496
VIPR_ALG4_1008913396_108_473	FSS13025	ancC	O95980	1	1	0.47
VIPR_ALG4_1008913396_108_473	FSS13025	ancC	O95985	1	1	0.482
VIPR_ALG4_1008913396_108_473	FSS13025	ancC	O96017	1	1	0.474
VIPR_ALG4_1008913396_108_473	FSS13025	ancC	P00451	1	1	0.496
VIPR_ALG4_1008913396_108_473	FSS13025	ancC	P00734	1	1	0.492
VIPR_ALG4_1008913396_108_473	FSS13025	ancC	P00736	1	1	0.492
VIPR_ALG4_1008913396_108_473	FSS13025	ancC	P00973	1	1	0.468
VIPR_ALG4_1008913396_108_473	FSS13025	ancC	P01031	1	1	0.472
VIPR_ALG4_1008913396_108_473	FSS13025	ancC	P01042	1	1	0.492
VIPR_ALG4_1008913396_108_473	FSS13025	ancC	P01106	1	1	0.456
VIPR_ALG4_1008913396_108_473	FSS13025	ancC	P01266	1	1	0.478
VIPR_ALG4_1008913396_108_473	FSS13025	ancC	P02679	1	1	0.498
VIPR_ALG4_1008913396_108_473	FSS13025	ancC	P02760	1	1	0.448
VIPR_ALG4_1008913396_108_473	FSS13025	ancC	P02786	1	1	0.49
VIPR_ALG4_1008913396_108_473	FSS13025	ancC	P03952	1	1	0.496
VIPR_ALG4_1008913396_108_473	FSS13025	ancC	P04049	1	1	0.448
VIPR_ALG4_1008913396_108_473	FSS13025	ancC	P04275	1	1	0.412
VIPR_ALG4_1008913396_108_473	FSS13025	ancC	P05156	1	1	0.484
VIPR_ALG4_1008913396_108_473	FSS13025	ancC	P05556	1	1	0.454
VIPR_ALG4_1008913396_108_473	FSS13025	ancC	P06400	1	1	0.464
VIPR_ALG4_1008913396_108_473	FSS13025	ancC	P06748	1	1	0.474
VIPR_ALG4_1008913396_108_473	FSS13025	ancC	P07225	1	1	0.468
VIPR_ALG4_1008913396_108_473	FSS13025	ancC	P07437	1	1	0.49
VIPR_ALG4_1008913396_108_473	FSS13025	ancC	P07942	1	1	0.43
VIPR_ALG4_1008913396_108_473	FSS13025	ancC	P08048	1	1	0.434
VIPR_ALG4_1008913396_108_473	FSS13025	ancC	P08138	1	1	0.492
VIPR_ALG4_1008913396_108_473	FSS13025	ancC	P08575	1	1	0.456
VIPR_ALG4_1008913396_108_473	FSS13025	ancC	P08603	1	1	0.432
VIPR_ALG4_1008913396_108_473	FSS13025	ancC	P08709	1	1	0.476
VIPR_ALG4_1008913396_108_473	FSS13025	ancC	P09848	1	1	0.498
VIPR_ALG4_1008913396_108_473	FSS13025	ancC	P09884	1	1	0.454
VIPR_ALG4_1008913396_108_473	FSS13025	ancC	P0C7M7	1	1	0.47
VIPR_ALG4_1008913396_108_473	FSS13025	ancC	P0C881	1	1	0.484
VIPR_ALG4_1008913396_108_473	FSS13025	ancC	P0CF97	1	1	0.494
VIPR_ALG4_1008913396_108_473	FSS13025	ancC	P0CG38	1	1	0.496
VIPR_ALG4_1008913396_108_473	FSS13025	ancC	P0CG47	1	1	0.488
VIPR_ALG4_1008913396_108_473	FSS13025	ancC	P0CG48	1	1	0.484
VIPR_ALG4_1008913396_108_473	FSS13025	ancC	P0DJD0	1	1	0.488
VIPR_ALG4_1008913396_108_473	FSS13025	ancC	P0DJD1	1	1	0.492
VIPR_ALG4_1008913396_108_473	FSS13025	ancC	P0DP91	1	1	0.478
VIPR_ALG4_1008913396_108_473	FSS13025	ancC	P10071	1	1	0.49
VIPR_ALG4_1008913396_108_473	FSS13025	ancC	P10398	1	1	0.452
VIPR_ALG4_1008913396_108_473	FSS13025	ancC	P10721	1	1	0.478
VIPR_ALG4_1008913396_108_473	FSS13025	ancC	P10911	1	1	0.49
VIPR_ALG4_1008913396_108_473	FSS13025	ancC	P11717	1	1	0.444
VIPR_ALG4_1008913396_108_473	FSS13025	ancC	P11926	1	1	0.49
VIPR_ALG4_1008913396_108_473	FSS13025	ancC	P13010	1	1	0.496
VIPR_ALG4_1008913396_108_473	FSS13025	ancC	P13497	1	1	0.494
VIPR_ALG4_1008913396_108_473	FSS13025	ancC	P13612	1	1	0.496
VIPR_ALG4_1008913396_108_473	FSS13025	ancC	P13671	1	1	0.474
VIPR_ALG4_1008913396_108_473	FSS13025	ancC	P13861	1	1	0.46
VIPR_ALG4_1008913396_108_473	FSS13025	ancC	P14373	1	1	0.49
VIPR_ALG4_1008913396_108_473	FSS13025	ancC	P14410	1	1	0.482
VIPR_ALG4_1008913396_108_473	FSS13025	ancC	P15056	1	1	0.464
VIPR_ALG4_1008913396_108_473	FSS13025	ancC	P15144	1	1	0.492
VIPR_ALG4_1008913396_108_473	FSS13025	ancC	P15498	1	1	0.472
VIPR_ALG4_1008913396_108_473	FSS13025	ancC	P15822	1	1	0.48
VIPR_ALG4_1008913396_108_473	FSS13025	ancC	P15918	1	1	0.494
VIPR_ALG4_1008913396_108_473	FSS13025	ancC	P16144	1	1	0.496
VIPR_ALG4_1008913396_108_473	FSS13025	ancC	P16333	1	1	0.472
VIPR_ALG4_1008913396_108_473	FSS13025	ancC	P16435	1	1	0.49
VIPR_ALG4_1008913396_108_473	FSS13025	ancC	P16499	1	1	0.494
VIPR_ALG4_1008913396_108_473	FSS13025	ancC	P17010	1	1	0.462
VIPR_ALG4_1008913396_108_473	FSS13025	ancC	P17301	1	1	0.47
VIPR_ALG4_1008913396_108_473	FSS13025	ancC	P17655	1	1	0.498
VIPR_ALG4_1008913396_108_473	FSS13025	ancC	P18084	1	1	0.466
VIPR_ALG4_1008913396_108_473	FSS13025	ancC	P18564	1	1	0.494
VIPR_ALG4_1008913396_108_473	FSS13025	ancC	P19320	1	1	0.482
VIPR_ALG4_1008913396_108_473	FSS13025	ancC	P19784	1	1	0.48
VIPR_ALG4_1008913396_108_473	FSS13025	ancC	P19823	1	1	0.494
VIPR_ALG4_1008913396_108_473	FSS13025	ancC	P20273	1	1	0.492
VIPR_ALG4_1008913396_108_473	FSS13025	ancC	P21359	1	1	0.47
VIPR_ALG4_1008913396_108_473	FSS13025	ancC	P21860	1	1	0.468
VIPR_ALG4_1008913396_108_473	FSS13025	ancC	P22681	1	1	0.462
VIPR_ALG4_1008913396_108_473	FSS13025	ancC	P22897	1	1	0.488
VIPR_ALG4_1008913396_108_473	FSS13025	ancC	P23258	1	1	0.446
VIPR_ALG4_1008913396_108_473	FSS13025	ancC	P23458	1	1	0.458
VIPR_ALG4_1008913396_108_473	FSS13025	ancC	P24043	1	1	0.422
VIPR_ALG4_1008913396_108_473	FSS13025	ancC	P24278	1	1	0.466
VIPR_ALG4_1008913396_108_473	FSS13025	ancC	P24385	1	1	0.484
VIPR_ALG4_1008913396_108_473	FSS13025	ancC	P24394	1	1	0.49
VIPR_ALG4_1008913396_108_473	FSS13025	ancC	P24864	1	1	0.498
VIPR_ALG4_1008913396_108_473	FSS13025	ancC	P25054	1	1	0.492
VIPR_ALG4_1008913396_108_473	FSS13025	ancC	P25391	1	1	0.46
VIPR_ALG4_1008913396_108_473	FSS13025	ancC	P27448	1	1	0.484
VIPR_ALG4_1008913396_108_473	FSS13025	ancC	P28161	1	1	0.496
VIPR_ALG4_1008913396_108_473	FSS13025	ancC	P28290	1	1	0.488
VIPR_ALG4_1008913396_108_473	FSS13025	ancC	P28715	1	1	0.496
VIPR_ALG4_1008913396_108_473	FSS13025	ancC	P29320	1	1	0.466
VIPR_ALG4_1008913396_108_473	FSS13025	ancC	P30260	1	1	0.472
VIPR_ALG4_1008913396_108_473	FSS13025	ancC	P30279	1	1	0.48
VIPR_ALG4_1008913396_108_473	FSS13025	ancC	P30281	1	1	0.478
VIPR_ALG4_1008913396_108_473	FSS13025	ancC	P30304	1	1	0.498
VIPR_ALG4_1008913396_108_473	FSS13025	ancC	P32418	1	1	0.486
VIPR_ALG4_1008913396_108_473	FSS13025	ancC	P33991	1	1	0.496
VIPR_ALG4_1008913396_108_473	FSS13025	ancC	P35125	1	1	0.494
VIPR_ALG4_1008913396_108_473	FSS13025	ancC	P35398	1	1	0.47
VIPR_ALG4_1008913396_108_473	FSS13025	ancC	P35443	1	1	0.464
VIPR_ALG4_1008913396_108_473	FSS13025	ancC	P35555	1	1	0.406
VIPR_ALG4_1008913396_108_473	FSS13025	ancC	P35556	1	1	0.446
VIPR_ALG4_1008913396_108_473	FSS13025	ancC	P35573	1	1	0.476
VIPR_ALG4_1008913396_108_473	FSS13025	ancC	P35606	1	1	0.496
VIPR_ALG4_1008913396_108_473	FSS13025	ancC	P35869	1	1	0.474
VIPR_ALG4_1008913396_108_473	FSS13025	ancC	P35913	1	1	0.484
VIPR_ALG4_1008913396_108_473	FSS13025	ancC	P35916	1	1	0.464
VIPR_ALG4_1008913396_108_473	FSS13025	ancC	P36888	1	1	0.48
VIPR_ALG4_1008913396_108_473	FSS13025	ancC	P37275	1	1	0.49
VIPR_ALG4_1008913396_108_473	FSS13025	ancC	P38398	1	1	0.45
VIPR_ALG4_1008913396_108_473	FSS13025	ancC	P40189	1	1	0.396
VIPR_ALG4_1008913396_108_473	FSS13025	ancC	P40763	1	1	0.468
VIPR_ALG4_1008913396_108_473	FSS13025	ancC	P41182	1	1	0.464
VIPR_ALG4_1008913396_108_473	FSS13025	ancC	P41743	1	1	0.446
VIPR_ALG4_1008913396_108_473	FSS13025	ancC	P42336	1	1	0.49
VIPR_ALG4_1008913396_108_473	FSS13025	ancC	P42702	1	1	0.48
VIPR_ALG4_1008913396_108_473	FSS13025	ancC	P42858	1	1	0.48
VIPR_ALG4_1008913396_108_473	FSS13025	ancC	P43354	1	1	0.482
VIPR_ALG4_1008913396_108_473	FSS13025	ancC	P45974	1	1	0.492
VIPR_ALG4_1008913396_108_473	FSS13025	ancC	P46020	1	1	0.498
VIPR_ALG4_1008913396_108_473	FSS13025	ancC	P46531	1	1	0.488
VIPR_ALG4_1008913396_108_473	FSS13025	ancC	P46934	1	1	0.424
VIPR_ALG4_1008913396_108_473	FSS13025	ancC	P47989	1	1	0.448
VIPR_ALG4_1008913396_108_473	FSS13025	ancC	P48551	1	1	0.492
VIPR_ALG4_1008913396_108_473	FSS13025	ancC	P48552	1	1	0.492
VIPR_ALG4_1008913396_108_473	FSS13025	ancC	P48553	1	1	0.46
VIPR_ALG4_1008913396_108_473	FSS13025	ancC	P48736	1	1	0.496
VIPR_ALG4_1008913396_108_473	FSS13025	ancC	P48740	1	1	0.456
VIPR_ALG4_1008913396_108_473	FSS13025	ancC	P49023	1	1	0.464
VIPR_ALG4_1008913396_108_473	FSS13025	ancC	P49116	1	1	0.48
VIPR_ALG4_1008913396_108_473	FSS13025	ancC	P49619	1	1	0.492
VIPR_ALG4_1008913396_108_473	FSS13025	ancC	P49758	1	1	0.472
VIPR_ALG4_1008913396_108_473	FSS13025	ancC	P49767	1	1	0.49
VIPR_ALG4_1008913396_108_473	FSS13025	ancC	P49792	1	1	0.458
VIPR_ALG4_1008913396_108_473	FSS13025	ancC	P49917	1	1	0.494
VIPR_ALG4_1008913396_108_473	FSS13025	ancC	P50542	1	1	0.492
VIPR_ALG4_1008913396_108_473	FSS13025	ancC	P50747	1	1	0.484
VIPR_ALG4_1008913396_108_473	FSS13025	ancC	P50748	1	1	0.478
VIPR_ALG4_1008913396_108_473	FSS13025	ancC	P51512	1	1	0.492
VIPR_ALG4_1008913396_108_473	FSS13025	ancC	P51654	1	1	0.482
VIPR_ALG4_1008913396_108_473	FSS13025	ancC	P51784	1	1	0.45
VIPR_ALG4_1008913396_108_473	FSS13025	ancC	P51841	1	1	0.46
VIPR_ALG4_1008913396_108_473	FSS13025	ancC	P51956	1	1	0.484
VIPR_ALG4_1008913396_108_473	FSS13025	ancC	P51957	1	1	0.478
VIPR_ALG4_1008913396_108_473	FSS13025	ancC	P52294	1	1	0.432
VIPR_ALG4_1008913396_108_473	FSS13025	ancC	P52735	1	1	0.496
VIPR_ALG4_1008913396_108_473	FSS13025	ancC	P52746	1	1	0.47
VIPR_ALG4_1008913396_108_473	FSS13025	ancC	P53355	1	1	0.498
VIPR_ALG4_1008913396_108_473	FSS13025	ancC	P53582	1	1	0.478
VIPR_ALG4_1008913396_108_473	FSS13025	ancC	P53667	1	1	0.49
VIPR_ALG4_1008913396_108_473	FSS13025	ancC	P53671	1	1	0.498
VIPR_ALG4_1008913396_108_473	FSS13025	ancC	P53779	1	1	0.49
VIPR_ALG4_1008913396_108_473	FSS13025	ancC	P54098	1	1	0.47
VIPR_ALG4_1008913396_108_473	FSS13025	ancC	P54132	1	1	0.462
VIPR_ALG4_1008913396_108_473	FSS13025	ancC	P54198	1	1	0.474
VIPR_ALG4_1008913396_108_473	FSS13025	ancC	P54278	1	1	0.488
VIPR_ALG4_1008913396_108_473	FSS13025	ancC	P54756	1	1	0.452
VIPR_ALG4_1008913396_108_473	FSS13025	ancC	P54762	1	1	0.472
VIPR_ALG4_1008913396_108_473	FSS13025	ancC	P55201	1	1	0.466
VIPR_ALG4_1008913396_108_473	FSS13025	ancC	P55209	1	1	0.498
VIPR_ALG4_1008913396_108_473	FSS13025	ancC	P55265	1	1	0.476
VIPR_ALG4_1008913396_108_473	FSS13025	ancC	P55854	1	1	0.488
VIPR_ALG4_1008913396_108_473	FSS13025	ancC	P56199	1	1	0.41
VIPR_ALG4_1008913396_108_473	FSS13025	ancC	P56645	1	1	0.492
VIPR_ALG4_1008913396_108_473	FSS13025	ancC	P56715	1	1	0.48
VIPR_ALG4_1008913396_108_473	FSS13025	ancC	P58397	1	1	0.462
VIPR_ALG4_1008913396_108_473	FSS13025	ancC	P59046	1	1	0.488
VIPR_ALG4_1008913396_108_473	FSS13025	ancC	P59510	1	1	0.432
VIPR_ALG4_1008913396_108_473	FSS13025	ancC	P61565	1	1	0.494
VIPR_ALG4_1008913396_108_473	FSS13025	ancC	P61758	1	1	0.484
VIPR_ALG4_1008913396_108_473	FSS13025	ancC	P61956	1	1	0.498
VIPR_ALG4_1008913396_108_473	FSS13025	ancC	P68371	1	1	0.492
VIPR_ALG4_1008913396_108_473	FSS13025	ancC	P68400	1	1	0.45
VIPR_ALG4_1008913396_108_473	FSS13025	ancC	P68543	1	1	0.498
VIPR_ALG4_1008913396_108_473	FSS13025	ancC	P78312	1	1	0.498
VIPR_ALG4_1008913396_108_473	FSS13025	ancC	P78317	1	1	0.494
VIPR_ALG4_1008913396_108_473	FSS13025	ancC	P78509	1	1	0.416
VIPR_ALG4_1008913396_108_473	FSS13025	ancC	P78527	1	1	0.458
VIPR_ALG4_1008913396_108_473	FSS13025	ancC	P78536	1	1	0.468
VIPR_ALG4_1008913396_108_473	FSS13025	ancC	P78562	1	1	0.452
VIPR_ALG4_1008913396_108_473	FSS13025	ancC	P82279	1	1	0.452
VIPR_ALG4_1008913396_108_473	FSS13025	ancC	P82987	1	1	0.424
VIPR_ALG4_1008913396_108_473	FSS13025	ancC	P86452	1	1	0.47
VIPR_ALG4_1008913396_108_473	FSS13025	ancC	P98073	1	1	0.46
VIPR_ALG4_1008913396_108_473	FSS13025	ancC	P98155	1	1	0.456
VIPR_ALG4_1008913396_108_473	FSS13025	ancC	P98164	1	1	0.394
VIPR_ALG4_1008913396_108_473	FSS13025	ancC	Q00013	1	1	0.496
VIPR_ALG4_1008913396_108_473	FSS13025	ancC	Q00532	1	1	0.476
VIPR_ALG4_1008913396_108_473	FSS13025	ancC	Q00534	1	1	0.484
VIPR_ALG4_1008913396_108_473	FSS13025	ancC	Q00537	1	1	0.494
VIPR_ALG4_1008913396_108_473	FSS13025	ancC	Q01638	1	1	0.496
VIPR_ALG4_1008913396_108_473	FSS13025	ancC	Q01954	1	1	0.498
VIPR_ALG4_1008913396_108_473	FSS13025	ancC	Q02509	1	1	0.476
VIPR_ALG4_1008913396_108_473	FSS13025	ancC	Q02763	1	1	0.496
VIPR_ALG4_1008913396_108_473	FSS13025	ancC	Q03112	1	1	0.486
VIPR_ALG4_1008913396_108_473	FSS13025	ancC	Q03591	1	1	0.484
VIPR_ALG4_1008913396_108_473	FSS13025	ancC	Q03933	1	1	0.472
VIPR_ALG4_1008913396_108_473	FSS13025	ancC	Q04446	1	1	0.486
VIPR_ALG4_1008913396_108_473	FSS13025	ancC	Q04721	1	1	0.454
VIPR_ALG4_1008913396_108_473	FSS13025	ancC	Q04725	1	1	0.454
VIPR_ALG4_1008913396_108_473	FSS13025	ancC	Q04726	1	1	0.466
VIPR_ALG4_1008913396_108_473	FSS13025	ancC	Q04759	1	1	0.486
VIPR_ALG4_1008913396_108_473	FSS13025	ancC	Q05086	1	1	0.37
VIPR_ALG4_1008913396_108_473	FSS13025	ancC	Q05397	1	1	0.472
VIPR_ALG4_1008913396_108_473	FSS13025	ancC	Q05655	1	1	0.484
VIPR_ALG4_1008913396_108_473	FSS13025	ancC	Q06190	1	1	0.436
VIPR_ALG4_1008913396_108_473	FSS13025	ancC	Q06203	1	1	0.492
VIPR_ALG4_1008913396_108_473	FSS13025	ancC	Q06889	1	1	0.478
VIPR_ALG4_1008913396_108_473	FSS13025	ancC	Q07002	1	1	0.48
VIPR_ALG4_1008913396_108_473	FSS13025	ancC	Q07075	1	1	0.49
VIPR_ALG4_1008913396_108_473	FSS13025	ancC	Q07864	1	1	0.476
VIPR_ALG4_1008913396_108_473	FSS13025	ancC	Q08493	1	1	0.476
VIPR_ALG4_1008913396_108_473	FSS13025	ancC	Q08554	1	1	0.472
VIPR_ALG4_1008913396_108_473	FSS13025	ancC	Q08945	1	1	0.494
VIPR_ALG4_1008913396_108_473	FSS13025	ancC	Q08AE8	1	1	0.488
VIPR_ALG4_1008913396_108_473	FSS13025	ancC	Q09161	1	1	0.46
VIPR_ALG4_1008913396_108_473	FSS13025	ancC	Q09472	1	1	0.444
VIPR_ALG4_1008913396_108_473	FSS13025	ancC	Q09MP3	1	1	0.498
VIPR_ALG4_1008913396_108_473	FSS13025	ancC	Q0VDD8	1	1	0.494
VIPR_ALG4_1008913396_108_473	FSS13025	ancC	Q10472	1	1	0.486
VIPR_ALG4_1008913396_108_473	FSS13025	ancC	Q12766	1	1	0.48
VIPR_ALG4_1008913396_108_473	FSS13025	ancC	Q12769	1	1	0.478
VIPR_ALG4_1008913396_108_473	FSS13025	ancC	Q12772	1	1	0.496
VIPR_ALG4_1008913396_108_473	FSS13025	ancC	Q12797	1	1	0.494
VIPR_ALG4_1008913396_108_473	FSS13025	ancC	Q12800	1	1	0.496
VIPR_ALG4_1008913396_108_473	FSS13025	ancC	Q12824	1	1	0.42
VIPR_ALG4_1008913396_108_473	FSS13025	ancC	Q12841	1	1	0.464
VIPR_ALG4_1008913396_108_473	FSS13025	ancC	Q12874	1	1	0.454
VIPR_ALG4_1008913396_108_473	FSS13025	ancC	Q12879	1	1	0.488
VIPR_ALG4_1008913396_108_473	FSS13025	ancC	Q12888	1	1	0.47
VIPR_ALG4_1008913396_108_473	FSS13025	ancC	Q12929	1	1	0.49
VIPR_ALG4_1008913396_108_473	FSS13025	ancC	Q12933	1	1	0.408
VIPR_ALG4_1008913396_108_473	FSS13025	ancC	Q12986	1	1	0.468
VIPR_ALG4_1008913396_108_473	FSS13025	ancC	Q13018	1	1	0.448
VIPR_ALG4_1008913396_108_473	FSS13025	ancC	Q13043	1	1	0.468
VIPR_ALG4_1008913396_108_473	FSS13025	ancC	Q13045	1	1	0.46
VIPR_ALG4_1008913396_108_473	FSS13025	ancC	Q13107	1	1	0.466
VIPR_ALG4_1008913396_108_473	FSS13025	ancC	Q13129	1	1	0.468
VIPR_ALG4_1008913396_108_473	FSS13025	ancC	Q13131	1	1	0.472
VIPR_ALG4_1008913396_108_473	FSS13025	ancC	Q13137	1	1	0.484
VIPR_ALG4_1008913396_108_473	FSS13025	ancC	Q13153	1	1	0.486
VIPR_ALG4_1008913396_108_473	FSS13025	ancC	Q13188	1	1	0.488
VIPR_ALG4_1008913396_108_473	FSS13025	ancC	Q13201	1	1	0.484
VIPR_ALG4_1008913396_108_473	FSS13025	ancC	Q13219	1	1	0.426
VIPR_ALG4_1008913396_108_473	FSS13025	ancC	Q13224	1	1	0.478
VIPR_ALG4_1008913396_108_473	FSS13025	ancC	Q13315	1	1	0.49
VIPR_ALG4_1008913396_108_473	FSS13025	ancC	Q13325	1	1	0.492
VIPR_ALG4_1008913396_108_473	FSS13025	ancC	Q13393	1	1	0.488
VIPR_ALG4_1008913396_108_473	FSS13025	ancC	Q13402	1	1	0.472
VIPR_ALG4_1008913396_108_473	FSS13025	ancC	Q13489	1	1	0.456
VIPR_ALG4_1008913396_108_473	FSS13025	ancC	Q13490	1	1	0.492
VIPR_ALG4_1008913396_108_473	FSS13025	ancC	Q13535	1	1	0.484
VIPR_ALG4_1008913396_108_473	FSS13025	ancC	Q13555	1	1	0.47
VIPR_ALG4_1008913396_108_473	FSS13025	ancC	Q13557	1	1	0.498
VIPR_ALG4_1008913396_108_473	FSS13025	ancC	Q13563	1	1	0.482
VIPR_ALG4_1008913396_108_473	FSS13025	ancC	Q13614	1	1	0.496
VIPR_ALG4_1008913396_108_473	FSS13025	ancC	Q13615	1	1	0.448
VIPR_ALG4_1008913396_108_473	FSS13025	ancC	Q13617	1	1	0.46
VIPR_ALG4_1008913396_108_473	FSS13025	ancC	Q13625	1	1	0.484
VIPR_ALG4_1008913396_108_473	FSS13025	ancC	Q13651	1	1	0.456
VIPR_ALG4_1008913396_108_473	FSS13025	ancC	Q13751	1	1	0.464
VIPR_ALG4_1008913396_108_473	FSS13025	ancC	Q13769	1	1	0.472
VIPR_ALG4_1008913396_108_473	FSS13025	ancC	Q13772	1	1	0.434
VIPR_ALG4_1008913396_108_473	FSS13025	ancC	Q13822	1	1	0.48
VIPR_ALG4_1008913396_108_473	FSS13025	ancC	Q13838	1	1	0.492
VIPR_ALG4_1008913396_108_473	FSS13025	ancC	Q13888	1	1	0.484
VIPR_ALG4_1008913396_108_473	FSS13025	ancC	Q13946	1	1	0.486
VIPR_ALG4_1008913396_108_473	FSS13025	ancC	Q13972	1	1	0.456
VIPR_ALG4_1008913396_108_473	FSS13025	ancC	Q14112	1	1	0.482
VIPR_ALG4_1008913396_108_473	FSS13025	ancC	Q14114	1	1	0.464
VIPR_ALG4_1008913396_108_473	FSS13025	ancC	Q14155	1	1	0.486
VIPR_ALG4_1008913396_108_473	FSS13025	ancC	Q14161	1	1	0.486
VIPR_ALG4_1008913396_108_473	FSS13025	ancC	Q14166	1	1	0.496
VIPR_ALG4_1008913396_108_473	FSS13025	ancC	Q14181	1	1	0.488
VIPR_ALG4_1008913396_108_473	FSS13025	ancC	Q14191	1	1	0.468
VIPR_ALG4_1008913396_108_473	FSS13025	ancC	Q14202	1	1	0.488
VIPR_ALG4_1008913396_108_473	FSS13025	ancC	Q14207	1	1	0.478
VIPR_ALG4_1008913396_108_473	FSS13025	ancC	Q14289	1	1	0.478
VIPR_ALG4_1008913396_108_473	FSS13025	ancC	Q14432	1	1	0.496
VIPR_ALG4_1008913396_108_473	FSS13025	ancC	Q14457	1	1	0.44
VIPR_ALG4_1008913396_108_473	FSS13025	ancC	Q14525	1	1	0.462
VIPR_ALG4_1008913396_108_473	FSS13025	ancC	Q14533	1	1	0.498
VIPR_ALG4_1008913396_108_473	FSS13025	ancC	Q14571	1	1	0.49
VIPR_ALG4_1008913396_108_473	FSS13025	ancC	Q14596	1	1	0.484
VIPR_ALG4_1008913396_108_473	FSS13025	ancC	Q14643	1	1	0.466
VIPR_ALG4_1008913396_108_473	FSS13025	ancC	Q14644	1	1	0.47
VIPR_ALG4_1008913396_108_473	FSS13025	ancC	Q14653	1	1	0.472
VIPR_ALG4_1008913396_108_473	FSS13025	ancC	Q14669	1	1	0.484
VIPR_ALG4_1008913396_108_473	FSS13025	ancC	Q14678	1	1	0.48
VIPR_ALG4_1008913396_108_473	FSS13025	ancC	Q14680	1	1	0.45
VIPR_ALG4_1008913396_108_473	FSS13025	ancC	Q14767	1	1	0.446
VIPR_ALG4_1008913396_108_473	FSS13025	ancC	Q14790	1	1	0.472
VIPR_ALG4_1008913396_108_473	FSS13025	ancC	Q14831	1	1	0.486
VIPR_ALG4_1008913396_108_473	FSS13025	ancC	Q14865	1	1	0.488
VIPR_ALG4_1008913396_108_473	FSS13025	ancC	Q14872	1	1	0.496
VIPR_ALG4_1008913396_108_473	FSS13025	ancC	Q14995	1	1	0.492
VIPR_ALG4_1008913396_108_473	FSS13025	ancC	Q149N8	1	1	0.46
VIPR_ALG4_1008913396_108_473	FSS13025	ancC	Q14CZ7	1	1	0.494
VIPR_ALG4_1008913396_108_473	FSS13025	ancC	Q15029	1	1	0.466
VIPR_ALG4_1008913396_108_473	FSS13025	ancC	Q15154	1	1	0.486
VIPR_ALG4_1008913396_108_473	FSS13025	ancC	Q15283	1	1	0.492
VIPR_ALG4_1008913396_108_473	FSS13025	ancC	Q15303	1	1	0.468
VIPR_ALG4_1008913396_108_473	FSS13025	ancC	Q15323	1	1	0.464
VIPR_ALG4_1008913396_108_473	FSS13025	ancC	Q15326	1	1	0.464
VIPR_ALG4_1008913396_108_473	FSS13025	ancC	Q15437	1	1	0.498
VIPR_ALG4_1008913396_108_473	FSS13025	ancC	Q15468	1	1	0.462
VIPR_ALG4_1008913396_108_473	FSS13025	ancC	Q15652	1	1	0.462
VIPR_ALG4_1008913396_108_473	FSS13025	ancC	Q15746	1	1	0.494
VIPR_ALG4_1008913396_108_473	FSS13025	ancC	Q15751	1	1	0.448
VIPR_ALG4_1008913396_108_473	FSS13025	ancC	Q15788	1	1	0.46
VIPR_ALG4_1008913396_108_473	FSS13025	ancC	Q15797	1	1	0.496
VIPR_ALG4_1008913396_108_473	FSS13025	ancC	Q15911	1	1	0.462
VIPR_ALG4_1008913396_108_473	FSS13025	ancC	Q16342	1	1	0.472
VIPR_ALG4_1008913396_108_473	FSS13025	ancC	Q16363	1	1	0.486
VIPR_ALG4_1008913396_108_473	FSS13025	ancC	Q16531	1	1	0.374
VIPR_ALG4_1008913396_108_473	FSS13025	ancC	Q16706	1	1	0.486
VIPR_ALG4_1008913396_108_473	FSS13025	ancC	Q16760	1	1	0.47
VIPR_ALG4_1008913396_108_473	FSS13025	ancC	Q16787	1	1	0.444
VIPR_ALG4_1008913396_108_473	FSS13025	ancC	Q16821	1	1	0.49
VIPR_ALG4_1008913396_108_473	FSS13025	ancC	Q17R60	1	1	0.484
VIPR_ALG4_1008913396_108_473	FSS13025	ancC	Q2M1K9	1	1	0.458
VIPR_ALG4_1008913396_108_473	FSS13025	ancC	Q2M243	1	1	0.492
VIPR_ALG4_1008913396_108_473	FSS13025	ancC	Q2M389	1	1	0.488
VIPR_ALG4_1008913396_108_473	FSS13025	ancC	Q2M3C7	1	1	0.48
VIPR_ALG4_1008913396_108_473	FSS13025	ancC	Q2NKQ1	1	1	0.466
VIPR_ALG4_1008913396_108_473	FSS13025	ancC	Q2NKX8	1	1	0.496
VIPR_ALG4_1008913396_108_473	FSS13025	ancC	Q33E94	1	1	0.478
VIPR_ALG4_1008913396_108_473	FSS13025	ancC	Q3B7T1	1	1	0.482
VIPR_ALG4_1008913396_108_473	FSS13025	ancC	Q3MJ16	1	1	0.496
VIPR_ALG4_1008913396_108_473	FSS13025	ancC	Q3T906	1	1	0.476
VIPR_ALG4_1008913396_108_473	FSS13025	ancC	Q3YBR2	1	1	0.498
VIPR_ALG4_1008913396_108_473	FSS13025	ancC	Q3ZCN5	1	1	0.436
VIPR_ALG4_1008913396_108_473	FSS13025	ancC	Q49AG3	1	1	0.432
VIPR_ALG4_1008913396_108_473	FSS13025	ancC	Q49AJ0	1	1	0.46
VIPR_ALG4_1008913396_108_473	FSS13025	ancC	Q49AR2	1	1	0.45
VIPR_ALG4_1008913396_108_473	FSS13025	ancC	Q4ADV7	1	1	0.482
VIPR_ALG4_1008913396_108_473	FSS13025	ancC	Q4FZB7	1	1	0.47
VIPR_ALG4_1008913396_108_473	FSS13025	ancC	Q4G0A6	1	1	0.468
VIPR_ALG4_1008913396_108_473	FSS13025	ancC	Q4KWH8	1	1	0.436
VIPR_ALG4_1008913396_108_473	FSS13025	ancC	Q4LDE5	1	1	0.414
VIPR_ALG4_1008913396_108_473	FSS13025	ancC	Q52LR7	1	1	0.482
VIPR_ALG4_1008913396_108_473	FSS13025	ancC	Q52LW3	1	1	0.482
VIPR_ALG4_1008913396_108_473	FSS13025	ancC	Q53H47	1	1	0.492
VIPR_ALG4_1008913396_108_473	FSS13025	ancC	Q53TQ3	1	1	0.466
VIPR_ALG4_1008913396_108_473	FSS13025	ancC	Q56UN5	1	1	0.486
VIPR_ALG4_1008913396_108_473	FSS13025	ancC	Q587J7	1	1	0.464
VIPR_ALG4_1008913396_108_473	FSS13025	ancC	Q59H18	1	1	0.498
VIPR_ALG4_1008913396_108_473	FSS13025	ancC	Q5CZC0	1	1	0.488
VIPR_ALG4_1008913396_108_473	FSS13025	ancC	Q5DID0	1	1	0.484
VIPR_ALG4_1008913396_108_473	FSS13025	ancC	Q5H9J9	1	1	0.468
VIPR_ALG4_1008913396_108_473	FSS13025	ancC	Q5H9R7	1	1	0.472
VIPR_ALG4_1008913396_108_473	FSS13025	ancC	Q5H9S7	1	1	0.47
VIPR_ALG4_1008913396_108_473	FSS13025	ancC	Q5HYM0	1	1	0.484
VIPR_ALG4_1008913396_108_473	FSS13025	ancC	Q5JR59	1	1	0.492
VIPR_ALG4_1008913396_108_473	FSS13025	ancC	Q5JRX3	1	1	0.496
VIPR_ALG4_1008913396_108_473	FSS13025	ancC	Q5JSZ5	1	1	0.49
VIPR_ALG4_1008913396_108_473	FSS13025	ancC	Q5JXC2	1	1	0.498
VIPR_ALG4_1008913396_108_473	FSS13025	ancC	Q5K651	1	1	0.468
VIPR_ALG4_1008913396_108_473	FSS13025	ancC	Q5MJ70	1	1	0.492
VIPR_ALG4_1008913396_108_473	FSS13025	ancC	Q5QP82	1	1	0.492
VIPR_ALG4_1008913396_108_473	FSS13025	ancC	Q5R3F8	1	1	0.496
VIPR_ALG4_1008913396_108_473	FSS13025	ancC	Q5S007	1	1	0.472
VIPR_ALG4_1008913396_108_473	FSS13025	ancC	Q5SVZ6	1	1	0.438
VIPR_ALG4_1008913396_108_473	FSS13025	ancC	Q5SWA1	1	1	0.482
VIPR_ALG4_1008913396_108_473	FSS13025	ancC	Q5T1A1	1	1	0.498
VIPR_ALG4_1008913396_108_473	FSS13025	ancC	Q5T1H1	1	1	0.41
VIPR_ALG4_1008913396_108_473	FSS13025	ancC	Q5T1M5	1	1	0.498
VIPR_ALG4_1008913396_108_473	FSS13025	ancC	Q5T1N1	1	1	0.466
VIPR_ALG4_1008913396_108_473	FSS13025	ancC	Q5T1V6	1	1	0.492
VIPR_ALG4_1008913396_108_473	FSS13025	ancC	Q5T2Q4	1	1	0.464
VIPR_ALG4_1008913396_108_473	FSS13025	ancC	Q5T4S7	1	1	0.46
VIPR_ALG4_1008913396_108_473	FSS13025	ancC	Q5T4T6	1	1	0.498
VIPR_ALG4_1008913396_108_473	FSS13025	ancC	Q5T5C0	1	1	0.488
VIPR_ALG4_1008913396_108_473	FSS13025	ancC	Q5T5X7	1	1	0.472
VIPR_ALG4_1008913396_108_473	FSS13025	ancC	Q5T6S3	1	1	0.484
VIPR_ALG4_1008913396_108_473	FSS13025	ancC	Q5T7B8	1	1	0.45
VIPR_ALG4_1008913396_108_473	FSS13025	ancC	Q5T7M9	1	1	0.492
VIPR_ALG4_1008913396_108_473	FSS13025	ancC	Q5T7W7	1	1	0.494
VIPR_ALG4_1008913396_108_473	FSS13025	ancC	Q5TAQ9	1	1	0.464
VIPR_ALG4_1008913396_108_473	FSS13025	ancC	Q5TB30	1	1	0.468
VIPR_ALG4_1008913396_108_473	FSS13025	ancC	Q5TH69	1	1	0.47
VIPR_ALG4_1008913396_108_473	FSS13025	ancC	Q5THK1	1	1	0.46
VIPR_ALG4_1008913396_108_473	FSS13025	ancC	Q5THR3	1	1	0.492
VIPR_ALG4_1008913396_108_473	FSS13025	ancC	Q5TYX0	1	1	0.46
VIPR_ALG4_1008913396_108_473	FSS13025	ancC	Q5U5Z8	1	1	0.494
VIPR_ALG4_1008913396_108_473	FSS13025	ancC	Q5U623	1	1	0.49
VIPR_ALG4_1008913396_108_473	FSS13025	ancC	Q5VT25	1	1	0.47
VIPR_ALG4_1008913396_108_473	FSS13025	ancC	Q5VT97	1	1	0.48
VIPR_ALG4_1008913396_108_473	FSS13025	ancC	Q5VTB9	1	1	0.492
VIPR_ALG4_1008913396_108_473	FSS13025	ancC	Q5VU97	1	1	0.45
VIPR_ALG4_1008913396_108_473	FSS13025	ancC	Q5VUG0	1	1	0.476
VIPR_ALG4_1008913396_108_473	FSS13025	ancC	Q5VUJ5	1	1	0.462
VIPR_ALG4_1008913396_108_473	FSS13025	ancC	Q5VW22	1	1	0.478
VIPR_ALG4_1008913396_108_473	FSS13025	ancC	Q5VWM4	1	1	0.472
VIPR_ALG4_1008913396_108_473	FSS13025	ancC	Q5VWM5	1	1	0.47
VIPR_ALG4_1008913396_108_473	FSS13025	ancC	Q5VWN6	1	1	0.492
VIPR_ALG4_1008913396_108_473	FSS13025	ancC	Q5VX71	1	1	0.478
VIPR_ALG4_1008913396_108_473	FSS13025	ancC	Q5VXH4	1	1	0.476
VIPR_ALG4_1008913396_108_473	FSS13025	ancC	Q5VXH5	1	1	0.472
VIPR_ALG4_1008913396_108_473	FSS13025	ancC	Q5VXU9	1	1	0.464
VIPR_ALG4_1008913396_108_473	FSS13025	ancC	Q5VYJ5	1	1	0.464
VIPR_ALG4_1008913396_108_473	FSS13025	ancC	Q5VZL5	1	1	0.494
VIPR_ALG4_1008913396_108_473	FSS13025	ancC	Q5W0Q7	1	1	0.452
VIPR_ALG4_1008913396_108_473	FSS13025	ancC	Q5W0V3	1	1	0.492
VIPR_ALG4_1008913396_108_473	FSS13025	ancC	Q63HK5	1	1	0.49
VIPR_ALG4_1008913396_108_473	FSS13025	ancC	Q63HN8	1	1	0.47
VIPR_ALG4_1008913396_108_473	FSS13025	ancC	Q63HQ2	1	1	0.478
VIPR_ALG4_1008913396_108_473	FSS13025	ancC	Q659A1	1	1	0.494
VIPR_ALG4_1008913396_108_473	FSS13025	ancC	Q68BL8	1	1	0.492
VIPR_ALG4_1008913396_108_473	FSS13025	ancC	Q68CZ6	1	1	0.496
VIPR_ALG4_1008913396_108_473	FSS13025	ancC	Q68D51	1	1	0.472
VIPR_ALG4_1008913396_108_473	FSS13025	ancC	Q68DK2	1	1	0.46
VIPR_ALG4_1008913396_108_473	FSS13025	ancC	Q68DQ2	1	1	0.47
VIPR_ALG4_1008913396_108_473	FSS13025	ancC	Q68DX3	1	1	0.494
VIPR_ALG4_1008913396_108_473	FSS13025	ancC	Q69YH5	1	1	0.488
VIPR_ALG4_1008913396_108_473	FSS13025	ancC	Q6AHZ1	1	1	0.498
VIPR_ALG4_1008913396_108_473	FSS13025	ancC	Q6AI39	1	1	0.486
VIPR_ALG4_1008913396_108_473	FSS13025	ancC	Q6DHV5	1	1	0.434
VIPR_ALG4_1008913396_108_473	FSS13025	ancC	Q6DHV7	1	1	0.49
VIPR_ALG4_1008913396_108_473	FSS13025	ancC	Q6EKJ0	1	1	0.498
VIPR_ALG4_1008913396_108_473	FSS13025	ancC	Q6EMB2	1	1	0.498
VIPR_ALG4_1008913396_108_473	FSS13025	ancC	Q6IBW4	1	1	0.492
VIPR_ALG4_1008913396_108_473	FSS13025	ancC	Q6IE36	1	1	0.498
VIPR_ALG4_1008913396_108_473	FSS13025	ancC	Q6IE37	1	1	0.47
VIPR_ALG4_1008913396_108_473	FSS13025	ancC	Q6IE81	1	1	0.464
VIPR_ALG4_1008913396_108_473	FSS13025	ancC	Q6IQ26	1	1	0.478
VIPR_ALG4_1008913396_108_473	FSS13025	ancC	Q6IQ55	1	1	0.494
VIPR_ALG4_1008913396_108_473	FSS13025	ancC	Q6KC79	1	1	0.498
VIPR_ALG4_1008913396_108_473	FSS13025	ancC	Q6L9W6	1	1	0.49
VIPR_ALG4_1008913396_108_473	FSS13025	ancC	Q6MZZ7	1	1	0.472
VIPR_ALG4_1008913396_108_473	FSS13025	ancC	Q6N021	1	1	0.436
VIPR_ALG4_1008913396_108_473	FSS13025	ancC	Q6N022	1	1	0.45
VIPR_ALG4_1008913396_108_473	FSS13025	ancC	Q6NSI8	1	1	0.458
VIPR_ALG4_1008913396_108_473	FSS13025	ancC	Q6NUM6	1	1	0.494
VIPR_ALG4_1008913396_108_473	FSS13025	ancC	Q6NZY4	1	1	0.494
VIPR_ALG4_1008913396_108_473	FSS13025	ancC	Q6P1K8	1	1	0.484
VIPR_ALG4_1008913396_108_473	FSS13025	ancC	Q6P1X5	1	1	0.498
VIPR_ALG4_1008913396_108_473	FSS13025	ancC	Q6P2E9	1	1	0.494
VIPR_ALG4_1008913396_108_473	FSS13025	ancC	Q6P2H3	1	1	0.482
VIPR_ALG4_1008913396_108_473	FSS13025	ancC	Q6PCD5	1	1	0.48
VIPR_ALG4_1008913396_108_473	FSS13025	ancC	Q6PIU1	1	1	0.466
VIPR_ALG4_1008913396_108_473	FSS13025	ancC	Q6PJI9	1	1	0.448
VIPR_ALG4_1008913396_108_473	FSS13025	ancC	Q6PJW8	1	1	0.482
VIPR_ALG4_1008913396_108_473	FSS13025	ancC	Q6PKC3	1	1	0.486
VIPR_ALG4_1008913396_108_473	FSS13025	ancC	Q6Q0C0	1	1	0.488
VIPR_ALG4_1008913396_108_473	FSS13025	ancC	Q6Q4G3	1	1	0.494
VIPR_ALG4_1008913396_108_473	FSS13025	ancC	Q6R2W3	1	1	0.468
VIPR_ALG4_1008913396_108_473	FSS13025	ancC	Q6R327	1	1	0.466
VIPR_ALG4_1008913396_108_473	FSS13025	ancC	Q6RI45	1	1	0.48
VIPR_ALG4_1008913396_108_473	FSS13025	ancC	Q6UW02	1	1	0.48
VIPR_ALG4_1008913396_108_473	FSS13025	ancC	Q6UWE0	1	1	0.484
VIPR_ALG4_1008913396_108_473	FSS13025	ancC	Q6UWL2	1	1	0.498
VIPR_ALG4_1008913396_108_473	FSS13025	ancC	Q6UX41	1	1	0.498
VIPR_ALG4_1008913396_108_473	FSS13025	ancC	Q6UXB0	1	1	0.494
VIPR_ALG4_1008913396_108_473	FSS13025	ancC	Q6UXG2	1	1	0.46
VIPR_ALG4_1008913396_108_473	FSS13025	ancC	Q6UXH9	1	1	0.498
VIPR_ALG4_1008913396_108_473	FSS13025	ancC	Q6UXK5	1	1	0.47
VIPR_ALG4_1008913396_108_473	FSS13025	ancC	Q6UXM1	1	1	0.444
VIPR_ALG4_1008913396_108_473	FSS13025	ancC	Q6UXV0	1	1	0.478
VIPR_ALG4_1008913396_108_473	FSS13025	ancC	Q6UY01	1	1	0.494
VIPR_ALG4_1008913396_108_473	FSS13025	ancC	Q6UY14	1	1	0.478
VIPR_ALG4_1008913396_108_473	FSS13025	ancC	Q6V0I7	1	1	0.468
VIPR_ALG4_1008913396_108_473	FSS13025	ancC	Q6V1X1	1	1	0.474
VIPR_ALG4_1008913396_108_473	FSS13025	ancC	Q6VMQ6	1	1	0.462
VIPR_ALG4_1008913396_108_473	FSS13025	ancC	Q6W2J9	1	1	0.494
VIPR_ALG4_1008913396_108_473	FSS13025	ancC	Q6XYQ8	1	1	0.492
VIPR_ALG4_1008913396_108_473	FSS13025	ancC	Q6ZMT9	1	1	0.496
VIPR_ALG4_1008913396_108_473	FSS13025	ancC	Q6ZMV9	1	1	0.492
VIPR_ALG4_1008913396_108_473	FSS13025	ancC	Q6ZMZ0	1	1	0.492
VIPR_ALG4_1008913396_108_473	FSS13025	ancC	Q6ZN28	1	1	0.476
VIPR_ALG4_1008913396_108_473	FSS13025	ancC	Q6ZNA4	1	1	0.48
VIPR_ALG4_1008913396_108_473	FSS13025	ancC	Q6ZNE5	1	1	0.48
VIPR_ALG4_1008913396_108_473	FSS13025	ancC	Q6ZP01	1	1	0.484
VIPR_ALG4_1008913396_108_473	FSS13025	ancC	Q6ZR08	1	1	0.494
VIPR_ALG4_1008913396_108_473	FSS13025	ancC	Q6ZRH7	1	1	0.49
VIPR_ALG4_1008913396_108_473	FSS13025	ancC	Q6ZRI0	1	1	0.454
VIPR_ALG4_1008913396_108_473	FSS13025	ancC	Q6ZRR7	1	1	0.454
VIPR_ALG4_1008913396_108_473	FSS13025	ancC	Q6ZRS4	1	1	0.476
VIPR_ALG4_1008913396_108_473	FSS13025	ancC	Q6ZSB9	1	1	0.478
VIPR_ALG4_1008913396_108_473	FSS13025	ancC	Q6ZT12	1	1	0.472
VIPR_ALG4_1008913396_108_473	FSS13025	ancC	Q6ZUI0	1	1	0.494
VIPR_ALG4_1008913396_108_473	FSS13025	ancC	Q6ZUJ8	1	1	0.476
VIPR_ALG4_1008913396_108_473	FSS13025	ancC	Q6ZV73	1	1	0.48
VIPR_ALG4_1008913396_108_473	FSS13025	ancC	Q6ZVD8	1	1	0.462
VIPR_ALG4_1008913396_108_473	FSS13025	ancC	Q6ZVF9	1	1	0.474
VIPR_ALG4_1008913396_108_473	FSS13025	ancC	Q6ZVT6	1	1	0.45
VIPR_ALG4_1008913396_108_473	FSS13025	ancC	Q6ZW61	1	1	0.472
VIPR_ALG4_1008913396_108_473	FSS13025	ancC	Q6ZWE6	1	1	0.464
VIPR_ALG4_1008913396_108_473	FSS13025	ancC	Q6ZWH5	1	1	0.48
VIPR_ALG4_1008913396_108_473	FSS13025	ancC	Q709C8	1	1	0.498
VIPR_ALG4_1008913396_108_473	FSS13025	ancC	Q70CQ2	1	1	0.462
VIPR_ALG4_1008913396_108_473	FSS13025	ancC	Q70EK8	1	1	0.466
VIPR_ALG4_1008913396_108_473	FSS13025	ancC	Q70EL1	1	1	0.456
VIPR_ALG4_1008913396_108_473	FSS13025	ancC	Q71RC2	1	1	0.49
VIPR_ALG4_1008913396_108_473	FSS13025	ancC	Q76B58	1	1	0.462
VIPR_ALG4_1008913396_108_473	FSS13025	ancC	Q76L83	1	1	0.486
VIPR_ALG4_1008913396_108_473	FSS13025	ancC	Q76N89	1	1	0.48
VIPR_ALG4_1008913396_108_473	FSS13025	ancC	Q7L1W4	1	1	0.486
VIPR_ALG4_1008913396_108_473	FSS13025	ancC	Q7L2H7	1	1	0.494
VIPR_ALG4_1008913396_108_473	FSS13025	ancC	Q7L576	1	1	0.474
VIPR_ALG4_1008913396_108_473	FSS13025	ancC	Q7L5Y1	1	1	0.472
VIPR_ALG4_1008913396_108_473	FSS13025	ancC	Q7L622	1	1	0.492
VIPR_ALG4_1008913396_108_473	FSS13025	ancC	Q7L7V1	1	1	0.492
VIPR_ALG4_1008913396_108_473	FSS13025	ancC	Q7L7X3	1	1	0.486
VIPR_ALG4_1008913396_108_473	FSS13025	ancC	Q7L8L6	1	1	0.49
VIPR_ALG4_1008913396_108_473	FSS13025	ancC	Q7LFX5	1	1	0.498
VIPR_ALG4_1008913396_108_473	FSS13025	ancC	Q7LGA3	1	1	0.498
VIPR_ALG4_1008913396_108_473	FSS13025	ancC	Q7RTR0	1	1	0.468
VIPR_ALG4_1008913396_108_473	FSS13025	ancC	Q7RTY8	1	1	0.45
VIPR_ALG4_1008913396_108_473	FSS13025	ancC	Q7Z2W4	1	1	0.474
VIPR_ALG4_1008913396_108_473	FSS13025	ancC	Q7Z2Y5	1	1	0.49
VIPR_ALG4_1008913396_108_473	FSS13025	ancC	Q7Z2Y8	1	1	0.454
VIPR_ALG4_1008913396_108_473	FSS13025	ancC	Q7Z333	1	1	0.492
VIPR_ALG4_1008913396_108_473	FSS13025	ancC	Q7Z353	1	1	0.418
VIPR_ALG4_1008913396_108_473	FSS13025	ancC	Q7Z392	1	1	0.432
VIPR_ALG4_1008913396_108_473	FSS13025	ancC	Q7Z3E5	1	1	0.49
VIPR_ALG4_1008913396_108_473	FSS13025	ancC	Q7Z3G6	1	1	0.486
VIPR_ALG4_1008913396_108_473	FSS13025	ancC	Q7Z3J3	1	1	0.492
VIPR_ALG4_1008913396_108_473	FSS13025	ancC	Q7Z3K3	1	1	0.466
VIPR_ALG4_1008913396_108_473	FSS13025	ancC	Q7Z3V4	1	1	0.464
VIPR_ALG4_1008913396_108_473	FSS13025	ancC	Q7Z3Z4	1	1	0.46
VIPR_ALG4_1008913396_108_473	FSS13025	ancC	Q7Z407	1	1	0.454
VIPR_ALG4_1008913396_108_473	FSS13025	ancC	Q7Z408	1	1	0.474
VIPR_ALG4_1008913396_108_473	FSS13025	ancC	Q7Z494	1	1	0.486
VIPR_ALG4_1008913396_108_473	FSS13025	ancC	Q7Z4H7	1	1	0.49
VIPR_ALG4_1008913396_108_473	FSS13025	ancC	Q7Z4V0	1	1	0.488
VIPR_ALG4_1008913396_108_473	FSS13025	ancC	Q7Z591	1	1	0.498
VIPR_ALG4_1008913396_108_473	FSS13025	ancC	Q7Z5K2	1	1	0.482
VIPR_ALG4_1008913396_108_473	FSS13025	ancC	Q7Z6G8	1	1	0.466
VIPR_ALG4_1008913396_108_473	FSS13025	ancC	Q7Z6K1	1	1	0.492
VIPR_ALG4_1008913396_108_473	FSS13025	ancC	Q7Z6K3	1	1	0.494
VIPR_ALG4_1008913396_108_473	FSS13025	ancC	Q7Z6Z7	1	1	0.474
VIPR_ALG4_1008913396_108_473	FSS13025	ancC	Q7Z745	1	1	0.49
VIPR_ALG4_1008913396_108_473	FSS13025	ancC	Q7Z7G8	1	1	0.464
VIPR_ALG4_1008913396_108_473	FSS13025	ancC	Q7Z7L1	1	1	0.464
VIPR_ALG4_1008913396_108_473	FSS13025	ancC	Q7Z7L7	1	1	0.498
VIPR_ALG4_1008913396_108_473	FSS13025	ancC	Q86SE9	1	1	0.494
VIPR_ALG4_1008913396_108_473	FSS13025	ancC	Q86SP6	1	1	0.498
VIPR_ALG4_1008913396_108_473	FSS13025	ancC	Q86SQ4	1	1	0.498
VIPR_ALG4_1008913396_108_473	FSS13025	ancC	Q86SS6	1	1	0.466
VIPR_ALG4_1008913396_108_473	FSS13025	ancC	Q86T96	1	1	0.45
VIPR_ALG4_1008913396_108_473	FSS13025	ancC	Q86TB3	1	1	0.476
VIPR_ALG4_1008913396_108_473	FSS13025	ancC	Q86TI0	1	1	0.464
VIPR_ALG4_1008913396_108_473	FSS13025	ancC	Q86TI2	1	1	0.472
VIPR_ALG4_1008913396_108_473	FSS13025	ancC	Q86UA1	1	1	0.498
VIPR_ALG4_1008913396_108_473	FSS13025	ancC	Q86UQ4	1	1	0.498
VIPR_ALG4_1008913396_108_473	FSS13025	ancC	Q86UW6	1	1	0.498
VIPR_ALG4_1008913396_108_473	FSS13025	ancC	Q86UW7	1	1	0.466
VIPR_ALG4_1008913396_108_473	FSS13025	ancC	Q86VD1	1	1	0.488
VIPR_ALG4_1008913396_108_473	FSS13025	ancC	Q86VH5	1	1	0.482
VIPR_ALG4_1008913396_108_473	FSS13025	ancC	Q86VV8	1	1	0.478
VIPR_ALG4_1008913396_108_473	FSS13025	ancC	Q86W24	1	1	0.488
VIPR_ALG4_1008913396_108_473	FSS13025	ancC	Q86W56	1	1	0.466
VIPR_ALG4_1008913396_108_473	FSS13025	ancC	Q86WG5	1	1	0.472
VIPR_ALG4_1008913396_108_473	FSS13025	ancC	Q86WI1	1	1	0.46
VIPR_ALG4_1008913396_108_473	FSS13025	ancC	Q86WI3	1	1	0.494
VIPR_ALG4_1008913396_108_473	FSS13025	ancC	Q86WT1	1	1	0.46
VIPR_ALG4_1008913396_108_473	FSS13025	ancC	Q86XD8	1	1	0.49
VIPR_ALG4_1008913396_108_473	FSS13025	ancC	Q86XI2	1	1	0.474
VIPR_ALG4_1008913396_108_473	FSS13025	ancC	Q86XX4	1	1	0.456
VIPR_ALG4_1008913396_108_473	FSS13025	ancC	Q86Y13	1	1	0.47
VIPR_ALG4_1008913396_108_473	FSS13025	ancC	Q86YA3	1	1	0.492
VIPR_ALG4_1008913396_108_473	FSS13025	ancC	Q86YC2	1	1	0.48
VIPR_ALG4_1008913396_108_473	FSS13025	ancC	Q86YR7	1	1	0.48
VIPR_ALG4_1008913396_108_473	FSS13025	ancC	Q86YS3	1	1	0.476
VIPR_ALG4_1008913396_108_473	FSS13025	ancC	Q86YV5	1	1	0.488
VIPR_ALG4_1008913396_108_473	FSS13025	ancC	Q86YW9	1	1	0.484
VIPR_ALG4_1008913396_108_473	FSS13025	ancC	Q8IUQ4	1	1	0.446
VIPR_ALG4_1008913396_108_473	FSS13025	ancC	Q8IV33	1	1	0.496
VIPR_ALG4_1008913396_108_473	FSS13025	ancC	Q8IV76	1	1	0.422
VIPR_ALG4_1008913396_108_473	FSS13025	ancC	Q8IVE3	1	1	0.494
VIPR_ALG4_1008913396_108_473	FSS13025	ancC	Q8IVF5	1	1	0.462
VIPR_ALG4_1008913396_108_473	FSS13025	ancC	Q8IVT5	1	1	0.486
VIPR_ALG4_1008913396_108_473	FSS13025	ancC	Q8IVU3	1	1	0.484
VIPR_ALG4_1008913396_108_473	FSS13025	ancC	Q8IW35	1	1	0.494
VIPR_ALG4_1008913396_108_473	FSS13025	ancC	Q8IWA0	1	1	0.472
VIPR_ALG4_1008913396_108_473	FSS13025	ancC	Q8IWA4	1	1	0.476
VIPR_ALG4_1008913396_108_473	FSS13025	ancC	Q8IWB1	1	1	0.49
VIPR_ALG4_1008913396_108_473	FSS13025	ancC	Q8IWB9	1	1	0.494
VIPR_ALG4_1008913396_108_473	FSS13025	ancC	Q8IWG1	1	1	0.436
VIPR_ALG4_1008913396_108_473	FSS13025	ancC	Q8IWR0	1	1	0.482
VIPR_ALG4_1008913396_108_473	FSS13025	ancC	Q8IWT3	1	1	0.442
VIPR_ALG4_1008913396_108_473	FSS13025	ancC	Q8IWT6	1	1	0.48
VIPR_ALG4_1008913396_108_473	FSS13025	ancC	Q8IWU2	1	1	0.492
VIPR_ALG4_1008913396_108_473	FSS13025	ancC	Q8IWV7	1	1	0.452
VIPR_ALG4_1008913396_108_473	FSS13025	ancC	Q8IWV8	1	1	0.43
VIPR_ALG4_1008913396_108_473	FSS13025	ancC	Q8IWZ3	1	1	0.484
VIPR_ALG4_1008913396_108_473	FSS13025	ancC	Q8IWZ5	1	1	0.45
VIPR_ALG4_1008913396_108_473	FSS13025	ancC	Q8IX90	1	1	0.49
VIPR_ALG4_1008913396_108_473	FSS13025	ancC	Q8IXH7	1	1	0.494
VIPR_ALG4_1008913396_108_473	FSS13025	ancC	Q8IXJ9	1	1	0.496
VIPR_ALG4_1008913396_108_473	FSS13025	ancC	Q8IXT1	1	1	0.49
VIPR_ALG4_1008913396_108_473	FSS13025	ancC	Q8IXW5	1	1	0.49
VIPR_ALG4_1008913396_108_473	FSS13025	ancC	Q8IY47	1	1	0.462
VIPR_ALG4_1008913396_108_473	FSS13025	ancC	Q8IYA6	1	1	0.488
VIPR_ALG4_1008913396_108_473	FSS13025	ancC	Q8IYD8	1	1	0.452
VIPR_ALG4_1008913396_108_473	FSS13025	ancC	Q8IYF3	1	1	0.49
VIPR_ALG4_1008913396_108_473	FSS13025	ancC	Q8IYH5	1	1	0.466
VIPR_ALG4_1008913396_108_473	FSS13025	ancC	Q8IYM0	1	1	0.488
VIPR_ALG4_1008913396_108_473	FSS13025	ancC	Q8IYQ7	1	1	0.46
VIPR_ALG4_1008913396_108_473	FSS13025	ancC	Q8IYR2	1	1	0.49
VIPR_ALG4_1008913396_108_473	FSS13025	ancC	Q8IYS4	1	1	0.498
VIPR_ALG4_1008913396_108_473	FSS13025	ancC	Q8IYT2	1	1	0.466
VIPR_ALG4_1008913396_108_473	FSS13025	ancC	Q8IYT8	1	1	0.472
VIPR_ALG4_1008913396_108_473	FSS13025	ancC	Q8IYU2	1	1	0.472
VIPR_ALG4_1008913396_108_473	FSS13025	ancC	Q8IYY4	1	1	0.488
VIPR_ALG4_1008913396_108_473	FSS13025	ancC	Q8IZE3	1	1	0.498
VIPR_ALG4_1008913396_108_473	FSS13025	ancC	Q8IZH2	1	1	0.472
VIPR_ALG4_1008913396_108_473	FSS13025	ancC	Q8IZK6	1	1	0.464
VIPR_ALG4_1008913396_108_473	FSS13025	ancC	Q8IZM8	1	1	0.474
VIPR_ALG4_1008913396_108_473	FSS13025	ancC	Q8IZS8	1	1	0.458
VIPR_ALG4_1008913396_108_473	FSS13025	ancC	Q8N0U7	1	1	0.496
VIPR_ALG4_1008913396_108_473	FSS13025	ancC	Q8N157	1	1	0.492
VIPR_ALG4_1008913396_108_473	FSS13025	ancC	Q8N1H7	1	1	0.49
VIPR_ALG4_1008913396_108_473	FSS13025	ancC	Q8N1I0	1	1	0.49
VIPR_ALG4_1008913396_108_473	FSS13025	ancC	Q8N1W1	1	1	0.472
VIPR_ALG4_1008913396_108_473	FSS13025	ancC	Q8N2E2	1	1	0.456
VIPR_ALG4_1008913396_108_473	FSS13025	ancC	Q8N302	1	1	0.498
VIPR_ALG4_1008913396_108_473	FSS13025	ancC	Q8N328	1	1	0.494
VIPR_ALG4_1008913396_108_473	FSS13025	ancC	Q8N344	1	1	0.478
VIPR_ALG4_1008913396_108_473	FSS13025	ancC	Q8N3C0	1	1	0.494
VIPR_ALG4_1008913396_108_473	FSS13025	ancC	Q8N3E9	1	1	0.462
VIPR_ALG4_1008913396_108_473	FSS13025	ancC	Q8N3T1	1	1	0.494
VIPR_ALG4_1008913396_108_473	FSS13025	ancC	Q8N427	1	1	0.49
VIPR_ALG4_1008913396_108_473	FSS13025	ancC	Q8N448	1	1	0.466
VIPR_ALG4_1008913396_108_473	FSS13025	ancC	Q8N4B4	1	1	0.47
VIPR_ALG4_1008913396_108_473	FSS13025	ancC	Q8N4C8	1	1	0.492
VIPR_ALG4_1008913396_108_473	FSS13025	ancC	Q8N4P2	1	1	0.478
VIPR_ALG4_1008913396_108_473	FSS13025	ancC	Q8N4X5	1	1	0.498
VIPR_ALG4_1008913396_108_473	FSS13025	ancC	Q8N5U6	1	1	0.472
VIPR_ALG4_1008913396_108_473	FSS13025	ancC	Q8N608	1	1	0.472
VIPR_ALG4_1008913396_108_473	FSS13025	ancC	Q8N6G6	1	1	0.474
VIPR_ALG4_1008913396_108_473	FSS13025	ancC	Q8N6Q8	1	1	0.474
VIPR_ALG4_1008913396_108_473	FSS13025	ancC	Q8N7E2	1	1	0.474
VIPR_ALG4_1008913396_108_473	FSS13025	ancC	Q8N806	1	1	0.474
VIPR_ALG4_1008913396_108_473	FSS13025	ancC	Q8N841	1	1	0.458
VIPR_ALG4_1008913396_108_473	FSS13025	ancC	Q8N8K9	1	1	0.464
VIPR_ALG4_1008913396_108_473	FSS13025	ancC	Q8N8U9	1	1	0.486
VIPR_ALG4_1008913396_108_473	FSS13025	ancC	Q8N960	1	1	0.478
VIPR_ALG4_1008913396_108_473	FSS13025	ancC	Q8N9V2	1	1	0.46
VIPR_ALG4_1008913396_108_473	FSS13025	ancC	Q8N9V7	1	1	0.434
VIPR_ALG4_1008913396_108_473	FSS13025	ancC	Q8NA31	1	1	0.476
VIPR_ALG4_1008913396_108_473	FSS13025	ancC	Q8NA54	1	1	0.462
VIPR_ALG4_1008913396_108_473	FSS13025	ancC	Q8NA82	1	1	0.49
VIPR_ALG4_1008913396_108_473	FSS13025	ancC	Q8NAB2	1	1	0.462
VIPR_ALG4_1008913396_108_473	FSS13025	ancC	Q8NAX2	1	1	0.498
VIPR_ALG4_1008913396_108_473	FSS13025	ancC	Q8NB14	1	1	0.484
VIPR_ALG4_1008913396_108_473	FSS13025	ancC	Q8NCD3	1	1	0.496
VIPR_ALG4_1008913396_108_473	FSS13025	ancC	Q8NCN2	1	1	0.494
VIPR_ALG4_1008913396_108_473	FSS13025	ancC	Q8NCN5	1	1	0.494
VIPR_ALG4_1008913396_108_473	FSS13025	ancC	Q8ND24	1	1	0.484
VIPR_ALG4_1008913396_108_473	FSS13025	ancC	Q8NDM7	1	1	0.458
VIPR_ALG4_1008913396_108_473	FSS13025	ancC	Q8NE09	1	1	0.488
VIPR_ALG4_1008913396_108_473	FSS13025	ancC	Q8NE31	1	1	0.496
VIPR_ALG4_1008913396_108_473	FSS13025	ancC	Q8NEA9	1	1	0.462
VIPR_ALG4_1008913396_108_473	FSS13025	ancC	Q8NEB7	1	1	0.488
VIPR_ALG4_1008913396_108_473	FSS13025	ancC	Q8NEE6	1	1	0.448
VIPR_ALG4_1008913396_108_473	FSS13025	ancC	Q8NEN0	1	1	0.49
VIPR_ALG4_1008913396_108_473	FSS13025	ancC	Q8NEU8	1	1	0.49
VIPR_ALG4_1008913396_108_473	FSS13025	ancC	Q8NEV1	1	1	0.47
VIPR_ALG4_1008913396_108_473	FSS13025	ancC	Q8NEZ4	1	1	0.438
VIPR_ALG4_1008913396_108_473	FSS13025	ancC	Q8NFA0	1	1	0.472
VIPR_ALG4_1008913396_108_473	FSS13025	ancC	Q8NFP9	1	1	0.47
VIPR_ALG4_1008913396_108_473	FSS13025	ancC	Q8NFT8	1	1	0.444
VIPR_ALG4_1008913396_108_473	FSS13025	ancC	Q8NFU7	1	1	0.428
VIPR_ALG4_1008913396_108_473	FSS13025	ancC	Q8NFY9	1	1	0.484
VIPR_ALG4_1008913396_108_473	FSS13025	ancC	Q8NG31	1	1	0.498
VIPR_ALG4_1008913396_108_473	FSS13025	ancC	Q8NG66	1	1	0.476
VIPR_ALG4_1008913396_108_473	FSS13025	ancC	Q8NHM5	1	1	0.498
VIPR_ALG4_1008913396_108_473	FSS13025	ancC	Q8NHP7	1	1	0.492
VIPR_ALG4_1008913396_108_473	FSS13025	ancC	Q8NHQ1	1	1	0.492
VIPR_ALG4_1008913396_108_473	FSS13025	ancC	Q8NHY2	1	1	0.472
VIPR_ALG4_1008913396_108_473	FSS13025	ancC	Q8NI17	1	1	0.492
VIPR_ALG4_1008913396_108_473	FSS13025	ancC	Q8TAG9	1	1	0.492
VIPR_ALG4_1008913396_108_473	FSS13025	ancC	Q8TAM2	1	1	0.492
VIPR_ALG4_1008913396_108_473	FSS13025	ancC	Q8TAT5	1	1	0.482
VIPR_ALG4_1008913396_108_473	FSS13025	ancC	Q8TAT6	1	1	0.49
VIPR_ALG4_1008913396_108_473	FSS13025	ancC	Q8TB52	1	1	0.452
VIPR_ALG4_1008913396_108_473	FSS13025	ancC	Q8TBP0	1	1	0.482
VIPR_ALG4_1008913396_108_473	FSS13025	ancC	Q8TBY9	1	1	0.488
VIPR_ALG4_1008913396_108_473	FSS13025	ancC	Q8TC07	1	1	0.47
VIPR_ALG4_1008913396_108_473	FSS13025	ancC	Q8TC27	1	1	0.466
VIPR_ALG4_1008913396_108_473	FSS13025	ancC	Q8TCG1	1	1	0.474
VIPR_ALG4_1008913396_108_473	FSS13025	ancC	Q8TD17	1	1	0.494
VIPR_ALG4_1008913396_108_473	FSS13025	ancC	Q8TDD5	1	1	0.492
VIPR_ALG4_1008913396_108_473	FSS13025	ancC	Q8TDF6	1	1	0.486
VIPR_ALG4_1008913396_108_473	FSS13025	ancC	Q8TDJ6	1	1	0.456
VIPR_ALG4_1008913396_108_473	FSS13025	ancC	Q8TDN2	1	1	0.486
VIPR_ALG4_1008913396_108_473	FSS13025	ancC	Q8TDW7	1	1	0.492
VIPR_ALG4_1008913396_108_473	FSS13025	ancC	Q8TDX9	1	1	0.486
VIPR_ALG4_1008913396_108_473	FSS13025	ancC	Q8TE12	1	1	0.496
VIPR_ALG4_1008913396_108_473	FSS13025	ancC	Q8TE73	1	1	0.498
VIPR_ALG4_1008913396_108_473	FSS13025	ancC	Q8TE85	1	1	0.478
VIPR_ALG4_1008913396_108_473	FSS13025	ancC	Q8TEB1	1	1	0.48
VIPR_ALG4_1008913396_108_473	FSS13025	ancC	Q8TEP8	1	1	0.468
VIPR_ALG4_1008913396_108_473	FSS13025	ancC	Q8TEQ0	1	1	0.496
VIPR_ALG4_1008913396_108_473	FSS13025	ancC	Q8TEQ6	1	1	0.482
VIPR_ALG4_1008913396_108_473	FSS13025	ancC	Q8TEY7	1	1	0.466
VIPR_ALG4_1008913396_108_473	FSS13025	ancC	Q8TF05	1	1	0.494
VIPR_ALG4_1008913396_108_473	FSS13025	ancC	Q8TF40	1	1	0.444
VIPR_ALG4_1008913396_108_473	FSS13025	ancC	Q8TF46	1	1	0.488
VIPR_ALG4_1008913396_108_473	FSS13025	ancC	Q8WTT2	1	1	0.486
VIPR_ALG4_1008913396_108_473	FSS13025	ancC	Q8WTW4	1	1	0.482
VIPR_ALG4_1008913396_108_473	FSS13025	ancC	Q8WUJ3	1	1	0.486
VIPR_ALG4_1008913396_108_473	FSS13025	ancC	Q8WUM0	1	1	0.454
VIPR_ALG4_1008913396_108_473	FSS13025	ancC	Q8WW38	1	1	0.472
VIPR_ALG4_1008913396_108_473	FSS13025	ancC	Q8WWQ0	1	1	0.49
VIPR_ALG4_1008913396_108_473	FSS13025	ancC	Q8WWQ8	1	1	0.44
VIPR_ALG4_1008913396_108_473	FSS13025	ancC	Q8WWU5	1	1	0.484
VIPR_ALG4_1008913396_108_473	FSS13025	ancC	Q8WWY8	1	1	0.49
VIPR_ALG4_1008913396_108_473	FSS13025	ancC	Q8WXD5	1	1	0.494
VIPR_ALG4_1008913396_108_473	FSS13025	ancC	Q8WXE9	1	1	0.468
VIPR_ALG4_1008913396_108_473	FSS13025	ancC	Q8WXG6	1	1	0.48
VIPR_ALG4_1008913396_108_473	FSS13025	ancC	Q8WXH5	1	1	0.486
VIPR_ALG4_1008913396_108_473	FSS13025	ancC	Q8WY21	1	1	0.474
VIPR_ALG4_1008913396_108_473	FSS13025	ancC	Q8WY54	1	1	0.486
VIPR_ALG4_1008913396_108_473	FSS13025	ancC	Q8WYP5	1	1	0.496
VIPR_ALG4_1008913396_108_473	FSS13025	ancC	Q8WZ74	1	1	0.476
VIPR_ALG4_1008913396_108_473	FSS13025	ancC	Q92502	1	1	0.472
VIPR_ALG4_1008913396_108_473	FSS13025	ancC	Q92538	1	1	0.482
VIPR_ALG4_1008913396_108_473	FSS13025	ancC	Q92539	1	1	0.496
VIPR_ALG4_1008913396_108_473	FSS13025	ancC	Q92556	1	1	0.496
VIPR_ALG4_1008913396_108_473	FSS13025	ancC	Q92563	1	1	0.48
VIPR_ALG4_1008913396_108_473	FSS13025	ancC	Q92565	1	1	0.472
VIPR_ALG4_1008913396_108_473	FSS13025	ancC	Q92574	1	1	0.488
VIPR_ALG4_1008913396_108_473	FSS13025	ancC	Q92585	1	1	0.462
VIPR_ALG4_1008913396_108_473	FSS13025	ancC	Q92609	1	1	0.498
VIPR_ALG4_1008913396_108_473	FSS13025	ancC	Q92626	1	1	0.468
VIPR_ALG4_1008913396_108_473	FSS13025	ancC	Q92636	1	1	0.478
VIPR_ALG4_1008913396_108_473	FSS13025	ancC	Q92681	1	1	0.462
VIPR_ALG4_1008913396_108_473	FSS13025	ancC	Q92747	1	1	0.494
VIPR_ALG4_1008913396_108_473	FSS13025	ancC	Q92752	1	1	0.476
VIPR_ALG4_1008913396_108_473	FSS13025	ancC	Q92764	1	1	0.492
VIPR_ALG4_1008913396_108_473	FSS13025	ancC	Q92766	1	1	0.476
VIPR_ALG4_1008913396_108_473	FSS13025	ancC	Q92769	1	1	0.486
VIPR_ALG4_1008913396_108_473	FSS13025	ancC	Q92786	1	1	0.48
VIPR_ALG4_1008913396_108_473	FSS13025	ancC	Q92793	1	1	0.44
VIPR_ALG4_1008913396_108_473	FSS13025	ancC	Q92794	1	1	0.448
VIPR_ALG4_1008913396_108_473	FSS13025	ancC	Q92828	1	1	0.486
VIPR_ALG4_1008913396_108_473	FSS13025	ancC	Q92833	1	1	0.476
VIPR_ALG4_1008913396_108_473	FSS13025	ancC	Q92834	1	1	0.49
VIPR_ALG4_1008913396_108_473	FSS13025	ancC	Q92845	1	1	0.452
VIPR_ALG4_1008913396_108_473	FSS13025	ancC	Q92851	1	1	0.496
VIPR_ALG4_1008913396_108_473	FSS13025	ancC	Q92854	1	1	0.464
VIPR_ALG4_1008913396_108_473	FSS13025	ancC	Q92859	1	1	0.498
VIPR_ALG4_1008913396_108_473	FSS13025	ancC	Q92870	1	1	0.478
VIPR_ALG4_1008913396_108_473	FSS13025	ancC	Q92896	1	1	0.466
VIPR_ALG4_1008913396_108_473	FSS13025	ancC	Q92973	1	1	0.44
VIPR_ALG4_1008913396_108_473	FSS13025	ancC	Q92993	1	1	0.456
VIPR_ALG4_1008913396_108_473	FSS13025	ancC	Q92995	1	1	0.492
VIPR_ALG4_1008913396_108_473	FSS13025	ancC	Q93008	1	1	0.446
VIPR_ALG4_1008913396_108_473	FSS13025	ancC	Q93009	1	1	0.286
VIPR_ALG4_1008913396_108_473	FSS13025	ancC	Q93034	1	1	0.374
VIPR_ALG4_1008913396_108_473	FSS13025	ancC	Q93050	1	1	0.48
VIPR_ALG4_1008913396_108_473	FSS13025	ancC	Q93073	1	1	0.458
VIPR_ALG4_1008913396_108_473	FSS13025	ancC	Q969F9	1	1	0.494
VIPR_ALG4_1008913396_108_473	FSS13025	ancC	Q969H0	1	1	0.47
VIPR_ALG4_1008913396_108_473	FSS13025	ancC	Q969Q6	1	1	0.476
VIPR_ALG4_1008913396_108_473	FSS13025	ancC	Q96A70	1	1	0.47
VIPR_ALG4_1008913396_108_473	FSS13025	ancC	Q96AC1	1	1	0.49
VIPR_ALG4_1008913396_108_473	FSS13025	ancC	Q96AE7	1	1	0.472
VIPR_ALG4_1008913396_108_473	FSS13025	ancC	Q96B97	1	1	0.488
VIPR_ALG4_1008913396_108_473	FSS13025	ancC	Q96BR9	1	1	0.49
VIPR_ALG4_1008913396_108_473	FSS13025	ancC	Q96BS2	1	1	0.494
VIPR_ALG4_1008913396_108_473	FSS13025	ancC	Q96BY6	1	1	0.492
VIPR_ALG4_1008913396_108_473	FSS13025	ancC	Q96CW9	1	1	0.496
VIPR_ALG4_1008913396_108_473	FSS13025	ancC	Q96DM1	1	1	0.494
VIPR_ALG4_1008913396_108_473	FSS13025	ancC	Q96EP0	1	1	0.486
VIPR_ALG4_1008913396_108_473	FSS13025	ancC	Q96EP1	1	1	0.47
VIPR_ALG4_1008913396_108_473	FSS13025	ancC	Q96ER3	1	1	0.464
VIPR_ALG4_1008913396_108_473	FSS13025	ancC	Q96EY7	1	1	0.492
VIPR_ALG4_1008913396_108_473	FSS13025	ancC	Q96F81	1	1	0.49
VIPR_ALG4_1008913396_108_473	FSS13025	ancC	Q96FV9	1	1	0.488
VIPR_ALG4_1008913396_108_473	FSS13025	ancC	Q96G75	1	1	0.474
VIPR_ALG4_1008913396_108_473	FSS13025	ancC	Q96HA7	1	1	0.444
VIPR_ALG4_1008913396_108_473	FSS13025	ancC	Q96HI0	1	1	0.484
VIPR_ALG4_1008913396_108_473	FSS13025	ancC	Q96HW7	1	1	0.492
VIPR_ALG4_1008913396_108_473	FSS13025	ancC	Q96HY7	1	1	0.468
VIPR_ALG4_1008913396_108_473	FSS13025	ancC	Q96I76	1	1	0.496
VIPR_ALG4_1008913396_108_473	FSS13025	ancC	Q96IK5	1	1	0.466
VIPR_ALG4_1008913396_108_473	FSS13025	ancC	Q96JA1	1	1	0.498
VIPR_ALG4_1008913396_108_473	FSS13025	ancC	Q96JB1	1	1	0.476
VIPR_ALG4_1008913396_108_473	FSS13025	ancC	Q96JB3	1	1	0.468
VIPR_ALG4_1008913396_108_473	FSS13025	ancC	Q96JI7	1	1	0.46
VIPR_ALG4_1008913396_108_473	FSS13025	ancC	Q96JM2	1	1	0.47
VIPR_ALG4_1008913396_108_473	FSS13025	ancC	Q96JM7	1	1	0.446
VIPR_ALG4_1008913396_108_473	FSS13025	ancC	Q96JS3	1	1	0.464
VIPR_ALG4_1008913396_108_473	FSS13025	ancC	Q96K76	1	1	0.482
VIPR_ALG4_1008913396_108_473	FSS13025	ancC	Q96K83	1	1	0.428
VIPR_ALG4_1008913396_108_473	FSS13025	ancC	Q96KN3	1	1	0.492
VIPR_ALG4_1008913396_108_473	FSS13025	ancC	Q96KP1	1	1	0.46
VIPR_ALG4_1008913396_108_473	FSS13025	ancC	Q96KQ4	1	1	0.49
VIPR_ALG4_1008913396_108_473	FSS13025	ancC	Q96KR4	1	1	0.492
VIPR_ALG4_1008913396_108_473	FSS13025	ancC	Q96LI5	1	1	0.464
VIPR_ALG4_1008913396_108_473	FSS13025	ancC	Q96LK0	1	1	0.492
VIPR_ALG4_1008913396_108_473	FSS13025	ancC	Q96LU7	1	1	0.46
VIPR_ALG4_1008913396_108_473	FSS13025	ancC	Q96M93	1	1	0.486
VIPR_ALG4_1008913396_108_473	FSS13025	ancC	Q96MH7	1	1	0.434
VIPR_ALG4_1008913396_108_473	FSS13025	ancC	Q96MI9	1	1	0.478
VIPR_ALG4_1008913396_108_473	FSS13025	ancC	Q96MM7	1	1	0.492
VIPR_ALG4_1008913396_108_473	FSS13025	ancC	Q96MN2	1	1	0.498
VIPR_ALG4_1008913396_108_473	FSS13025	ancC	Q96MP5	1	1	0.486
VIPR_ALG4_1008913396_108_473	FSS13025	ancC	Q96MT3	1	1	0.452
VIPR_ALG4_1008913396_108_473	FSS13025	ancC	Q96MT8	1	1	0.492
VIPR_ALG4_1008913396_108_473	FSS13025	ancC	Q96MY7	1	1	0.482
VIPR_ALG4_1008913396_108_473	FSS13025	ancC	Q96NL0	1	1	0.484
VIPR_ALG4_1008913396_108_473	FSS13025	ancC	Q96NW4	1	1	0.48
VIPR_ALG4_1008913396_108_473	FSS13025	ancC	Q96NW7	1	1	0.498
VIPR_ALG4_1008913396_108_473	FSS13025	ancC	Q96P64	1	1	0.478
VIPR_ALG4_1008913396_108_473	FSS13025	ancC	Q96P70	1	1	0.496
VIPR_ALG4_1008913396_108_473	FSS13025	ancC	Q96PE3	1	1	0.498
VIPR_ALG4_1008913396_108_473	FSS13025	ancC	Q96PX1	1	1	0.474
VIPR_ALG4_1008913396_108_473	FSS13025	ancC	Q96PX8	1	1	0.492
VIPR_ALG4_1008913396_108_473	FSS13025	ancC	Q96PX9	1	1	0.48
VIPR_ALG4_1008913396_108_473	FSS13025	ancC	Q96PZ7	1	1	0.466
VIPR_ALG4_1008913396_108_473	FSS13025	ancC	Q96Q15	1	1	0.488
VIPR_ALG4_1008913396_108_473	FSS13025	ancC	Q96Q42	1	1	0.496
VIPR_ALG4_1008913396_108_473	FSS13025	ancC	Q96QG7	1	1	0.476
VIPR_ALG4_1008913396_108_473	FSS13025	ancC	Q96QP1	1	1	0.486
VIPR_ALG4_1008913396_108_473	FSS13025	ancC	Q96QT6	1	1	0.466
VIPR_ALG4_1008913396_108_473	FSS13025	ancC	Q96QV1	1	1	0.45
VIPR_ALG4_1008913396_108_473	FSS13025	ancC	Q96QZ7	1	1	0.416
VIPR_ALG4_1008913396_108_473	FSS13025	ancC	Q96R06	1	1	0.484
VIPR_ALG4_1008913396_108_473	FSS13025	ancC	Q96RL7	1	1	0.498
VIPR_ALG4_1008913396_108_473	FSS13025	ancC	Q96RS6	1	1	0.49
VIPR_ALG4_1008913396_108_473	FSS13025	ancC	Q96RT1	1	1	0.48
VIPR_ALG4_1008913396_108_473	FSS13025	ancC	Q96S65	1	1	0.488
VIPR_ALG4_1008913396_108_473	FSS13025	ancC	Q96ST3	1	1	0.468
VIPR_ALG4_1008913396_108_473	FSS13025	ancC	Q96T21	1	1	0.49
VIPR_ALG4_1008913396_108_473	FSS13025	ancC	Q99250	1	1	0.484
VIPR_ALG4_1008913396_108_473	FSS13025	ancC	Q99435	1	1	0.464
VIPR_ALG4_1008913396_108_473	FSS13025	ancC	Q99469	1	1	0.49
VIPR_ALG4_1008913396_108_473	FSS13025	ancC	Q99550	1	1	0.476
VIPR_ALG4_1008913396_108_473	FSS13025	ancC	Q99567	1	1	0.478
VIPR_ALG4_1008913396_108_473	FSS13025	ancC	Q99569	1	1	0.498
VIPR_ALG4_1008913396_108_473	FSS13025	ancC	Q99612	1	1	0.496
VIPR_ALG4_1008913396_108_473	FSS13025	ancC	Q99650	1	1	0.47
VIPR_ALG4_1008913396_108_473	FSS13025	ancC	Q99683	1	1	0.49
VIPR_ALG4_1008913396_108_473	FSS13025	ancC	Q99698	1	1	0.484
VIPR_ALG4_1008913396_108_473	FSS13025	ancC	Q99743	1	1	0.498
VIPR_ALG4_1008913396_108_473	FSS13025	ancC	Q99755	1	1	0.486
VIPR_ALG4_1008913396_108_473	FSS13025	ancC	Q99767	1	1	0.49
VIPR_ALG4_1008913396_108_473	FSS13025	ancC	Q99871	1	1	0.494
VIPR_ALG4_1008913396_108_473	FSS13025	ancC	Q99985	1	1	0.464
VIPR_ALG4_1008913396_108_473	FSS13025	ancC	Q9BPZ7	1	1	0.496
VIPR_ALG4_1008913396_108_473	FSS13025	ancC	Q9BQ31	1	1	0.49
VIPR_ALG4_1008913396_108_473	FSS13025	ancC	Q9BQ70	1	1	0.498
VIPR_ALG4_1008913396_108_473	FSS13025	ancC	Q9BQA5	1	1	0.478
VIPR_ALG4_1008913396_108_473	FSS13025	ancC	Q9BQF6	1	1	0.492
VIPR_ALG4_1008913396_108_473	FSS13025	ancC	Q9BQL6	1	1	0.494
VIPR_ALG4_1008913396_108_473	FSS13025	ancC	Q9BRC7	1	1	0.468
VIPR_ALG4_1008913396_108_473	FSS13025	ancC	Q9BSC4	1	1	0.486
VIPR_ALG4_1008913396_108_473	FSS13025	ancC	Q9BSU3	1	1	0.488
VIPR_ALG4_1008913396_108_473	FSS13025	ancC	Q9BTE0	1	1	0.45
VIPR_ALG4_1008913396_108_473	FSS13025	ancC	Q9BTE3	1	1	0.496
VIPR_ALG4_1008913396_108_473	FSS13025	ancC	Q9BUF5	1	1	0.488
VIPR_ALG4_1008913396_108_473	FSS13025	ancC	Q9BUR4	1	1	0.448
VIPR_ALG4_1008913396_108_473	FSS13025	ancC	Q9BVV6	1	1	0.494
VIPR_ALG4_1008913396_108_473	FSS13025	ancC	Q9BWT7	1	1	0.486
VIPR_ALG4_1008913396_108_473	FSS13025	ancC	Q9BX63	1	1	0.454
VIPR_ALG4_1008913396_108_473	FSS13025	ancC	Q9BXB4	1	1	0.446
VIPR_ALG4_1008913396_108_473	FSS13025	ancC	Q9BXJ9	1	1	0.49
VIPR_ALG4_1008913396_108_473	FSS13025	ancC	Q9BXP8	1	1	0.496
VIPR_ALG4_1008913396_108_473	FSS13025	ancC	Q9BXT4	1	1	0.466
VIPR_ALG4_1008913396_108_473	FSS13025	ancC	Q9BXT5	1	1	0.468
VIPR_ALG4_1008913396_108_473	FSS13025	ancC	Q9BXU1	1	1	0.494
VIPR_ALG4_1008913396_108_473	FSS13025	ancC	Q9BXW6	1	1	0.47
VIPR_ALG4_1008913396_108_473	FSS13025	ancC	Q9BXW9	1	1	0.488
VIPR_ALG4_1008913396_108_473	FSS13025	ancC	Q9BXX2	1	1	0.484
VIPR_ALG4_1008913396_108_473	FSS13025	ancC	Q9BXY5	1	1	0.484
VIPR_ALG4_1008913396_108_473	FSS13025	ancC	Q9BY66	1	1	0.444
VIPR_ALG4_1008913396_108_473	FSS13025	ancC	Q9BYG0	1	1	0.482
VIPR_ALG4_1008913396_108_473	FSS13025	ancC	Q9BYW2	1	1	0.498
VIPR_ALG4_1008913396_108_473	FSS13025	ancC	Q9BYX4	1	1	0.456
VIPR_ALG4_1008913396_108_473	FSS13025	ancC	Q9BZ29	1	1	0.47
VIPR_ALG4_1008913396_108_473	FSS13025	ancC	Q9BZA7	1	1	0.484
VIPR_ALG4_1008913396_108_473	FSS13025	ancC	Q9BZF1	1	1	0.472
VIPR_ALG4_1008913396_108_473	FSS13025	ancC	Q9BZF3	1	1	0.48
VIPR_ALG4_1008913396_108_473	FSS13025	ancC	Q9BZQ8	1	1	0.47
VIPR_ALG4_1008913396_108_473	FSS13025	ancC	Q9BZV3	1	1	0.49
VIPR_ALG4_1008913396_108_473	FSS13025	ancC	Q9C040	1	1	0.468
VIPR_ALG4_1008913396_108_473	FSS13025	ancC	Q9C0A0	1	1	0.498
VIPR_ALG4_1008913396_108_473	FSS13025	ancC	Q9C0A6	1	1	0.442
VIPR_ALG4_1008913396_108_473	FSS13025	ancC	Q9C0B0	1	1	0.46
VIPR_ALG4_1008913396_108_473	FSS13025	ancC	Q9C0B1	1	1	0.496
VIPR_ALG4_1008913396_108_473	FSS13025	ancC	Q9C0C7	1	1	0.44
VIPR_ALG4_1008913396_108_473	FSS13025	ancC	Q9C0D4	1	1	0.484
VIPR_ALG4_1008913396_108_473	FSS13025	ancC	Q9C0D5	1	1	0.476
VIPR_ALG4_1008913396_108_473	FSS13025	ancC	Q9C0G0	1	1	0.428
VIPR_ALG4_1008913396_108_473	FSS13025	ancC	Q9C0H5	1	1	0.478
VIPR_ALG4_1008913396_108_473	FSS13025	ancC	Q9GZR1	1	1	0.482
VIPR_ALG4_1008913396_108_473	FSS13025	ancC	Q9H000	1	1	0.49
VIPR_ALG4_1008913396_108_473	FSS13025	ancC	Q9H069	1	1	0.47
VIPR_ALG4_1008913396_108_473	FSS13025	ancC	Q9H089	1	1	0.46
VIPR_ALG4_1008913396_108_473	FSS13025	ancC	Q9H0E7	1	1	0.488
VIPR_ALG4_1008913396_108_473	FSS13025	ancC	Q9H0E9	1	1	0.49
VIPR_ALG4_1008913396_108_473	FSS13025	ancC	Q9H0J9	1	1	0.484
VIPR_ALG4_1008913396_108_473	FSS13025	ancC	Q9H175	1	1	0.492
VIPR_ALG4_1008913396_108_473	FSS13025	ancC	Q9H1K0	1	1	0.478
VIPR_ALG4_1008913396_108_473	FSS13025	ancC	Q9H1P3	1	1	0.46
VIPR_ALG4_1008913396_108_473	FSS13025	ancC	Q9H227	1	1	0.484
VIPR_ALG4_1008913396_108_473	FSS13025	ancC	Q9H270	1	1	0.432
VIPR_ALG4_1008913396_108_473	FSS13025	ancC	Q9H2C1	1	1	0.494
VIPR_ALG4_1008913396_108_473	FSS13025	ancC	Q9H2S6	1	1	0.462
VIPR_ALG4_1008913396_108_473	FSS13025	ancC	Q9H2Y7	1	1	0.444
VIPR_ALG4_1008913396_108_473	FSS13025	ancC	Q9H3M9	1	1	0.472
VIPR_ALG4_1008913396_108_473	FSS13025	ancC	Q9H3R0	1	1	0.46
VIPR_ALG4_1008913396_108_473	FSS13025	ancC	Q9H4B7	1	1	0.478
VIPR_ALG4_1008913396_108_473	FSS13025	ancC	Q9H4D0	1	1	0.396
VIPR_ALG4_1008913396_108_473	FSS13025	ancC	Q9H4D5	1	1	0.48
VIPR_ALG4_1008913396_108_473	FSS13025	ancC	Q9H4I0	1	1	0.474
VIPR_ALG4_1008913396_108_473	FSS13025	ancC	Q9H4L7	1	1	0.484
VIPR_ALG4_1008913396_108_473	FSS13025	ancC	Q9H579	1	1	0.48
VIPR_ALG4_1008913396_108_473	FSS13025	ancC	Q9H582	1	1	0.474
VIPR_ALG4_1008913396_108_473	FSS13025	ancC	Q9H5L6	1	1	0.498
VIPR_ALG4_1008913396_108_473	FSS13025	ancC	Q9H6U6	1	1	0.486
VIPR_ALG4_1008913396_108_473	FSS13025	ancC	Q9H792	1	1	0.476
VIPR_ALG4_1008913396_108_473	FSS13025	ancC	Q9H799	1	1	0.49
VIPR_ALG4_1008913396_108_473	FSS13025	ancC	Q9H7U1	1	1	0.494
VIPR_ALG4_1008913396_108_473	FSS13025	ancC	Q9H7Z3	1	1	0.484
VIPR_ALG4_1008913396_108_473	FSS13025	ancC	Q9H8N7	1	1	0.49
VIPR_ALG4_1008913396_108_473	FSS13025	ancC	Q9H9A5	1	1	0.448
VIPR_ALG4_1008913396_108_473	FSS13025	ancC	Q9H9A6	1	1	0.462
VIPR_ALG4_1008913396_108_473	FSS13025	ancC	Q9H9E3	1	1	0.432
VIPR_ALG4_1008913396_108_473	FSS13025	ancC	Q9H9P5	1	1	0.488
VIPR_ALG4_1008913396_108_473	FSS13025	ancC	Q9H9Y4	1	1	0.496
VIPR_ALG4_1008913396_108_473	FSS13025	ancC	Q9HAU4	1	1	0.402
VIPR_ALG4_1008913396_108_473	FSS13025	ancC	Q9HAV4	1	1	0.488
VIPR_ALG4_1008913396_108_473	FSS13025	ancC	Q9HB58	1	1	0.498
VIPR_ALG4_1008913396_108_473	FSS13025	ancC	Q9HBG6	1	1	0.496
VIPR_ALG4_1008913396_108_473	FSS13025	ancC	Q9HBG7	1	1	0.464
VIPR_ALG4_1008913396_108_473	FSS13025	ancC	Q9HBH9	1	1	0.49
VIPR_ALG4_1008913396_108_473	FSS13025	ancC	Q9HBJ7	1	1	0.478
VIPR_ALG4_1008913396_108_473	FSS13025	ancC	Q9HBM0	1	1	0.498
VIPR_ALG4_1008913396_108_473	FSS13025	ancC	Q9HC78	1	1	0.476
VIPR_ALG4_1008913396_108_473	FSS13025	ancC	Q9HCE3	1	1	0.488
VIPR_ALG4_1008913396_108_473	FSS13025	ancC	Q9HCE7	1	1	0.448
VIPR_ALG4_1008913396_108_473	FSS13025	ancC	Q9HCI6	1	1	0.47
VIPR_ALG4_1008913396_108_473	FSS13025	ancC	Q9HCI7	1	1	0.442
VIPR_ALG4_1008913396_108_473	FSS13025	ancC	Q9HCK0	1	1	0.47
VIPR_ALG4_1008913396_108_473	FSS13025	ancC	Q9HCM9	1	1	0.482
VIPR_ALG4_1008913396_108_473	FSS13025	ancC	Q9HCR9	1	1	0.492
VIPR_ALG4_1008913396_108_473	FSS13025	ancC	Q9HD67	1	1	0.468
VIPR_ALG4_1008913396_108_473	FSS13025	ancC	Q9NP56	1	1	0.496
VIPR_ALG4_1008913396_108_473	FSS13025	ancC	Q9NQ36	1	1	0.47
VIPR_ALG4_1008913396_108_473	FSS13025	ancC	Q9NQ75	1	1	0.45
VIPR_ALG4_1008913396_108_473	FSS13025	ancC	Q9NQH7	1	1	0.484
VIPR_ALG4_1008913396_108_473	FSS13025	ancC	Q9NQV6	1	1	0.468
VIPR_ALG4_1008913396_108_473	FSS13025	ancC	Q9NQX1	1	1	0.468
VIPR_ALG4_1008913396_108_473	FSS13025	ancC	Q9NR09	1	1	0.47
VIPR_ALG4_1008913396_108_473	FSS13025	ancC	Q9NR16	1	1	0.478
VIPR_ALG4_1008913396_108_473	FSS13025	ancC	Q9NR21	1	1	0.48
VIPR_ALG4_1008913396_108_473	FSS13025	ancC	Q9NR61	1	1	0.454
VIPR_ALG4_1008913396_108_473	FSS13025	ancC	Q9NRE2	1	1	0.472
VIPR_ALG4_1008913396_108_473	FSS13025	ancC	Q9NRH2	1	1	0.49
VIPR_ALG4_1008913396_108_473	FSS13025	ancC	Q9NRH3	1	1	0.458
VIPR_ALG4_1008913396_108_473	FSS13025	ancC	Q9NRL2	1	1	0.494
VIPR_ALG4_1008913396_108_473	FSS13025	ancC	Q9NRW7	1	1	0.488
VIPR_ALG4_1008913396_108_473	FSS13025	ancC	Q9NS68	1	1	0.498
VIPR_ALG4_1008913396_108_473	FSS13025	ancC	Q9NSI6	1	1	0.478
VIPR_ALG4_1008913396_108_473	FSS13025	ancC	Q9NT62	1	1	0.484
VIPR_ALG4_1008913396_108_473	FSS13025	ancC	Q9NUA8	1	1	0.49
VIPR_ALG4_1008913396_108_473	FSS13025	ancC	Q9NUJ3	1	1	0.488
VIPR_ALG4_1008913396_108_473	FSS13025	ancC	Q9NUY8	1	1	0.474
VIPR_ALG4_1008913396_108_473	FSS13025	ancC	Q9NV70	1	1	0.486
VIPR_ALG4_1008913396_108_473	FSS13025	ancC	Q9NVH2	1	1	0.49
VIPR_ALG4_1008913396_108_473	FSS13025	ancC	Q9NVM4	1	1	0.452
VIPR_ALG4_1008913396_108_473	FSS13025	ancC	Q9NVN8	1	1	0.46
VIPR_ALG4_1008913396_108_473	FSS13025	ancC	Q9NVU7	1	1	0.498
VIPR_ALG4_1008913396_108_473	FSS13025	ancC	Q9NVV4	1	1	0.486
VIPR_ALG4_1008913396_108_473	FSS13025	ancC	Q9NW38	1	1	0.47
VIPR_ALG4_1008913396_108_473	FSS13025	ancC	Q9NWF9	1	1	0.476
VIPR_ALG4_1008913396_108_473	FSS13025	ancC	Q9NWS8	1	1	0.494
VIPR_ALG4_1008913396_108_473	FSS13025	ancC	Q9NWZ3	1	1	0.486
VIPR_ALG4_1008913396_108_473	FSS13025	ancC	Q9NX02	1	1	0.49
VIPR_ALG4_1008913396_108_473	FSS13025	ancC	Q9NXC5	1	1	0.482
VIPR_ALG4_1008913396_108_473	FSS13025	ancC	Q9NXD2	1	1	0.498
VIPR_ALG4_1008913396_108_473	FSS13025	ancC	Q9NXP7	1	1	0.492
VIPR_ALG4_1008913396_108_473	FSS13025	ancC	Q9NY46	1	1	0.482
VIPR_ALG4_1008913396_108_473	FSS13025	ancC	Q9NYA4	1	1	0.482
VIPR_ALG4_1008913396_108_473	FSS13025	ancC	Q9NYF3	1	1	0.478
VIPR_ALG4_1008913396_108_473	FSS13025	ancC	Q9NYF5	1	1	0.494
VIPR_ALG4_1008913396_108_473	FSS13025	ancC	Q9NYI0	1	1	0.486
VIPR_ALG4_1008913396_108_473	FSS13025	ancC	Q9NYJ8	1	1	0.476
VIPR_ALG4_1008913396_108_473	FSS13025	ancC	Q9NYK1	1	1	0.48
VIPR_ALG4_1008913396_108_473	FSS13025	ancC	Q9NZ09	1	1	0.466
VIPR_ALG4_1008913396_108_473	FSS13025	ancC	Q9NZI6	1	1	0.49
VIPR_ALG4_1008913396_108_473	FSS13025	ancC	Q9NZL6	1	1	0.462
VIPR_ALG4_1008913396_108_473	FSS13025	ancC	Q9NZM3	1	1	0.484
VIPR_ALG4_1008913396_108_473	FSS13025	ancC	Q9NZR2	1	1	0.448
VIPR_ALG4_1008913396_108_473	FSS13025	ancC	Q9P0K1	1	1	0.484
VIPR_ALG4_1008913396_108_473	FSS13025	ancC	Q9P0L2	1	1	0.498
VIPR_ALG4_1008913396_108_473	FSS13025	ancC	Q9P0P0	1	1	0.494
VIPR_ALG4_1008913396_108_473	FSS13025	ancC	Q9P0U3	1	1	0.484
VIPR_ALG4_1008913396_108_473	FSS13025	ancC	Q9P0U4	1	1	0.49
VIPR_ALG4_1008913396_108_473	FSS13025	ancC	Q9P104	1	1	0.478
VIPR_ALG4_1008913396_108_473	FSS13025	ancC	Q9P212	1	1	0.476
VIPR_ALG4_1008913396_108_473	FSS13025	ancC	Q9P253	1	1	0.468
VIPR_ALG4_1008913396_108_473	FSS13025	ancC	Q9P260	1	1	0.478
VIPR_ALG4_1008913396_108_473	FSS13025	ancC	Q9P267	1	1	0.498
VIPR_ALG4_1008913396_108_473	FSS13025	ancC	Q9P273	1	1	0.43
VIPR_ALG4_1008913396_108_473	FSS13025	ancC	Q9P278	1	1	0.458
VIPR_ALG4_1008913396_108_473	FSS13025	ancC	Q9P2D0	1	1	0.496
VIPR_ALG4_1008913396_108_473	FSS13025	ancC	Q9P2D6	1	1	0.46
VIPR_ALG4_1008913396_108_473	FSS13025	ancC	Q9P2E3	1	1	0.43
VIPR_ALG4_1008913396_108_473	FSS13025	ancC	Q9P2F6	1	1	0.486
VIPR_ALG4_1008913396_108_473	FSS13025	ancC	Q9P2G1	1	1	0.462
VIPR_ALG4_1008913396_108_473	FSS13025	ancC	Q9P2H3	1	1	0.48
VIPR_ALG4_1008913396_108_473	FSS13025	ancC	Q9P2I0	1	1	0.496
VIPR_ALG4_1008913396_108_473	FSS13025	ancC	Q9P2J9	1	1	0.466
VIPR_ALG4_1008913396_108_473	FSS13025	ancC	Q9P2M4	1	1	0.498
VIPR_ALG4_1008913396_108_473	FSS13025	ancC	Q9P2N4	1	1	0.438
VIPR_ALG4_1008913396_108_473	FSS13025	ancC	Q9P2P5	1	1	0.464
VIPR_ALG4_1008913396_108_473	FSS13025	ancC	Q9P2P6	1	1	0.44
VIPR_ALG4_1008913396_108_473	FSS13025	ancC	Q9P2S5	1	1	0.494
VIPR_ALG4_1008913396_108_473	FSS13025	ancC	Q9UBG0	1	1	0.482
VIPR_ALG4_1008913396_108_473	FSS13025	ancC	Q9UBS8	1	1	0.482
VIPR_ALG4_1008913396_108_473	FSS13025	ancC	Q9UBT6	1	1	0.466
VIPR_ALG4_1008913396_108_473	FSS13025	ancC	Q9UBU9	1	1	0.458
VIPR_ALG4_1008913396_108_473	FSS13025	ancC	Q9UBW7	1	1	0.468
VIPR_ALG4_1008913396_108_473	FSS13025	ancC	Q9UBX5	1	1	0.49
VIPR_ALG4_1008913396_108_473	FSS13025	ancC	Q9UF33	1	1	0.49
VIPR_ALG4_1008913396_108_473	FSS13025	ancC	Q9UGI0	1	1	0.468
VIPR_ALG4_1008913396_108_473	FSS13025	ancC	Q9UGL1	1	1	0.464
VIPR_ALG4_1008913396_108_473	FSS13025	ancC	Q9UGR2	1	1	0.484
VIPR_ALG4_1008913396_108_473	FSS13025	ancC	Q9UH17	1	1	0.486
VIPR_ALG4_1008913396_108_473	FSS13025	ancC	Q9UH90	1	1	0.464
VIPR_ALG4_1008913396_108_473	FSS13025	ancC	Q9UHC1	1	1	0.444
VIPR_ALG4_1008913396_108_473	FSS13025	ancC	Q9UHD2	1	1	0.46
VIPR_ALG4_1008913396_108_473	FSS13025	ancC	Q9UHF7	1	1	0.428
VIPR_ALG4_1008913396_108_473	FSS13025	ancC	Q9UHI8	1	1	0.458
VIPR_ALG4_1008913396_108_473	FSS13025	ancC	Q9UHV7	1	1	0.476
VIPR_ALG4_1008913396_108_473	FSS13025	ancC	Q9UI42	1	1	0.496
VIPR_ALG4_1008913396_108_473	FSS13025	ancC	Q9UIA0	1	1	0.484
VIPR_ALG4_1008913396_108_473	FSS13025	ancC	Q9UIA9	1	1	0.45
VIPR_ALG4_1008913396_108_473	FSS13025	ancC	Q9UID6	1	1	0.474
VIPR_ALG4_1008913396_108_473	FSS13025	ancC	Q9UIF9	1	1	0.478
VIPR_ALG4_1008913396_108_473	FSS13025	ancC	Q9UII4	1	1	0.46
VIPR_ALG4_1008913396_108_473	FSS13025	ancC	Q9UIQ6	1	1	0.476
VIPR_ALG4_1008913396_108_473	FSS13025	ancC	Q9UIY3	1	1	0.47
VIPR_ALG4_1008913396_108_473	FSS13025	ancC	Q9UJ71	1	1	0.472
VIPR_ALG4_1008913396_108_473	FSS13025	ancC	Q9UJ78	1	1	0.48
VIPR_ALG4_1008913396_108_473	FSS13025	ancC	Q9UJV3	1	1	0.472
VIPR_ALG4_1008913396_108_473	FSS13025	ancC	Q9UJW3	1	1	0.494
VIPR_ALG4_1008913396_108_473	FSS13025	ancC	Q9UK32	1	1	0.498
VIPR_ALG4_1008913396_108_473	FSS13025	ancC	Q9UK59	1	1	0.494
VIPR_ALG4_1008913396_108_473	FSS13025	ancC	Q9UKA4	1	1	0.468
VIPR_ALG4_1008913396_108_473	FSS13025	ancC	Q9UKF2	1	1	0.496
VIPR_ALG4_1008913396_108_473	FSS13025	ancC	Q9UKF5	1	1	0.48
VIPR_ALG4_1008913396_108_473	FSS13025	ancC	Q9UKL3	1	1	0.492
VIPR_ALG4_1008913396_108_473	FSS13025	ancC	Q9UKQ2	1	1	0.47
VIPR_ALG4_1008913396_108_473	FSS13025	ancC	Q9UKT4	1	1	0.498
VIPR_ALG4_1008913396_108_473	FSS13025	ancC	Q9UKU9	1	1	0.488
VIPR_ALG4_1008913396_108_473	FSS13025	ancC	Q9UKV5	1	1	0.45
VIPR_ALG4_1008913396_108_473	FSS13025	ancC	Q9UKW4	1	1	0.468
VIPR_ALG4_1008913396_108_473	FSS13025	ancC	Q9UKY1	1	1	0.498
VIPR_ALG4_1008913396_108_473	FSS13025	ancC	Q9UKZ4	1	1	0.466
VIPR_ALG4_1008913396_108_473	FSS13025	ancC	Q9UL36	1	1	0.49
VIPR_ALG4_1008913396_108_473	FSS13025	ancC	Q9UL52	1	1	0.462
VIPR_ALG4_1008913396_108_473	FSS13025	ancC	Q9UL58	1	1	0.478
VIPR_ALG4_1008913396_108_473	FSS13025	ancC	Q9ULD2	1	1	0.476
VIPR_ALG4_1008913396_108_473	FSS13025	ancC	Q9ULD4	1	1	0.49
VIPR_ALG4_1008913396_108_473	FSS13025	ancC	Q9ULD5	1	1	0.462
VIPR_ALG4_1008913396_108_473	FSS13025	ancC	Q9ULD6	1	1	0.496
VIPR_ALG4_1008913396_108_473	FSS13025	ancC	Q9ULH1	1	1	0.482
VIPR_ALG4_1008913396_108_473	FSS13025	ancC	Q9ULI1	1	1	0.438
VIPR_ALG4_1008913396_108_473	FSS13025	ancC	Q9ULJ3	1	1	0.466
VIPR_ALG4_1008913396_108_473	FSS13025	ancC	Q9ULL0	1	1	0.496
VIPR_ALG4_1008913396_108_473	FSS13025	ancC	Q9ULL1	1	1	0.432
VIPR_ALG4_1008913396_108_473	FSS13025	ancC	Q9ULL8	1	1	0.434
VIPR_ALG4_1008913396_108_473	FSS13025	ancC	Q9ULM0	1	1	0.468
VIPR_ALG4_1008913396_108_473	FSS13025	ancC	Q9ULM6	1	1	0.496
VIPR_ALG4_1008913396_108_473	FSS13025	ancC	Q9ULT8	1	1	0.466
VIPR_ALG4_1008913396_108_473	FSS13025	ancC	Q9ULU4	1	1	0.48
VIPR_ALG4_1008913396_108_473	FSS13025	ancC	Q9ULV0	1	1	0.484
VIPR_ALG4_1008913396_108_473	FSS13025	ancC	Q9ULX3	1	1	0.498
VIPR_ALG4_1008913396_108_473	FSS13025	ancC	Q9ULX7	1	1	0.49
VIPR_ALG4_1008913396_108_473	FSS13025	ancC	Q9UMQ6	1	1	0.486
VIPR_ALG4_1008913396_108_473	FSS13025	ancC	Q9UMS4	1	1	0.482
VIPR_ALG4_1008913396_108_473	FSS13025	ancC	Q9UPP1	1	1	0.476
VIPR_ALG4_1008913396_108_473	FSS13025	ancC	Q9UPQ7	1	1	0.472
VIPR_ALG4_1008913396_108_473	FSS13025	ancC	Q9UPR3	1	1	0.466
VIPR_ALG4_1008913396_108_473	FSS13025	ancC	Q9UPT5	1	1	0.498
VIPR_ALG4_1008913396_108_473	FSS13025	ancC	Q9UPT9	1	1	0.462
VIPR_ALG4_1008913396_108_473	FSS13025	ancC	Q9UPU5	1	1	0.444
VIPR_ALG4_1008913396_108_473	FSS13025	ancC	Q9UPW5	1	1	0.468
VIPR_ALG4_1008913396_108_473	FSS13025	ancC	Q9UPX6	1	1	0.484
VIPR_ALG4_1008913396_108_473	FSS13025	ancC	Q9UPY3	1	1	0.464
VIPR_ALG4_1008913396_108_473	FSS13025	ancC	Q9UQ26	1	1	0.496
VIPR_ALG4_1008913396_108_473	FSS13025	ancC	Q9UQ84	1	1	0.484
VIPR_ALG4_1008913396_108_473	FSS13025	ancC	Q9UQC2	1	1	0.474
VIPR_ALG4_1008913396_108_473	FSS13025	ancC	Q9UQC9	1	1	0.492
VIPR_ALG4_1008913396_108_473	FSS13025	ancC	Q9UQL6	1	1	0.47
VIPR_ALG4_1008913396_108_473	FSS13025	ancC	Q9Y233	1	1	0.472
VIPR_ALG4_1008913396_108_473	FSS13025	ancC	Q9Y263	1	1	0.452
VIPR_ALG4_1008913396_108_473	FSS13025	ancC	Q9Y2A7	1	1	0.48
VIPR_ALG4_1008913396_108_473	FSS13025	ancC	Q9Y2F5	1	1	0.43
VIPR_ALG4_1008913396_108_473	FSS13025	ancC	Q9Y2G1	1	1	0.488
VIPR_ALG4_1008913396_108_473	FSS13025	ancC	Q9Y2H2	1	1	0.498
VIPR_ALG4_1008913396_108_473	FSS13025	ancC	Q9Y2I7	1	1	0.476
VIPR_ALG4_1008913396_108_473	FSS13025	ancC	Q9Y2K1	1	1	0.45
VIPR_ALG4_1008913396_108_473	FSS13025	ancC	Q9Y2K6	1	1	0.476
VIPR_ALG4_1008913396_108_473	FSS13025	ancC	Q9Y2K9	1	1	0.46
VIPR_ALG4_1008913396_108_473	FSS13025	ancC	Q9Y2L9	1	1	0.494
VIPR_ALG4_1008913396_108_473	FSS13025	ancC	Q9Y2M0	1	1	0.462
VIPR_ALG4_1008913396_108_473	FSS13025	ancC	Q9Y2T1	1	1	0.494
VIPR_ALG4_1008913396_108_473	FSS13025	ancC	Q9Y2X0	1	1	0.442
VIPR_ALG4_1008913396_108_473	FSS13025	ancC	Q9Y2X7	1	1	0.492
VIPR_ALG4_1008913396_108_473	FSS13025	ancC	Q9Y366	1	1	0.486
VIPR_ALG4_1008913396_108_473	FSS13025	ancC	Q9Y3P9	1	1	0.478
VIPR_ALG4_1008913396_108_473	FSS13025	ancC	Q9Y3Q7	1	1	0.458
VIPR_ALG4_1008913396_108_473	FSS13025	ancC	Q9Y3Z3	1	1	0.362
VIPR_ALG4_1008913396_108_473	FSS13025	ancC	Q9Y485	1	1	0.458
VIPR_ALG4_1008913396_108_473	FSS13025	ancC	Q9Y493	1	1	0.498
VIPR_ALG4_1008913396_108_473	FSS13025	ancC	Q9Y4A0	1	1	0.472
VIPR_ALG4_1008913396_108_473	FSS13025	ancC	Q9Y4A5	1	1	0.454
VIPR_ALG4_1008913396_108_473	FSS13025	ancC	Q9Y4B4	1	1	0.476
VIPR_ALG4_1008913396_108_473	FSS13025	ancC	Q9Y4B6	1	1	0.422
VIPR_ALG4_1008913396_108_473	FSS13025	ancC	Q9Y4C1	1	1	0.48
VIPR_ALG4_1008913396_108_473	FSS13025	ancC	Q9Y4D8	1	1	0.492
VIPR_ALG4_1008913396_108_473	FSS13025	ancC	Q9Y4E5	1	1	0.434
VIPR_ALG4_1008913396_108_473	FSS13025	ancC	Q9Y4E6	1	1	0.488
VIPR_ALG4_1008913396_108_473	FSS13025	ancC	Q9Y4E8	1	1	0.496
VIPR_ALG4_1008913396_108_473	FSS13025	ancC	Q9Y4F1	1	1	0.488
VIPR_ALG4_1008913396_108_473	FSS13025	ancC	Q9Y4F3	1	1	0.43
VIPR_ALG4_1008913396_108_473	FSS13025	ancC	Q9Y4F9	1	1	0.482
VIPR_ALG4_1008913396_108_473	FSS13025	ancC	Q9Y4G2	1	1	0.494
VIPR_ALG4_1008913396_108_473	FSS13025	ancC	Q9Y4G8	1	1	0.458
VIPR_ALG4_1008913396_108_473	FSS13025	ancC	Q9Y4J8	1	1	0.486
VIPR_ALG4_1008913396_108_473	FSS13025	ancC	Q9Y4K0	1	1	0.466
VIPR_ALG4_1008913396_108_473	FSS13025	ancC	Q9Y4K3	1	1	0.47
VIPR_ALG4_1008913396_108_473	FSS13025	ancC	Q9Y508	1	1	0.482
VIPR_ALG4_1008913396_108_473	FSS13025	ancC	Q9Y561	1	1	0.482
VIPR_ALG4_1008913396_108_473	FSS13025	ancC	Q9Y572	1	1	0.496
VIPR_ALG4_1008913396_108_473	FSS13025	ancC	Q9Y5A7	1	1	0.464
VIPR_ALG4_1008913396_108_473	FSS13025	ancC	Q9Y5P4	1	1	0.488
VIPR_ALG4_1008913396_108_473	FSS13025	ancC	Q9Y5Q5	1	1	0.442
VIPR_ALG4_1008913396_108_473	FSS13025	ancC	Q9Y5T5	1	1	0.488
[truncated: 15,225 more rows]
